# Supplementary material for: Assessment of Common and Emerging Bioinformatics Pipelines for Targeted Metagenomics
Source: PLoS One. 2017 Jan 4;12(1):e0169563. doi: 10.1371/journal.pone.0169563 (PMC5215245; doi:10.1371/journal.pone.0169563)
Supplement: S1 File — (XLSX) [file pone.0169563.s001.xlsx]

## Sheet: F-measure
Pipeline	Amplicon	Error simulation	Complexity	Throughput	Rank	Bank	# true positives	# false positives	# false negatives	Precision	Recall	F-measure
BMP	200(V3)	No	LC	25000	family	Greengenes	21935	1440	1625	0.938396	0.931027	0.934697
BMP	200(V3)	No	LC	25000	genus	Greengenes	10143	1873	12984	0.844125	0.438578	0.577242
BMP	200(V3)	No	LC	50000	family	Greengenes	43730	2671	3599	0.942437	0.923958	0.933106
BMP	200(V3)	No	LC	50000	genus	Greengenes	20208	3830	25962	0.840669	0.437687	0.575661
BMP	200(V3)	No	LC	100000	family	Greengenes	88173	4894	6933	0.947414	0.927102	0.937148
BMP	200(V3)	No	LC	100000	genus	Greengenes	40230	7464	52306	0.843502	0.43475	0.573772
BMP	200(V3)	No	MC	25000	family	Greengenes	24049	385	566	0.984243	0.977006	0.980611
BMP	200(V3)	No	MC	25000	genus	Greengenes	12992	533	11475	0.960591	0.531001	0.683933
BMP	200(V3)	No	MC	50000	family	Greengenes	48288	594	1118	0.987848	0.977371	0.982582
BMP	200(V3)	No	MC	50000	genus	Greengenes	25942	1047	23011	0.961206	0.529937	0.683206
BMP	200(V3)	No	MC	100000	family	Greengenes	96259	1268	2473	0.986998	0.974952	0.980938
BMP	200(V3)	No	MC	100000	genus	Greengenes	51676	2004	46320	0.962668	0.527328	0.6814
BMP	200(V3)	No	HC	25000	family	Greengenes	20788	1939	2273	0.914683	0.901435	0.908011
BMP	200(V3)	No	HC	25000	genus	Greengenes	14340	2624	8036	0.84532	0.640865	0.729029
BMP	200(V3)	No	HC	50000	family	Greengenes	40911	3808	5281	0.914846	0.885673	0.900023
BMP	200(V3)	No	HC	50000	genus	Greengenes	28496	5340	16164	0.84218	0.638065	0.72605
BMP	200(V3)	No	HC	100000	family	Greengenes	82544	6486	10970	0.927148	0.882691	0.904374
BMP	200(V3)	No	HC	100000	genus	Greengenes	57194	10477	32329	0.845177	0.638875	0.727687
BMP	400(V4-V5)	No	LC	25000	family	Greengenes	22970	818	1212	0.965613	0.94988	0.957682
BMP	400(V4-V5)	No	LC	25000	genus	Greengenes	10276	9435	5289	0.521333	0.660199	0.582606
BMP	400(V4-V5)	No	LC	50000	family	Greengenes	46055	1356	2589	0.971399	0.946777	0.95893
BMP	400(V4-V5)	No	LC	50000	genus	Greengenes	20693	18804	10503	0.523913	0.663322	0.585433
BMP	400(V4-V5)	No	LC	100000	family	Greengenes	91195	3327	5478	0.964802	0.943335	0.953948
BMP	400(V4-V5)	No	LC	100000	genus	Greengenes	41654	38011	20335	0.522864	0.671958	0.588109
BMP	400(V4-V5)	No	MC	25000	family	Greengenes	24401	265	334	0.989256	0.986497	0.987875
BMP	400(V4-V5)	No	MC	25000	genus	Greengenes	8079	2871	14050	0.737808	0.365087	0.488467
BMP	400(V4-V5)	No	MC	50000	family	Greengenes	48897	374	729	0.992409	0.98531	0.988847
BMP	400(V4-V5)	No	MC	50000	genus	Greengenes	16278	16017	17705	0.504041	0.479004	0.491204
BMP	400(V4-V5)	No	MC	100000	family	Greengenes	97730	799	1471	0.991891	0.985172	0.98852
BMP	400(V4-V5)	No	MC	100000	genus	Greengenes	31775	32290	35935	0.495981	0.469281	0.482261
BMP	400(V4-V5)	No	HC	25000	family	Greengenes	22234	1000	1766	0.95696	0.926417	0.94144
BMP	400(V4-V5)	No	HC	25000	genus	Greengenes	14506	3023	7471	0.827543	0.660054	0.734369
BMP	400(V4-V5)	No	HC	50000	family	Greengenes	44260	1962	3778	0.957553	0.921354	0.939105
BMP	400(V4-V5)	No	HC	50000	genus	Greengenes	28607	6291	15102	0.819732	0.654488	0.727849
BMP	400(V4-V5)	No	HC	100000	family	Greengenes	87511	4851	7638	0.947478	0.919726	0.933396
BMP	400(V4-V5)	No	HC	100000	genus	Greengenes	58694	11603	29703	0.834943	0.663982	0.739713
BMP	200(V3)	Yes	LC	25000	family	Greengenes	21195	1474	2331	0.934977	0.900918	0.917632
BMP	200(V3)	Yes	LC	25000	genus	Greengenes	9473	6034	9493	0.610885	0.499473	0.54959
BMP	200(V3)	Yes	LC	50000	family	Greengenes	41677	2969	5354	0.933499	0.88616	0.909214
BMP	200(V3)	Yes	LC	50000	genus	Greengenes	19248	11280	19472	0.630503	0.497107	0.555915
BMP	200(V3)	Yes	LC	100000	family	Greengenes	81470	8858	9672	0.901935	0.89388	0.897889
BMP	200(V3)	Yes	LC	100000	genus	Greengenes	37775	23789	38436	0.613589	0.495663	0.548358
BMP	200(V3)	Yes	MC	25000	family	Greengenes	23537	734	729	0.969758	0.969958	0.969858
BMP	200(V3)	Yes	MC	25000	genus	Greengenes	14725	3197	7078	0.821616	0.675366	0.741347
BMP	200(V3)	Yes	MC	50000	family	Greengenes	47682	783	1535	0.983844	0.968812	0.97627
BMP	200(V3)	Yes	MC	50000	genus	Greengenes	28653	5152	16195	0.847597	0.638891	0.728593
BMP	200(V3)	Yes	MC	100000	family	Greengenes	94754	1617	3629	0.983221	0.963114	0.973063
BMP	200(V3)	Yes	MC	100000	genus	Greengenes	56516	11656	31828	0.829021	0.639727	0.722175
BMP	200(V3)	Yes	HC	25000	family	Greengenes	19536	2049	3415	0.905073	0.851205	0.877313
BMP	200(V3)	Yes	HC	25000	genus	Greengenes	12482	2764	9754	0.818707	0.561342	0.666026
BMP	200(V3)	Yes	HC	50000	family	Greengenes	38333	4022	7645	0.905041	0.833725	0.86792
BMP	200(V3)	Yes	HC	50000	genus	Greengenes	25660	5638	18702	0.819861	0.578423	0.678298
BMP	200(V3)	Yes	HC	100000	family	Greengenes	78954	7600	13446	0.912194	0.854481	0.882394
BMP	200(V3)	Yes	HC	100000	genus	Greengenes	53573	11911	34516	0.818108	0.608169	0.697688
BMP	400(V4-V5)	Yes	LC	25000	family	Greengenes	20610	477	3913	0.977379	0.840436	0.903749
BMP	400(V4-V5)	Yes	LC	25000	genus	Greengenes	9331	2060	13609	0.819155	0.406757	0.54359
BMP	400(V4-V5)	Yes	LC	50000	family	Greengenes	41169	1171	7660	0.972343	0.843126	0.903136
BMP	400(V4-V5)	Yes	LC	50000	genus	Greengenes	18895	5049	26056	0.789133	0.420347	0.548516
BMP	400(V4-V5)	Yes	LC	100000	family	Greengenes	79951	2302	17747	0.972013	0.818348	0.888586
BMP	400(V4-V5)	Yes	LC	100000	genus	Greengenes	37593	10004	52403	0.789819	0.417719	0.546438
BMP	400(V4-V5)	Yes	MC	25000	family	Greengenes	22319	173	2508	0.992308	0.898981	0.943342
BMP	400(V4-V5)	Yes	MC	25000	genus	Greengenes	7639	2445	14916	0.757537	0.338683	0.46809
BMP	400(V4-V5)	Yes	MC	50000	family	Greengenes	43438	265	6297	0.993936	0.873389	0.929772
BMP	400(V4-V5)	Yes	MC	50000	genus	Greengenes	14704	2513	32783	0.85404	0.309643	0.4545
BMP	400(V4-V5)	Yes	MC	100000	family	Greengenes	85403	626	13971	0.992723	0.85941	0.921269
BMP	400(V4-V5)	Yes	MC	100000	genus	Greengenes	29272	6190	64538	0.825447	0.312035	0.452875
BMP	400(V4-V5)	Yes	HC	25000	family	Greengenes	19969	790	4241	0.961944	0.824824	0.888123
BMP	400(V4-V5)	Yes	HC	25000	genus	Greengenes	13837	2123	9040	0.86698	0.604843	0.712568
BMP	400(V4-V5)	Yes	HC	50000	family	Greengenes	40086	1746	8168	0.958262	0.830729	0.88995
BMP	400(V4-V5)	Yes	HC	50000	genus	Greengenes	27551	3613	18836	0.884065	0.593938	0.710526
BMP	400(V4-V5)	Yes	HC	100000	family	Greengenes	80139	3757	16104	0.955218	0.832674	0.889746
BMP	400(V4-V5)	Yes	HC	100000	genus	Greengenes	55568	8251	36181	0.870712	0.605652	0.714389
BMP	200(V3)	No	LC	25000	family	SILVA	21828	538	2634	0.975946	0.892323	0.932263
BMP	200(V3)	No	LC	25000	genus	SILVA	11600	1237	12163	0.903638	0.488154	0.63388
BMP	200(V3)	No	LC	50000	family	SILVA	43593	1177	5230	0.97371	0.892878	0.931544
BMP	200(V3)	No	LC	50000	genus	SILVA	23199	2248	24553	0.91166	0.485823	0.633861
BMP	200(V3)	No	LC	100000	family	SILVA	87899	1989	10112	0.977872	0.896828	0.935598
BMP	200(V3)	No	LC	100000	genus	SILVA	46530	4076	49394	0.919456	0.485072	0.635092
BMP	200(V3)	No	MC	25000	family	SILVA	23976	178	846	0.992631	0.965917	0.979092
BMP	200(V3)	No	MC	25000	genus	SILVA	13362	343	11295	0.974973	0.541915	0.696627
BMP	200(V3)	No	MC	50000	family	SILVA	48084	205	1711	0.995755	0.965639	0.980466
BMP	200(V3)	No	MC	50000	genus	SILVA	26750	537	22713	0.98032	0.540808	0.697068
BMP	200(V3)	No	MC	100000	family	SILVA	96180	586	3234	0.993944	0.967469	0.980528
BMP	200(V3)	No	MC	100000	genus	SILVA	53346	1256	45398	0.976997	0.540245	0.69576
BMP	200(V3)	No	HC	25000	family	SILVA	20765	827	3408	0.961699	0.859016	0.907462
BMP	200(V3)	No	HC	25000	genus	SILVA	16594	1655	6751	0.90931	0.710816	0.797904
BMP	200(V3)	No	HC	50000	family	SILVA	40992	2106	6902	0.951135	0.85589	0.901002
BMP	200(V3)	No	HC	50000	genus	SILVA	33011	5554	11435	0.855983	0.742722	0.79534
BMP	200(V3)	No	HC	100000	family	SILVA	82719	2469	14812	0.971017	0.84813	0.905423
BMP	200(V3)	No	HC	100000	genus	SILVA	67536	8875	23589	0.883852	0.741136	0.806227
BMP	400(V4-V5)	No	LC	25000	family	SILVA	23629	327	1044	0.98635	0.957687	0.971807
BMP	400(V4-V5)	No	LC	25000	genus	SILVA	13130	2074	9796	0.863589	0.572712	0.688697
BMP	400(V4-V5)	No	LC	50000	family	SILVA	46911	537	2552	0.988682	0.948406	0.968125
BMP	400(V4-V5)	No	LC	50000	genus	SILVA	26150	3852	19998	0.871609	0.566655	0.686802
BMP	400(V4-V5)	No	LC	100000	family	SILVA	93477	689	5834	0.992683	0.941255	0.966285
BMP	400(V4-V5)	No	LC	100000	genus	SILVA	51832	8069	40099	0.865294	0.563814	0.682755
BMP	400(V4-V5)	No	MC	25000	family	SILVA	24591	88	321	0.996434	0.987115	0.991753
BMP	400(V4-V5)	No	MC	25000	genus	SILVA	18761	3211	3028	0.853859	0.861031	0.85743
BMP	400(V4-V5)	No	MC	50000	family	SILVA	49136	141	723	0.997139	0.985499	0.991285
BMP	400(V4-V5)	No	MC	50000	genus	SILVA	32573	1195	16232	0.964611	0.667411	0.78895
BMP	400(V4-V5)	No	MC	100000	family	SILVA	98210	303	1487	0.996924	0.985085	0.990969
BMP	400(V4-V5)	No	MC	100000	genus	SILVA	64728	2366	32906	0.964736	0.662966	0.785877
BMP	400(V4-V5)	No	HC	25000	family	SILVA	22898	360	1742	0.984521	0.929302	0.956115
BMP	400(V4-V5)	No	HC	25000	genus	SILVA	18492	2903	3605	0.864314	0.836856	0.850363
BMP	400(V4-V5)	No	HC	50000	family	SILVA	45431	716	3853	0.984484	0.92182	0.952122
BMP	400(V4-V5)	No	HC	50000	genus	SILVA	36830	5712	7458	0.865733	0.831602	0.848324
BMP	400(V4-V5)	No	HC	100000	family	SILVA	90879	1436	7685	0.984445	0.92203	0.952216
BMP	400(V4-V5)	No	HC	100000	genus	SILVA	73595	11520	14885	0.864654	0.83177	0.847893
BMP	200(V3)	Yes	LC	25000	family	SILVA	20775	829	3396	0.961627	0.859501	0.907701
BMP	200(V3)	Yes	LC	25000	genus	SILVA	12125	3484	9391	0.776795	0.563534	0.653199
BMP	200(V3)	Yes	LC	50000	family	SILVA	39737	1957	8306	0.953063	0.827113	0.885632
BMP	200(V3)	Yes	LC	50000	genus	SILVA	24552	6780	18668	0.783608	0.56807	0.658654
BMP	200(V3)	Yes	LC	100000	family	SILVA	80356	3007	16637	0.963929	0.828472	0.891082
BMP	200(V3)	Yes	LC	100000	genus	SILVA	47425	17529	35046	0.730132	0.575051	0.643378
BMP	200(V3)	Yes	MC	25000	family	SILVA	23211	260	1529	0.988923	0.938197	0.962892
BMP	200(V3)	Yes	MC	25000	genus	SILVA	17331	2121	5548	0.890962	0.757507	0.818833
BMP	200(V3)	Yes	MC	50000	family	SILVA	46582	409	3009	0.991296	0.939324	0.96461
BMP	200(V3)	Yes	MC	50000	genus	SILVA	34442	5454	10104	0.863295	0.773178	0.815755
BMP	200(V3)	Yes	MC	100000	family	SILVA	92711	938	6351	0.989984	0.935889	0.962177
BMP	200(V3)	Yes	MC	100000	genus	SILVA	72862	5295	21843	0.932252	0.769357	0.843008
BMP	200(V3)	Yes	HC	25000	family	SILVA	19716	1089	4195	0.947657	0.824558	0.881832
BMP	200(V3)	Yes	HC	25000	genus	SILVA	15296	1995	7709	0.884622	0.664899	0.759182
BMP	200(V3)	Yes	HC	50000	family	SILVA	38884	2114	9002	0.948437	0.812012	0.874938
BMP	200(V3)	Yes	HC	50000	genus	SILVA	31156	4241	14603	0.880188	0.680872	0.767805
BMP	200(V3)	Yes	HC	100000	family	SILVA	79248	4179	16573	0.949908	0.827042	0.884227
BMP	200(V3)	Yes	HC	100000	genus	SILVA	64867	8211	26922	0.887641	0.706697	0.786901
BMP	400(V4-V5)	Yes	LC	25000	family	SILVA	20749	324	3927	0.984625	0.840858	0.90708
BMP	400(V4-V5)	Yes	LC	25000	genus	SILVA	11299	2080	11621	0.844532	0.492976	0.622552
BMP	400(V4-V5)	Yes	LC	50000	family	SILVA	41266	672	8062	0.983976	0.836563	0.904302
BMP	400(V4-V5)	Yes	LC	50000	genus	SILVA	22778	5248	21974	0.812745	0.508983	0.625958
BMP	400(V4-V5)	Yes	LC	100000	family	SILVA	80509	1414	18077	0.98274	0.816637	0.892022
BMP	400(V4-V5)	Yes	LC	100000	genus	SILVA	45239	12108	42653	0.788864	0.514711	0.622959
BMP	400(V4-V5)	Yes	MC	25000	family	SILVA	22347	93	2560	0.995856	0.897218	0.943967
BMP	400(V4-V5)	Yes	MC	25000	genus	SILVA	17019	2426	5555	0.875238	0.75392	0.810062
BMP	400(V4-V5)	Yes	MC	50000	family	SILVA	43490	169	6341	0.996129	0.87275	0.930367
BMP	400(V4-V5)	Yes	MC	50000	genus	SILVA	33097	2489	14414	0.930057	0.696618	0.796587
BMP	400(V4-V5)	Yes	MC	100000	family	SILVA	85488	299	14213	0.996515	0.857444	0.921763
BMP	400(V4-V5)	Yes	MC	100000	genus	SILVA	64902	4628	30470	0.933439	0.680514	0.787158
BMP	400(V4-V5)	Yes	HC	25000	family	SILVA	20234	415	4351	0.979902	0.823022	0.894637
BMP	400(V4-V5)	Yes	HC	25000	genus	SILVA	16582	2957	5461	0.848662	0.752257	0.797557
BMP	400(V4-V5)	Yes	HC	50000	family	SILVA	40418	857	8725	0.979237	0.822457	0.894026
BMP	400(V4-V5)	Yes	HC	50000	genus	SILVA	32441	5923	11636	0.84561	0.736007	0.787011
BMP	400(V4-V5)	Yes	HC	100000	family	SILVA	81486	1954	16560	0.976582	0.8311	0.897987
BMP	400(V4-V5)	Yes	HC	100000	genus	SILVA	66206	12094	21700	0.845543	0.753145	0.796674
kraken	200(V3)	No	LC	25000	family	MiniKraken DB	22711	0	2289	1	0.90844	0.952024
kraken	200(V3)	No	LC	25000	genus	MiniKraken DB	13978	0	11022	1	0.55912	0.717225
kraken	200(V3)	No	LC	50000	family	MiniKraken DB	45454	0	4546	1	0.90908	0.952375
kraken	200(V3)	No	LC	50000	genus	MiniKraken DB	27780	0	22220	1	0.5556	0.714322
kraken	200(V3)	No	LC	100000	family	MiniKraken DB	90751	0	9249	1	0.90751	0.951513
kraken	200(V3)	No	LC	100000	genus	MiniKraken DB	55318	0	44682	1	0.55318	0.712319
kraken	200(V3)	No	MC	25000	family	MiniKraken DB	24314	0	686	1	0.97256	0.986089
kraken	200(V3)	No	MC	25000	genus	MiniKraken DB	14089	0	10911	1	0.56356	0.720868
kraken	200(V3)	No	MC	50000	family	MiniKraken DB	48638	0	1362	1	0.97276	0.986192
kraken	200(V3)	No	MC	50000	genus	MiniKraken DB	28040	0	21960	1	0.5608	0.718606
kraken	200(V3)	No	MC	100000	family	MiniKraken DB	97369	0	2631	1	0.97369	0.98667
kraken	200(V3)	No	MC	100000	genus	MiniKraken DB	56035	0	43965	1	0.56035	0.718236
kraken	200(V3)	No	HC	25000	family	MiniKraken DB	21705	0	3295	1	0.8682	0.929451
kraken	200(V3)	No	HC	25000	genus	MiniKraken DB	19823	0	5177	1	0.79292	0.884501
kraken	200(V3)	No	HC	50000	family	MiniKraken DB	43434	0	6566	1	0.86868	0.929726
kraken	200(V3)	No	HC	50000	genus	MiniKraken DB	39329	0	10671	1	0.78658	0.880543
kraken	200(V3)	No	HC	100000	family	MiniKraken DB	86830	0	13170	1	0.8683	0.929508
kraken	200(V3)	No	HC	100000	genus	MiniKraken DB	79006	0	20994	1	0.79006	0.882719
kraken	400(V4-V5)	No	LC	25000	family	MiniKraken DB	24124	0	876	1	0.96496	0.982168
kraken	400(V4-V5)	No	LC	25000	genus	MiniKraken DB	23623	357	1020	0.985113	0.958609	0.97168
kraken	400(V4-V5)	No	LC	50000	family	MiniKraken DB	48273	0	1727	1	0.96546	0.982427
kraken	400(V4-V5)	No	LC	50000	genus	MiniKraken DB	47283	676	2041	0.985905	0.958621	0.972071
kraken	400(V4-V5)	No	LC	100000	family	MiniKraken DB	96540	0	3460	1	0.9654	0.982395
kraken	400(V4-V5)	No	LC	100000	genus	MiniKraken DB	94468	1346	4186	0.985952	0.957569	0.971553
kraken	400(V4-V5)	No	MC	25000	family	MiniKraken DB	24755	0	245	1	0.9902	0.995076
kraken	400(V4-V5)	No	MC	25000	genus	MiniKraken DB	24606	91	303	0.996315	0.987836	0.992057
kraken	400(V4-V5)	No	MC	50000	family	MiniKraken DB	49436	0	564	1	0.98872	0.994328
kraken	400(V4-V5)	No	MC	50000	genus	MiniKraken DB	49164	183	653	0.996292	0.986892	0.99157
kraken	400(V4-V5)	No	MC	100000	family	MiniKraken DB	98969	0	1031	1	0.98969	0.994818
kraken	400(V4-V5)	No	MC	100000	genus	MiniKraken DB	98470	354	1176	0.996418	0.988198	0.992291
kraken	400(V4-V5)	No	HC	25000	family	MiniKraken DB	23827	0	1173	1	0.95308	0.975976
kraken	400(V4-V5)	No	HC	25000	genus	MiniKraken DB	22986	524	1490	0.977712	0.939124	0.958029
kraken	400(V4-V5)	No	HC	50000	family	MiniKraken DB	47615	0	2385	1	0.9523	0.975567
kraken	400(V4-V5)	No	HC	50000	genus	MiniKraken DB	46255	928	2817	0.980332	0.942595	0.961093
kraken	400(V4-V5)	No	HC	100000	family	MiniKraken DB	95163	0	4837	1	0.95163	0.975216
kraken	400(V4-V5)	No	HC	100000	genus	MiniKraken DB	92233	1962	5805	0.979171	0.940788	0.959596
kraken	200(V3)	Yes	LC	25000	family	MiniKraken DB	18880	109	6011	0.99426	0.758507	0.860529
kraken	200(V3)	Yes	LC	25000	genus	MiniKraken DB	11616	107	13277	0.990873	0.466637	0.634477
kraken	200(V3)	Yes	LC	50000	family	MiniKraken DB	35861	207	13932	0.994261	0.720202	0.835327
kraken	200(V3)	Yes	LC	50000	genus	MiniKraken DB	23136	210	26654	0.991005	0.464672	0.632684
kraken	200(V3)	Yes	LC	100000	family	MiniKraken DB	69400	435	30165	0.993771	0.697032	0.819362
kraken	200(V3)	Yes	LC	100000	genus	MiniKraken DB	44930	459	54611	0.989887	0.451372	0.620023
kraken	200(V3)	Yes	MC	25000	family	MiniKraken DB	22175	91	2734	0.995913	0.89024	0.940117
kraken	200(V3)	Yes	MC	25000	genus	MiniKraken DB	12775	92	12133	0.99285	0.512887	0.676373
kraken	200(V3)	Yes	MC	50000	family	MiniKraken DB	44356	209	5435	0.99531	0.890844	0.940184
kraken	200(V3)	Yes	MC	50000	genus	MiniKraken DB	25335	232	24433	0.990926	0.509062	0.672596
kraken	200(V3)	Yes	MC	100000	family	MiniKraken DB	89079	414	10507	0.995374	0.894493	0.942241
kraken	200(V3)	Yes	MC	100000	genus	MiniKraken DB	50605	435	48960	0.991477	0.508261	0.672023
kraken	200(V3)	Yes	HC	25000	family	MiniKraken DB	17200	88	7712	0.99491	0.69043	0.815166
kraken	200(V3)	Yes	HC	25000	genus	MiniKraken DB	16022	115	8863	0.992874	0.643842	0.781142
kraken	200(V3)	Yes	HC	50000	family	MiniKraken DB	36067	232	13701	0.993609	0.724703	0.838114
kraken	200(V3)	Yes	HC	50000	genus	MiniKraken DB	31871	229	17900	0.992866	0.640353	0.778566
kraken	200(V3)	Yes	HC	100000	family	MiniKraken DB	69414	452	30134	0.99353	0.697292	0.81946
kraken	200(V3)	Yes	HC	100000	genus	MiniKraken DB	64089	459	35452	0.992889	0.643845	0.781149
kraken	400(V4-V5)	Yes	LC	25000	family	MiniKraken DB	22364	32	2604	0.998571	0.895707	0.944346
kraken	400(V4-V5)	Yes	LC	25000	genus	MiniKraken DB	21357	312	3331	0.985602	0.865076	0.921414
kraken	400(V4-V5)	Yes	LC	50000	family	MiniKraken DB	45050	100	4850	0.997785	0.902806	0.947922
kraken	400(V4-V5)	Yes	LC	50000	genus	MiniKraken DB	42586	630	6784	0.985422	0.862589	0.919923
kraken	400(V4-V5)	Yes	LC	100000	family	MiniKraken DB	92955	196	6849	0.997896	0.931375	0.963489
kraken	400(V4-V5)	Yes	LC	100000	genus	MiniKraken DB	87553	1233	11214	0.986113	0.88646	0.933635
kraken	400(V4-V5)	Yes	MC	25000	family	MiniKraken DB	24145	6	849	0.999752	0.966032	0.982603
kraken	400(V4-V5)	Yes	MC	25000	genus	MiniKraken DB	23207	95	1698	0.995923	0.931821	0.962806
kraken	400(V4-V5)	Yes	MC	50000	family	MiniKraken DB	48536	19	1445	0.999609	0.971089	0.985142
kraken	400(V4-V5)	Yes	MC	50000	genus	MiniKraken DB	46545	208	3247	0.995551	0.934789	0.964214
kraken	400(V4-V5)	Yes	MC	100000	family	MiniKraken DB	97847	64	2089	0.999346	0.979097	0.989118
kraken	400(V4-V5)	Yes	MC	100000	genus	MiniKraken DB	93569	390	6041	0.995849	0.939353	0.966777
kraken	400(V4-V5)	Yes	HC	25000	family	MiniKraken DB	22845	63	2092	0.99725	0.916109	0.954959
kraken	400(V4-V5)	Yes	HC	25000	genus	MiniKraken DB	21300	451	3249	0.979265	0.867652	0.920086
kraken	400(V4-V5)	Yes	HC	50000	family	MiniKraken DB	45216	137	4647	0.996979	0.906805	0.949756
kraken	400(V4-V5)	Yes	HC	50000	genus	MiniKraken DB	43707	867	5426	0.980549	0.889565	0.932844
kraken	400(V4-V5)	Yes	HC	100000	family	MiniKraken DB	89512	229	10259	0.997448	0.897175	0.944658
kraken	400(V4-V5)	Yes	HC	100000	genus	MiniKraken DB	87154	1734	11112	0.980492	0.886919	0.931361
mothur	200(V3)	No	LC	25000	family	SILVA	20481	637	3882	0.969836	0.84066	0.90064
mothur	200(V3)	No	LC	25000	genus	SILVA	10707	957	13336	0.917953	0.445327	0.599714
mothur	200(V3)	No	LC	50000	family	SILVA	41100	1267	7633	0.970095	0.843371	0.902305
mothur	200(V3)	No	LC	50000	genus	SILVA	21849	1947	26204	0.91818	0.454685	0.608192
mothur	200(V3)	No	LC	100000	family	SILVA	82194	2483	15323	0.970677	0.842868	0.902269
mothur	200(V3)	No	LC	100000	genus	SILVA	42591	3905	53504	0.916014	0.443218	0.597387
mothur	200(V3)	No	MC	25000	family	SILVA	23706	173	1121	0.992755	0.954848	0.973432
mothur	200(V3)	No	MC	25000	genus	SILVA	13281	315	11404	0.976831	0.538019	0.693869
mothur	200(V3)	No	MC	50000	family	SILVA	47293	385	2322	0.991925	0.9532	0.972177
mothur	200(V3)	No	MC	50000	genus	SILVA	26122	692	23186	0.974193	0.529772	0.686319
mothur	200(V3)	No	MC	100000	family	SILVA	94711	669	4620	0.992986	0.953489	0.972837
mothur	200(V3)	No	MC	100000	genus	SILVA	52445	1133	46422	0.978853	0.53046	0.688051
mothur	200(V3)	No	HC	25000	family	SILVA	18362	860	5778	0.95526	0.760646	0.846917
mothur	200(V3)	No	HC	25000	genus	SILVA	15225	1592	8183	0.905334	0.650419	0.756992
mothur	200(V3)	No	HC	50000	family	SILVA	36383	1726	11891	0.954709	0.753677	0.842365
mothur	200(V3)	No	HC	50000	genus	SILVA	29342	2717	17941	0.91525	0.620561	0.739633
mothur	200(V3)	No	HC	100000	family	SILVA	74729	3451	21820	0.955858	0.774001	0.85537
mothur	200(V3)	No	HC	100000	genus	SILVA	61059	6397	32544	0.905168	0.652319	0.758219
mothur	400(V4-V5)	No	LC	25000	family	SILVA	21393	482	3125	0.977966	0.872543	0.922251
mothur	400(V4-V5)	No	LC	25000	genus	SILVA	12124	984	11892	0.924931	0.50483	0.653162
mothur	400(V4-V5)	No	LC	50000	family	SILVA	42804	1039	6157	0.976302	0.874247	0.92246
mothur	400(V4-V5)	No	LC	50000	genus	SILVA	23844	2040	24116	0.921187	0.497164	0.645794
mothur	400(V4-V5)	No	LC	100000	family	SILVA	85713	2055	12232	0.976586	0.875114	0.923069
mothur	400(V4-V5)	No	LC	100000	genus	SILVA	48682	4175	47143	0.921013	0.50803	0.654847
mothur	400(V4-V5)	No	MC	25000	family	SILVA	23956	160	884	0.993365	0.964412	0.978675
mothur	400(V4-V5)	No	MC	25000	genus	SILVA	13451	296	11253	0.978468	0.544487	0.699644
mothur	400(V4-V5)	No	MC	50000	family	SILVA	47875	285	1840	0.994082	0.962989	0.978289
mothur	400(V4-V5)	No	MC	50000	genus	SILVA	26927	599	22474	0.978239	0.54507	0.700066
mothur	400(V4-V5)	No	MC	100000	family	SILVA	95734	585	3681	0.993926	0.962973	0.978205
mothur	400(V4-V5)	No	MC	100000	genus	SILVA	53646	1196	45158	0.978192	0.542954	0.698306
mothur	400(V4-V5)	No	HC	25000	family	SILVA	19944	737	4319	0.964363	0.821992	0.887504
mothur	400(V4-V5)	No	HC	25000	genus	SILVA	17199	1484	6317	0.92057	0.731374	0.815138
mothur	400(V4-V5)	No	HC	50000	family	SILVA	39942	1489	8569	0.964061	0.82336	0.888172
mothur	400(V4-V5)	No	HC	50000	genus	SILVA	34240	2878	12882	0.922463	0.726625	0.812915
mothur	400(V4-V5)	No	HC	100000	family	SILVA	79767	2872	17361	0.965246	0.821256	0.887449
mothur	400(V4-V5)	No	HC	100000	genus	SILVA	68012	5815	26173	0.921235	0.722111	0.809609
mothur	200(V3)	Yes	LC	25000	family	SILVA	17911	268	6821	0.985258	0.724203	0.834798
mothur	200(V3)	Yes	LC	25000	genus	SILVA	8257	538	16205	0.938829	0.337544	0.496557
mothur	200(V3)	Yes	LC	50000	family	SILVA	36216	539	13245	0.985335	0.732213	0.840122
mothur	200(V3)	Yes	LC	50000	genus	SILVA	16388	1124	32488	0.935815	0.335297	0.493704
mothur	200(V3)	Yes	LC	100000	family	SILVA	73078	1075	25847	0.985503	0.738721	0.844452
mothur	200(V3)	Yes	LC	100000	genus	SILVA	33852	2266	63882	0.937261	0.346369	0.505812
mothur	200(V3)	Yes	MC	25000	family	SILVA	21623	81	3296	0.996268	0.867731	0.927568
mothur	200(V3)	Yes	MC	25000	genus	SILVA	11932	175	12893	0.985546	0.480645	0.646161
mothur	200(V3)	Yes	MC	50000	family	SILVA	43194	199	6607	0.995414	0.867332	0.92697
mothur	200(V3)	Yes	MC	50000	genus	SILVA	23781	386	25833	0.984028	0.47932	0.644638
mothur	200(V3)	Yes	MC	100000	family	SILVA	86435	317	13248	0.996346	0.867099	0.92724
mothur	200(V3)	Yes	MC	100000	genus	SILVA	47350	700	51950	0.985432	0.476838	0.642687
mothur	200(V3)	Yes	HC	25000	family	SILVA	15071	266	9663	0.982656	0.609323	0.752215
mothur	200(V3)	Yes	HC	25000	genus	SILVA	10945	662	13393	0.942965	0.449708	0.608986
mothur	200(V3)	Yes	HC	50000	family	SILVA	30448	771	18781	0.975304	0.618497	0.756961
mothur	200(V3)	Yes	HC	50000	genus	SILVA	22514	1557	25929	0.935316	0.464752	0.620956
mothur	200(V3)	Yes	HC	100000	family	SILVA	61832	1451	36717	0.977071	0.627424	0.76415
mothur	200(V3)	Yes	HC	100000	genus	SILVA	45297	3103	51600	0.935888	0.467476	0.623509
mothur	400(V4-V5)	Yes	LC	25000	family	SILVA	19918	343	4739	0.983071	0.807803	0.886861
mothur	400(V4-V5)	Yes	LC	25000	genus	SILVA	9636	683	14681	0.933811	0.396266	0.556415
mothur	400(V4-V5)	Yes	LC	50000	family	SILVA	39883	778	9339	0.980866	0.810268	0.887443
mothur	400(V4-V5)	Yes	LC	50000	genus	SILVA	19680	1443	28877	0.931686	0.405297	0.564868
mothur	400(V4-V5)	Yes	LC	100000	family	SILVA	79737	1333	18930	0.983557	0.808143	0.887263
mothur	400(V4-V5)	Yes	LC	100000	genus	SILVA	38554	2693	58753	0.93471	0.39621	0.556519
mothur	400(V4-V5)	Yes	MC	25000	family	SILVA	22223	115	2662	0.994852	0.893028	0.941194
mothur	400(V4-V5)	Yes	MC	25000	genus	SILVA	12141	247	12612	0.980061	0.490486	0.653779
mothur	400(V4-V5)	Yes	MC	50000	family	SILVA	44456	188	5356	0.995789	0.892476	0.941306
mothur	400(V4-V5)	Yes	MC	50000	genus	SILVA	24419	467	25114	0.981234	0.492984	0.656257
mothur	400(V4-V5)	Yes	MC	100000	family	SILVA	88890	396	10714	0.995565	0.892434	0.941183
mothur	400(V4-V5)	Yes	MC	100000	genus	SILVA	48647	893	50460	0.981974	0.490853	0.654531
mothur	400(V4-V5)	Yes	HC	25000	family	SILVA	18931	504	5565	0.974067	0.77282	0.861852
mothur	400(V4-V5)	Yes	HC	25000	genus	SILVA	14239	936	9825	0.93832	0.591714	0.725758
mothur	400(V4-V5)	Yes	HC	50000	family	SILVA	37550	1155	11295	0.970159	0.768758	0.857796
mothur	400(V4-V5)	Yes	HC	50000	genus	SILVA	28419	1965	19616	0.935328	0.591631	0.724799
mothur	400(V4-V5)	Yes	HC	100000	family	SILVA	75679	1994	22327	0.974328	0.772187	0.86156
mothur	400(V4-V5)	Yes	HC	100000	genus	SILVA	56829	3651	39520	0.939633	0.589824	0.724726
mothur	200(V3)	No	LC	25000	family	Greengenes	22715	639	1646	0.972639	0.932433	0.952111
mothur	200(V3)	No	LC	25000	genus	Greengenes	11699	10184	3117	0.534616	0.789619	0.637565
mothur	200(V3)	No	LC	50000	family	Greengenes	45556	1029	3415	0.977911	0.930265	0.953493
mothur	200(V3)	No	LC	50000	genus	Greengenes	23224	19975	6801	0.537605	0.773489	0.634328
mothur	200(V3)	No	LC	100000	family	Greengenes	90676	2401	6923	0.974204	0.929067	0.9511
mothur	200(V3)	No	LC	100000	genus	Greengenes	45730	39482	14788	0.536662	0.755643	0.627599
mothur	200(V3)	No	MC	25000	family	Greengenes	24269	148	583	0.993939	0.976541	0.985163
mothur	200(V3)	No	MC	25000	genus	Greengenes	13451	10632	917	0.558527	0.936178	0.699644
mothur	200(V3)	No	MC	50000	family	Greengenes	48317	292	1391	0.993993	0.972017	0.982882
mothur	200(V3)	No	MC	50000	genus	Greengenes	26554	21344	2102	0.554386	0.926647	0.693733
mothur	200(V3)	No	MC	100000	family	Greengenes	96927	560	2513	0.994256	0.974728	0.984395
mothur	200(V3)	No	MC	100000	genus	Greengenes	53500	43002	3498	0.554393	0.938629	0.697068
mothur	200(V3)	No	HC	25000	family	Greengenes	21895	605	2500	0.973111	0.89752	0.933788
mothur	200(V3)	No	HC	25000	genus	Greengenes	16532	3602	4866	0.821099	0.772596	0.796109
mothur	200(V3)	No	HC	50000	family	Greengenes	43255	1737	5008	0.961393	0.896235	0.927671
mothur	200(V3)	No	HC	50000	genus	Greengenes	31872	7030	11098	0.819289	0.741727	0.778581
mothur	200(V3)	No	HC	100000	family	Greengenes	87799	2885	9316	0.968186	0.904072	0.935032
mothur	200(V3)	No	HC	100000	genus	Greengenes	69129	15749	15122	0.814451	0.820513	0.817471
mothur	400(V4-V5)	No	LC	25000	family	Greengenes	22788	494	1718	0.978782	0.929895	0.953712
mothur	400(V4-V5)	No	LC	25000	genus	Greengenes	12852	9760	2388	0.568371	0.843307	0.679066
mothur	400(V4-V5)	No	LC	50000	family	Greengenes	45537	1000	3463	0.978512	0.929327	0.953285
mothur	400(V4-V5)	No	LC	50000	genus	Greengenes	25919	19208	4873	0.574357	0.841745	0.682807
mothur	400(V4-V5)	No	LC	100000	family	Greengenes	91330	2046	6624	0.978089	0.932376	0.954686
mothur	400(V4-V5)	No	LC	100000	genus	Greengenes	51670	39008	9322	0.569818	0.84716	0.681348
mothur	400(V4-V5)	No	MC	25000	family	Greengenes	24285	202	513	0.991751	0.979313	0.985493
mothur	400(V4-V5)	No	MC	25000	genus	Greengenes	13694	10647	659	0.56259	0.954086	0.70781
mothur	400(V4-V5)	No	MC	50000	family	Greengenes	48558	383	1059	0.992174	0.978657	0.985369
mothur	400(V4-V5)	No	MC	50000	genus	Greengenes	27484	21177	1339	0.564805	0.953544	0.709411
mothur	400(V4-V5)	No	MC	100000	family	Greengenes	97353	599	2048	0.993885	0.979397	0.986587
mothur	400(V4-V5)	No	MC	100000	genus	Greengenes	54705	42511	2784	0.562716	0.951573	0.707217
mothur	400(V4-V5)	No	HC	25000	family	Greengenes	21638	992	2370	0.956164	0.901283	0.927913
mothur	400(V4-V5)	No	HC	25000	genus	Greengenes	18228	3670	3102	0.832405	0.854571	0.843342
mothur	400(V4-V5)	No	HC	50000	family	Greengenes	43793	1472	4735	0.96748	0.902427	0.933822
mothur	400(V4-V5)	No	HC	50000	genus	Greengenes	36644	6747	6609	0.844507	0.847201	0.845852
mothur	400(V4-V5)	No	HC	100000	family	Greengenes	87430	2949	9621	0.967371	0.900867	0.932935
mothur	400(V4-V5)	No	HC	100000	genus	Greengenes	72897	13667	13436	0.842117	0.84437	0.843242
mothur	200(V3)	Yes	LC	25000	family	Greengenes	18669	402	5929	0.978921	0.758964	0.855023
mothur	200(V3)	Yes	LC	25000	genus	Greengenes	8806	729	15465	0.923545	0.36282	0.520973
mothur	200(V3)	Yes	LC	50000	family	Greengenes	37096	845	12059	0.977729	0.754674	0.851842
mothur	200(V3)	Yes	LC	50000	genus	Greengenes	17565	1433	31002	0.924571	0.361665	0.519944
mothur	200(V3)	Yes	LC	100000	family	Greengenes	75522	1655	22823	0.978556	0.767929	0.860542
mothur	200(V3)	Yes	LC	100000	genus	Greengenes	34894	2705	62401	0.928057	0.358641	0.517354
mothur	200(V3)	Yes	MC	25000	family	Greengenes	21817	108	3075	0.995074	0.876466	0.932012
mothur	200(V3)	Yes	MC	25000	genus	Greengenes	12107	200	12693	0.983749	0.488185	0.652545
mothur	200(V3)	Yes	MC	50000	family	Greengenes	43565	262	6173	0.994022	0.87589	0.931224
mothur	200(V3)	Yes	MC	50000	genus	Greengenes	24164	443	25393	0.981997	0.4876	0.651637
mothur	200(V3)	Yes	MC	100000	family	Greengenes	87161	475	12364	0.99458	0.87577	0.931401
mothur	200(V3)	Yes	MC	100000	genus	Greengenes	48251	808	50941	0.98353	0.48644	0.650937
mothur	200(V3)	Yes	HC	25000	family	Greengenes	16024	507	8469	0.96933	0.654228	0.781201
mothur	200(V3)	Yes	HC	25000	genus	Greengenes	12068	918	12014	0.929308	0.501121	0.651128
mothur	200(V3)	Yes	HC	50000	family	Greengenes	32576	1056	16368	0.968601	0.665577	0.788994
mothur	200(V3)	Yes	HC	50000	genus	Greengenes	24086	1885	24029	0.927419	0.500592	0.650217
mothur	200(V3)	Yes	HC	100000	family	Greengenes	65536	2097	32367	0.968994	0.669397	0.791804
mothur	200(V3)	Yes	HC	100000	genus	Greengenes	48474	3874	47652	0.925995	0.504276	0.652963
mothur	400(V4-V5)	Yes	LC	25000	family	Greengenes	22093	318	2589	0.985811	0.895106	0.938271
mothur	400(V4-V5)	Yes	LC	25000	genus	Greengenes	11873	4594	8533	0.721018	0.581839	0.643994
mothur	400(V4-V5)	Yes	LC	50000	family	Greengenes	44188	687	5125	0.984691	0.896072	0.938294
mothur	400(V4-V5)	Yes	LC	50000	genus	Greengenes	24143	9511	16346	0.717389	0.596285	0.651255
mothur	400(V4-V5)	Yes	LC	100000	family	Greengenes	88570	1348	10082	0.985009	0.897802	0.939386
mothur	400(V4-V5)	Yes	LC	100000	genus	Greengenes	48133	17852	34015	0.729454	0.58593	0.649862
mothur	400(V4-V5)	Yes	MC	25000	family	Greengenes	22918	116	1966	0.994964	0.920993	0.956551
mothur	400(V4-V5)	Yes	MC	25000	genus	Greengenes	12898	2402	9700	0.843007	0.570758	0.680669
mothur	400(V4-V5)	Yes	MC	50000	family	Greengenes	45779	187	4034	0.995932	0.919017	0.95593
mothur	400(V4-V5)	Yes	MC	50000	genus	Greengenes	25831	4658	19511	0.847224	0.569693	0.681278
mothur	400(V4-V5)	Yes	MC	100000	family	Greengenes	91575	404	8021	0.995608	0.919465	0.956022
mothur	400(V4-V5)	Yes	MC	100000	genus	Greengenes	51555	9290	39155	0.847317	0.56835	0.680347
mothur	400(V4-V5)	Yes	HC	25000	family	Greengenes	21994	506	2500	0.977511	0.897934	0.936034
mothur	400(V4-V5)	Yes	HC	25000	genus	Greengenes	17400	1747	5853	0.908759	0.748291	0.820755
mothur	400(V4-V5)	Yes	HC	50000	family	Greengenes	43680	1011	5309	0.977378	0.891629	0.932536
mothur	400(V4-V5)	Yes	HC	50000	genus	Greengenes	34636	3395	11969	0.910731	0.743182	0.81847
mothur	400(V4-V5)	Yes	HC	100000	family	Greengenes	87660	1912	10428	0.978654	0.893687	0.934243
mothur	400(V4-V5)	Yes	HC	100000	genus	Greengenes	69507	7165	23328	0.90655	0.748715	0.820108
One Codex	200(V3)	No	LC	25000	family	RefSeq 65	23403	175	1422	0.992578	0.942719	0.967006
One Codex	200(V3)	No	LC	25000	genus	RefSeq 65	15154	175	9671	0.988584	0.610433	0.754794
One Codex	200(V3)	No	LC	50000	family	RefSeq 65	46826	341	2833	0.99277	0.942951	0.96722
One Codex	200(V3)	No	LC	50000	genus	RefSeq 65	30208	341	19451	0.988838	0.608309	0.753242
One Codex	200(V3)	No	LC	100000	family	RefSeq 65	93419	703	5878	0.992531	0.940804	0.965975
One Codex	200(V3)	No	LC	100000	genus	RefSeq 65	60043	703	39254	0.988427	0.604681	0.750336
One Codex	200(V3)	No	MC	25000	family	RefSeq 65	24538	45	417	0.998169	0.98329	0.990674
One Codex	200(V3)	No	MC	25000	genus	RefSeq 65	14467	45	10488	0.996899	0.579724	0.733119
One Codex	200(V3)	No	MC	50000	family	RefSeq 65	49016	103	881	0.997903	0.982344	0.990062
One Codex	200(V3)	No	MC	50000	genus	RefSeq 65	28731	103	21166	0.996428	0.575806	0.729852
One Codex	200(V3)	No	MC	100000	family	RefSeq 65	98171	186	1643	0.998109	0.983539	0.990771
One Codex	200(V3)	No	MC	100000	genus	RefSeq 65	57439	186	42375	0.996772	0.57546	0.729667
One Codex	200(V3)	No	HC	25000	family	RefSeq 65	22710	234	2056	0.989801	0.916983	0.952002
One Codex	200(V3)	No	HC	25000	genus	RefSeq 65	21521	234	3245	0.989244	0.868974	0.925217
One Codex	200(V3)	No	HC	50000	family	RefSeq 65	45364	467	4169	0.98981	0.915834	0.951386
One Codex	200(V3)	No	HC	50000	genus	RefSeq 65	42727	467	6806	0.989188	0.862597	0.921565
One Codex	200(V3)	No	HC	100000	family	RefSeq 65	90708	965	8327	0.989473	0.915919	0.951276
One Codex	200(V3)	No	HC	100000	genus	RefSeq 65	85824	965	13211	0.988881	0.866603	0.923713
One Codex	400(V4-V5)	No	LC	25000	family	RefSeq 65	24286	0	714	1	0.97144	0.985513
One Codex	400(V4-V5)	No	LC	25000	genus	RefSeq 65	23958	357	685	0.985318	0.972203	0.978716
One Codex	400(V4-V5)	No	LC	50000	family	RefSeq 65	48608	0	1392	1	0.97216	0.985883
One Codex	400(V4-V5)	No	LC	50000	genus	RefSeq 65	47973	676	1351	0.986105	0.97261	0.979311
One Codex	400(V4-V5)	No	LC	100000	family	RefSeq 65	97192	0	2808	1	0.97192	0.98576
One Codex	400(V4-V5)	No	LC	100000	genus	RefSeq 65	95839	1346	2815	0.98615	0.971466	0.978753
One Codex	400(V4-V5)	No	MC	25000	family	RefSeq 65	24804	0	196	1	0.99216	0.996065
One Codex	400(V4-V5)	No	MC	25000	genus	RefSeq 65	24690	91	219	0.996328	0.991208	0.993761
One Codex	400(V4-V5)	No	MC	50000	family	RefSeq 65	49622	0	378	1	0.99244	0.996206
One Codex	400(V4-V5)	No	MC	50000	genus	RefSeq 65	49432	185	383	0.996271	0.992312	0.994288
One Codex	400(V4-V5)	No	MC	100000	family	RefSeq 65	99180	0	820	1	0.9918	0.995883
One Codex	400(V4-V5)	No	MC	100000	genus	RefSeq 65	98858	354	788	0.996432	0.992092	0.994257
One Codex	400(V4-V5)	No	HC	25000	family	RefSeq 65	24054	0	946	1	0.96216	0.980715
One Codex	400(V4-V5)	No	HC	25000	genus	RefSeq 65	23487	524	989	0.978177	0.959593	0.968796
One Codex	400(V4-V5)	No	HC	50000	family	RefSeq 65	48090	0	1910	1	0.9618	0.980528
One Codex	400(V4-V5)	No	HC	50000	genus	RefSeq 65	47179	928	1893	0.98071	0.961424	0.970971
One Codex	400(V4-V5)	No	HC	100000	family	RefSeq 65	96150	0	3850	1	0.9615	0.980372
One Codex	400(V4-V5)	No	HC	100000	genus	RefSeq 65	94203	1962	3835	0.979598	0.960883	0.97015
One Codex	200(V3)	Yes	LC	25000	family	RefSeq 65	22648	284	2068	0.987616	0.91633	0.950638
One Codex	200(V3)	Yes	LC	25000	genus	RefSeq 65	14708	304	9988	0.97975	0.595562	0.740808
One Codex	200(V3)	Yes	LC	50000	family	RefSeq 65	45296	579	4125	0.987379	0.916533	0.950638
One Codex	200(V3)	Yes	LC	50000	genus	RefSeq 65	29297	608	20095	0.979669	0.593153	0.738918
One Codex	200(V3)	Yes	LC	100000	family	RefSeq 65	90291	1174	8535	0.987164	0.913636	0.948978
One Codex	200(V3)	Yes	LC	100000	genus	RefSeq 65	58280	1246	40474	0.979068	0.590153	0.736416
One Codex	200(V3)	Yes	MC	25000	family	RefSeq 65	23966	123	911	0.994894	0.96338	0.978883
One Codex	200(V3)	Yes	MC	25000	genus	RefSeq 65	14374	128	10498	0.991174	0.577919	0.730126
One Codex	200(V3)	Yes	MC	50000	family	RefSeq 65	47857	263	1880	0.994534	0.962201	0.978101
One Codex	200(V3)	Yes	MC	50000	genus	RefSeq 65	28583	267	21150	0.990745	0.574729	0.72746
One Codex	200(V3)	Yes	MC	100000	family	RefSeq 65	95865	459	3676	0.995235	0.96307	0.978889
One Codex	200(V3)	Yes	MC	100000	genus	RefSeq 65	57172	481	42347	0.991657	0.574483	0.727509
One Codex	200(V3)	Yes	HC	25000	family	RefSeq 65	22425	336	2239	0.985238	0.90922	0.945704
One Codex	200(V3)	Yes	HC	25000	genus	RefSeq 65	20715	354	3931	0.983198	0.840502	0.906267
One Codex	200(V3)	Yes	HC	50000	family	RefSeq 65	44820	648	4532	0.985748	0.90817	0.94537
One Codex	200(V3)	Yes	HC	50000	genus	RefSeq 65	41174	688	8138	0.983565	0.834969	0.903196
One Codex	200(V3)	Yes	HC	100000	family	RefSeq 65	89558	1329	9113	0.985377	0.907643	0.944914
One Codex	200(V3)	Yes	HC	100000	genus	RefSeq 65	82778	1419	15803	0.983147	0.839695	0.905776
One Codex	400(V4-V5)	Yes	LC	25000	family	RefSeq 65	24199	72	729	0.997033	0.970756	0.983719
One Codex	400(V4-V5)	Yes	LC	25000	genus	RefSeq 65	23809	518	673	0.978707	0.97251	0.975599
One Codex	400(V4-V5)	Yes	LC	50000	family	RefSeq 65	48427	160	1413	0.996707	0.971649	0.984019
One Codex	400(V4-V5)	Yes	LC	50000	genus	RefSeq 65	47637	1000	1363	0.97944	0.972184	0.975798
One Codex	400(V4-V5)	Yes	LC	100000	family	RefSeq 65	96817	352	2831	0.996377	0.97159	0.983828
One Codex	400(V4-V5)	Yes	LC	100000	genus	RefSeq 65	95200	2053	2747	0.97889	0.971954	0.97541
One Codex	400(V4-V5)	Yes	MC	25000	family	RefSeq 65	24773	24	203	0.999032	0.991872	0.995439
One Codex	400(V4-V5)	Yes	MC	25000	genus	RefSeq 65	24622	137	241	0.994467	0.990307	0.992382
One Codex	400(V4-V5)	Yes	MC	50000	family	RefSeq 65	49571	41	388	0.999174	0.992234	0.995692
One Codex	400(V4-V5)	Yes	MC	50000	genus	RefSeq 65	49286	291	423	0.99413	0.99149	0.992809
One Codex	400(V4-V5)	Yes	MC	100000	family	RefSeq 65	99071	94	835	0.999052	0.991642	0.995333
One Codex	400(V4-V5)	Yes	MC	100000	genus	RefSeq 65	98535	568	897	0.994269	0.990979	0.992621
One Codex	400(V4-V5)	Yes	HC	25000	family	RefSeq 65	23939	103	958	0.995716	0.961521	0.97832
One Codex	400(V4-V5)	Yes	HC	25000	genus	RefSeq 65	23293	757	950	0.968524	0.960813	0.964653
One Codex	400(V4-V5)	Yes	HC	50000	family	RefSeq 65	47860	219	1921	0.995445	0.961411	0.978132
One Codex	400(V4-V5)	Yes	HC	50000	genus	RefSeq 65	46800	1390	1810	0.971156	0.962765	0.966942
One Codex	400(V4-V5)	Yes	HC	100000	family	RefSeq 65	95693	417	3890	0.995661	0.960937	0.977991
One Codex	400(V4-V5)	Yes	HC	100000	genus	RefSeq 65	93431	2920	3649	0.969694	0.962412	0.96604
One Codex	200(V3)	No	LC	25000	family	One Codex 28k	21894	175	2931	0.99207	0.881934	0.933766
One Codex	200(V3)	No	LC	25000	genus	One Codex 28k	13642	175	11183	0.987334	0.549527	0.706071
One Codex	200(V3)	No	LC	50000	family	One Codex 28k	43679	341	5980	0.992254	0.879579	0.932525
One Codex	200(V3)	No	LC	50000	genus	One Codex 28k	27127	341	22532	0.987586	0.546266	0.703437
One Codex	200(V3)	No	LC	100000	family	One Codex 28k	87405	703	11892	0.992021	0.880238	0.932793
One Codex	200(V3)	No	LC	100000	genus	One Codex 28k	54067	703	45230	0.987165	0.544498	0.701863
One Codex	200(V3)	No	MC	25000	family	One Codex 28k	24094	45	861	0.998136	0.965498	0.981546
One Codex	200(V3)	No	MC	25000	genus	One Codex 28k	14019	45	10936	0.9968	0.561771	0.718573
One Codex	200(V3)	No	MC	50000	family	One Codex 28k	48124	103	1773	0.997864	0.964467	0.980881
One Codex	200(V3)	No	MC	50000	genus	One Codex 28k	27833	103	22064	0.996313	0.557809	0.715198
One Codex	200(V3)	No	MC	100000	family	One Codex 28k	96394	186	3420	0.998074	0.965736	0.981639
One Codex	200(V3)	No	MC	100000	genus	One Codex 28k	55659	186	44155	0.996669	0.557627	0.71514
One Codex	200(V3)	No	HC	25000	family	One Codex 28k	20566	234	4200	0.98875	0.830413	0.902691
One Codex	200(V3)	No	HC	25000	genus	One Codex 28k	19370	234	5396	0.988064	0.782121	0.873112
One Codex	200(V3)	No	HC	50000	family	One Codex 28k	41072	467	8461	0.988758	0.829185	0.901968
One Codex	200(V3)	No	HC	50000	genus	One Codex 28k	38432	467	11101	0.987995	0.775887	0.869188
One Codex	200(V3)	No	HC	100000	family	One Codex 28k	81961	965	17074	0.988363	0.827596	0.900863
One Codex	200(V3)	No	HC	100000	genus	One Codex 28k	77067	965	21968	0.987633	0.778179	0.870484
One Codex	400(V4-V5)	No	LC	25000	family	One Codex 28k	22383	0	2617	1	0.89532	0.944769
One Codex	400(V4-V5)	No	LC	25000	genus	One Codex 28k	21895	171	2934	0.992251	0.881832	0.933788
One Codex	400(V4-V5)	No	LC	50000	family	One Codex 28k	44853	0	5147	1	0.89706	0.945737
One Codex	400(V4-V5)	No	LC	50000	genus	One Codex 28k	43906	313	5781	0.992922	0.883652	0.935105
One Codex	400(V4-V5)	No	LC	100000	family	One Codex 28k	89699	0	10301	1	0.89699	0.945698
One Codex	400(V4-V5)	No	LC	100000	genus	One Codex 28k	87672	689	11639	0.992202	0.882803	0.934311
One Codex	400(V4-V5)	No	MC	25000	family	One Codex 28k	24249	0	751	1	0.96996	0.984751
One Codex	400(V4-V5)	No	MC	25000	genus	One Codex 28k	24088	42	870	0.998259	0.965141	0.981421
One Codex	400(V4-V5)	No	MC	50000	family	One Codex 28k	48515	0	1485	1	0.9703	0.984926
One Codex	400(V4-V5)	No	MC	50000	genus	One Codex 28k	48217	98	1685	0.997972	0.966234	0.981846
One Codex	400(V4-V5)	No	MC	100000	family	One Codex 28k	96927	0	3073	1	0.96927	0.984395
One Codex	400(V4-V5)	No	MC	100000	genus	One Codex 28k	96391	194	3415	0.997991	0.965784	0.981623
One Codex	400(V4-V5)	No	HC	25000	family	One Codex 28k	21478	0	3522	1	0.85912	0.924222
One Codex	400(V4-V5)	No	HC	25000	genus	One Codex 28k	20687	255	4058	0.987824	0.836007	0.905597
One Codex	400(V4-V5)	No	HC	50000	family	One Codex 28k	42721	0	7279	1	0.85442	0.921496
One Codex	400(V4-V5)	No	HC	50000	genus	One Codex 28k	41357	463	8180	0.988929	0.834871	0.905393
One Codex	400(V4-V5)	No	HC	100000	family	One Codex 28k	85571	0	14429	1	0.85571	0.922245
One Codex	400(V4-V5)	No	HC	100000	genus	One Codex 28k	82582	1020	16398	0.987799	0.83433	0.904602
One Codex	200(V3)	Yes	LC	25000	family	One Codex 28k	15406	6547	3047	0.701772	0.834878	0.76256
One Codex	200(V3)	Yes	LC	25000	genus	One Codex 28k	12961	6784	5255	0.656419	0.711517	0.682859
One Codex	200(V3)	Yes	LC	50000	family	One Codex 28k	30836	13184	5980	0.7005	0.837571	0.762927
One Codex	200(V3)	Yes	LC	50000	genus	One Codex 28k	25878	13617	10505	0.655222	0.711266	0.682095
One Codex	200(V3)	Yes	LC	100000	family	One Codex 28k	61320	26723	11957	0.696478	0.836825	0.760228
One Codex	200(V3)	Yes	LC	100000	genus	One Codex 28k	51537	27550	20913	0.651649	0.711346	0.68019
One Codex	200(V3)	Yes	MC	25000	family	One Codex 28k	17422	6392	1186	0.731586	0.936264	0.821366
One Codex	200(V3)	Yes	MC	25000	genus	One Codex 28k	13897	6436	4667	0.68347	0.748599	0.714554
One Codex	200(V3)	Yes	MC	50000	family	One Codex 28k	34858	12799	2343	0.731435	0.937018	0.821561
One Codex	200(V3)	Yes	MC	50000	genus	One Codex 28k	27619	12886	9495	0.681866	0.744167	0.711656
One Codex	200(V3)	Yes	MC	100000	family	One Codex 28k	69662	25841	4497	0.729422	0.93936	0.821186
One Codex	200(V3)	Yes	MC	100000	genus	One Codex 28k	55319	26074	18607	0.679653	0.748302	0.712328
One Codex	200(V3)	Yes	HC	25000	family	One Codex 28k	18740	2767	3493	0.871344	0.842891	0.856882
One Codex	200(V3)	Yes	HC	25000	genus	One Codex 28k	18257	3049	3694	0.856895	0.831716	0.844118
One Codex	200(V3)	Yes	HC	50000	family	One Codex 28k	37415	5714	6871	0.867514	0.844849	0.856032
One Codex	200(V3)	Yes	HC	50000	genus	One Codex 28k	36393	6200	7407	0.854436	0.83089	0.842499
One Codex	200(V3)	Yes	HC	100000	family	One Codex 28k	74799	11406	13795	0.867687	0.84429	0.855829
One Codex	200(V3)	Yes	HC	100000	genus	One Codex 28k	72902	12506	14592	0.853573	0.833223	0.843275
One Codex	400(V4-V5)	Yes	LC	25000	family	One Codex 28k	23097	628	1275	0.97353	0.947686	0.960434
One Codex	400(V4-V5)	Yes	LC	25000	genus	One Codex 28k	22467	933	1600	0.960128	0.933519	0.946637
One Codex	400(V4-V5)	Yes	LC	50000	family	One Codex 28k	46293	1200	2507	0.974733	0.948627	0.961503
One Codex	400(V4-V5)	Yes	LC	50000	genus	One Codex 28k	45086	1806	3108	0.961486	0.935511	0.94832
One Codex	400(V4-V5)	Yes	LC	100000	family	One Codex 28k	92593	2520	4887	0.973505	0.949867	0.961541
One Codex	400(V4-V5)	Yes	LC	100000	genus	One Codex 28k	89993	3854	6153	0.958933	0.936004	0.94733
One Codex	400(V4-V5)	Yes	MC	25000	family	One Codex 28k	24455	175	370	0.992895	0.985096	0.98898
One Codex	400(V4-V5)	Yes	MC	25000	genus	One Codex 28k	24087	258	655	0.989402	0.973527	0.9814
One Codex	400(V4-V5)	Yes	MC	50000	family	One Codex 28k	48942	336	722	0.993182	0.985462	0.989307
One Codex	400(V4-V5)	Yes	MC	50000	genus	One Codex 28k	48222	545	1233	0.988824	0.975068	0.981898
One Codex	400(V4-V5)	Yes	MC	100000	family	One Codex 28k	97846	731	1423	0.992584	0.985665	0.989113
One Codex	400(V4-V5)	Yes	MC	100000	genus	One Codex 28k	96428	1166	2406	0.988053	0.975656	0.981815
One Codex	400(V4-V5)	Yes	HC	25000	family	One Codex 28k	22499	792	1709	0.965995	0.929404	0.947346
One Codex	400(V4-V5)	Yes	HC	25000	genus	One Codex 28k	21578	1234	2188	0.945906	0.907936	0.926532
One Codex	400(V4-V5)	Yes	HC	50000	family	One Codex 28k	44887	1701	3412	0.963488	0.929357	0.946115
One Codex	400(V4-V5)	Yes	HC	50000	genus	One Codex 28k	43217	2610	4173	0.943047	0.911943	0.927234
One Codex	400(V4-V5)	Yes	HC	100000	family	One Codex 28k	89733	3359	6908	0.963917	0.928519	0.945887
One Codex	400(V4-V5)	Yes	HC	100000	genus	One Codex 28k	86229	5291	8480	0.942187	0.910463	0.926053
One Codex	200(V3)	No	LC	25000	family	SILVA	8114	0	16886	1	0.32456	0.490065
One Codex	200(V3)	No	LC	25000	genus	SILVA	7453	161	17386	0.978855	0.300052	0.45931
One Codex	200(V3)	No	LC	50000	family	SILVA	16158	0	33842	1	0.32316	0.488467
One Codex	200(V3)	No	LC	50000	genus	SILVA	14797	316	34887	0.979091	0.297822	0.456719
One Codex	200(V3)	No	LC	100000	family	SILVA	32436	0	67564	1	0.32436	0.489837
One Codex	200(V3)	No	LC	100000	genus	SILVA	29673	686	69641	0.977404	0.29878	0.457659
One Codex	200(V3)	No	MC	25000	family	SILVA	12485	0	12515	1	0.4994	0.666133
One Codex	200(V3)	No	MC	25000	genus	SILVA	12271	53	12676	0.995699	0.491883	0.658474
One Codex	200(V3)	No	MC	50000	family	SILVA	24532	0	25468	1	0.49064	0.658294
One Codex	200(V3)	No	MC	50000	genus	SILVA	24123	89	25788	0.996324	0.48332	0.650891
One Codex	200(V3)	No	MC	100000	family	SILVA	49282	0	50718	1	0.49282	0.660254
One Codex	200(V3)	No	MC	100000	genus	SILVA	48434	193	51373	0.996031	0.485277	0.6526
One Codex	200(V3)	No	HC	25000	family	SILVA	11604	0	13396	1	0.46416	0.634029
One Codex	200(V3)	No	HC	25000	genus	SILVA	10608	260	14132	0.976077	0.428779	0.595821
One Codex	200(V3)	No	HC	50000	family	SILVA	22989	0	27011	1	0.45978	0.629931
One Codex	200(V3)	No	HC	50000	genus	SILVA	20975	511	28514	0.976217	0.423832	0.591053
One Codex	200(V3)	No	HC	100000	family	SILVA	46102	0	53898	1	0.46102	0.631093
One Codex	200(V3)	No	HC	100000	genus	SILVA	42176	976	56848	0.977382	0.425917	0.593293
One Codex	400(V4-V5)	No	LC	25000	family	SILVA	15681	0	9319	1	0.62724	0.770925
One Codex	400(V4-V5)	No	LC	25000	genus	SILVA	7141	0	17859	1	0.28564	0.444355
One Codex	400(V4-V5)	No	LC	50000	family	SILVA	31040	0	18960	1	0.6208	0.766041
One Codex	400(V4-V5)	No	LC	50000	genus	SILVA	14250	0	35750	1	0.285	0.44358
One Codex	400(V4-V5)	No	LC	100000	family	SILVA	62338	0	37662	1	0.62338	0.768003
One Codex	400(V4-V5)	No	LC	100000	genus	SILVA	28127	0	71873	1	0.28127	0.439049
One Codex	400(V4-V5)	No	MC	25000	family	SILVA	22270	0	2730	1	0.8908	0.942247
One Codex	400(V4-V5)	No	MC	25000	genus	SILVA	11982	0	13018	1	0.47928	0.647991
One Codex	400(V4-V5)	No	MC	50000	family	SILVA	44537	0	5463	1	0.89074	0.942213
One Codex	400(V4-V5)	No	MC	50000	genus	SILVA	24172	0	25828	1	0.48344	0.651782
One Codex	400(V4-V5)	No	MC	100000	family	SILVA	89006	0	10994	1	0.89006	0.941833
One Codex	400(V4-V5)	No	MC	100000	genus	SILVA	47907	0	52093	1	0.47907	0.647799
One Codex	400(V4-V5)	No	HC	25000	family	SILVA	11847	0	13153	1	0.47388	0.643037
One Codex	400(V4-V5)	No	HC	25000	genus	SILVA	10144	0	14856	1	0.40576	0.577282
One Codex	400(V4-V5)	No	HC	50000	family	SILVA	23417	0	26583	1	0.46834	0.637918
One Codex	400(V4-V5)	No	HC	50000	genus	SILVA	20055	0	29945	1	0.4011	0.57255
One Codex	400(V4-V5)	No	HC	100000	family	SILVA	46946	0	53054	1	0.46946	0.638956
One Codex	400(V4-V5)	No	HC	100000	genus	SILVA	39970	0	60030	1	0.3997	0.571122
One Codex	200(V3)	Yes	LC	25000	family	SILVA	14141	4590	6269	0.754952	0.692847	0.722567
One Codex	200(V3)	Yes	LC	25000	genus	SILVA	8923	9403	6674	0.486904	0.572097	0.526074
One Codex	200(V3)	Yes	LC	50000	family	SILVA	27947	9484	12569	0.746627	0.689777	0.717077
One Codex	200(V3)	Yes	LC	50000	genus	SILVA	17702	18910	13388	0.483503	0.569379	0.522939
One Codex	200(V3)	Yes	LC	100000	family	SILVA	56321	18442	25237	0.753327	0.690564	0.720581
One Codex	200(V3)	Yes	LC	100000	genus	SILVA	35170	38050	26780	0.480333	0.567716	0.520382
One Codex	200(V3)	Yes	MC	25000	family	SILVA	18489	3151	3360	0.85439	0.846217	0.850284
One Codex	200(V3)	Yes	MC	25000	genus	SILVA	15452	6087	3461	0.717396	0.817004	0.763967
One Codex	200(V3)	Yes	MC	50000	family	SILVA	36530	6596	6874	0.847053	0.841627	0.844331
One Codex	200(V3)	Yes	MC	50000	genus	SILVA	30670	12239	7091	0.714768	0.812214	0.760382
One Codex	200(V3)	Yes	MC	100000	family	SILVA	73478	13128	13394	0.848417	0.845819	0.847116
One Codex	200(V3)	Yes	MC	100000	genus	SILVA	61630	24592	13778	0.714783	0.817287	0.762606
One Codex	200(V3)	Yes	HC	25000	family	SILVA	14361	3291	7348	0.813562	0.661523	0.729707
One Codex	200(V3)	Yes	HC	25000	genus	SILVA	12364	4681	7955	0.725374	0.608495	0.661814
One Codex	200(V3)	Yes	HC	50000	family	SILVA	28567	6572	14861	0.812971	0.657801	0.727201
One Codex	200(V3)	Yes	HC	50000	genus	SILVA	24581	9350	16069	0.724441	0.604699	0.659176
One Codex	200(V3)	Yes	HC	100000	family	SILVA	57447	12843	29710	0.817286	0.659121	0.729731
One Codex	200(V3)	Yes	HC	100000	genus	SILVA	49519	18504	31977	0.727974	0.607625	0.662377
One Codex	400(V4-V5)	Yes	LC	25000	family	SILVA	18931	3335	2734	0.85022	0.873806	0.861852
One Codex	400(V4-V5)	Yes	LC	25000	genus	SILVA	10569	9335	5096	0.530999	0.674689	0.594282
One Codex	400(V4-V5)	Yes	LC	50000	family	SILVA	37656	6870	5474	0.845708	0.873081	0.859177
One Codex	400(V4-V5)	Yes	LC	50000	genus	SILVA	21182	18841	9977	0.529246	0.679804	0.59515
One Codex	400(V4-V5)	Yes	LC	100000	family	SILVA	75501	13515	10984	0.848173	0.872995	0.860405
One Codex	400(V4-V5)	Yes	LC	100000	genus	SILVA	42051	37903	20046	0.52594	0.677182	0.592055
One Codex	400(V4-V5)	Yes	MC	25000	family	SILVA	22902	1207	891	0.949936	0.962552	0.956202
One Codex	400(V4-V5)	Yes	MC	25000	genus	SILVA	16928	5462	2610	0.756052	0.866414	0.807479
One Codex	400(V4-V5)	Yes	MC	50000	family	SILVA	45815	2504	1681	0.948178	0.964608	0.956322
One Codex	400(V4-V5)	Yes	MC	50000	genus	SILVA	34016	10717	5267	0.760423	0.865922	0.809751
One Codex	400(V4-V5)	Yes	MC	100000	family	SILVA	91574	4928	3498	0.948934	0.963207	0.956017
One Codex	400(V4-V5)	Yes	MC	100000	genus	SILVA	67767	21767	10466	0.756886	0.86622	0.80787
One Codex	400(V4-V5)	Yes	HC	25000	family	SILVA	16999	4213	3788	0.801386	0.817771	0.809495
One Codex	400(V4-V5)	Yes	HC	25000	genus	SILVA	13941	6106	4953	0.695416	0.737853	0.716006
One Codex	400(V4-V5)	Yes	HC	50000	family	SILVA	33895	8574	7531	0.798112	0.818206	0.808034
One Codex	400(V4-V5)	Yes	HC	50000	genus	SILVA	27795	12345	9860	0.692451	0.738149	0.71457
One Codex	400(V4-V5)	Yes	HC	100000	family	SILVA	68033	17130	14837	0.798856	0.820961	0.809758
One Codex	400(V4-V5)	Yes	HC	100000	genus	SILVA	55483	24965	19552	0.689675	0.739428	0.713686
QIIME UCLUST	200(V3)	No	LC	25000	family	Greengenes	22334	1219	1447	0.948244	0.939153	0.943677
QIIME UCLUST	200(V3)	No	LC	25000	genus	Greengenes	10175	1587	13238	0.865074	0.434588	0.578536
QIIME UCLUST	200(V3)	No	LC	50000	family	Greengenes	44643	2459	2898	0.947794	0.939042	0.943398
QIIME UCLUST	200(V3)	No	LC	50000	genus	Greengenes	19746	3105	27149	0.86412	0.421068	0.566226
QIIME UCLUST	200(V3)	No	LC	100000	family	Greengenes	89299	4850	5851	0.948486	0.938508	0.94347
QIIME UCLUST	200(V3)	No	LC	100000	genus	Greengenes	40048	6185	53767	0.866221	0.426883	0.571918
QIIME UCLUST	200(V3)	No	MC	25000	family	Greengenes	24268	359	373	0.985423	0.984863	0.985142
QIIME UCLUST	200(V3)	No	MC	25000	genus	Greengenes	17904	551	6545	0.970144	0.7323	0.834607
QIIME UCLUST	200(V3)	No	MC	50000	family	Greengenes	48362	890	748	0.98193	0.984769	0.983347
QIIME UCLUST	200(V3)	No	MC	50000	genus	Greengenes	35890	1283	12827	0.965486	0.736704	0.83572
QIIME UCLUST	200(V3)	No	MC	100000	family	Greengenes	96758	1761	1481	0.982125	0.984925	0.983523
QIIME UCLUST	200(V3)	No	MC	100000	genus	Greengenes	71292	2273	26435	0.969102	0.729502	0.832403
QIIME UCLUST	200(V3)	No	HC	25000	family	Greengenes	20885	2026	2089	0.911571	0.909071	0.910319
QIIME UCLUST	200(V3)	No	HC	25000	genus	Greengenes	13950	3765	7285	0.787468	0.656934	0.716303
QIIME UCLUST	200(V3)	No	HC	50000	family	Greengenes	42294	3513	4193	0.923309	0.909803	0.916506
QIIME UCLUST	200(V3)	No	HC	50000	genus	Greengenes	28135	4840	17025	0.853222	0.623007	0.720164
QIIME UCLUST	200(V3)	No	HC	100000	family	Greengenes	84780	7832	7388	0.915432	0.919842	0.917632
QIIME UCLUST	200(V3)	No	HC	100000	genus	Greengenes	56181	10692	33127	0.840115	0.62907	0.719435
QIIME UCLUST	400(V4-V5)	No	LC	25000	family	Greengenes	23234	482	1284	0.979676	0.94763	0.963387
QIIME UCLUST	400(V4-V5)	No	LC	25000	genus	Greengenes	10862	9079	5059	0.544707	0.682244	0.605767
QIIME UCLUST	400(V4-V5)	No	LC	50000	family	Greengenes	46398	1039	2563	0.978097	0.947652	0.962634
QIIME UCLUST	400(V4-V5)	No	LC	50000	genus	Greengenes	22282	18226	9492	0.550064	0.701265	0.61653
QIIME UCLUST	400(V4-V5)	No	LC	100000	family	Greengenes	92838	2055	5107	0.978344	0.947858	0.96286
QIIME UCLUST	400(V4-V5)	No	LC	100000	genus	Greengenes	43712	36315	19973	0.546216	0.686378	0.608328
QIIME UCLUST	400(V4-V5)	No	MC	25000	family	Greengenes	24476	160	364	0.993505	0.985346	0.989409
QIIME UCLUST	400(V4-V5)	No	MC	25000	genus	Greengenes	8175	5428	11397	0.60097	0.417689	0.492841
QIIME UCLUST	400(V4-V5)	No	MC	50000	family	Greengenes	48992	285	723	0.994216	0.985457	0.989817
QIIME UCLUST	400(V4-V5)	No	MC	50000	genus	Greengenes	16505	10856	22639	0.603231	0.421648	0.496354
QIIME UCLUST	400(V4-V5)	No	MC	100000	family	Greengenes	97943	585	1472	0.994063	0.985193	0.989608
QIIME UCLUST	400(V4-V5)	No	MC	100000	genus	Greengenes	32682	21816	45502	0.599692	0.418014	0.492637
QIIME UCLUST	400(V4-V5)	No	HC	25000	family	Greengenes	22530	737	1733	0.968324	0.928574	0.948033
QIIME UCLUST	400(V4-V5)	No	HC	25000	genus	Greengenes	15586	2641	6773	0.855105	0.697079	0.768048
QIIME UCLUST	400(V4-V5)	No	HC	50000	family	Greengenes	45012	1489	3499	0.967979	0.927872	0.947501
QIIME UCLUST	400(V4-V5)	No	HC	50000	genus	Greengenes	30972	5286	13742	0.854211	0.692669	0.765005
QIIME UCLUST	400(V4-V5)	No	HC	100000	family	Greengenes	90020	2872	7108	0.969082	0.926818	0.947479
QIIME UCLUST	400(V4-V5)	No	HC	100000	genus	Greengenes	61145	9628	29227	0.863959	0.676592	0.758882
QIIME UCLUST	200(V3)	Yes	LC	25000	family	Greengenes	21465	1018	2517	0.954721	0.895046	0.923921
QIIME UCLUST	200(V3)	Yes	LC	25000	genus	Greengenes	9510	7038	8452	0.574692	0.529451	0.551145
QIIME UCLUST	200(V3)	Yes	LC	50000	family	Greengenes	43114	2513	4373	0.944923	0.907912	0.926048
QIIME UCLUST	200(V3)	Yes	LC	50000	genus	Greengenes	19317	9160	21523	0.678337	0.472992	0.557352
QIIME UCLUST	200(V3)	Yes	LC	100000	family	Greengenes	86435	4996	8569	0.945358	0.909804	0.92724
QIIME UCLUST	200(V3)	Yes	LC	100000	genus	Greengenes	38920	21545	39535	0.643678	0.496081	0.560322
QIIME UCLUST	200(V3)	Yes	MC	25000	family	Greengenes	23870	305	825	0.987384	0.966592	0.976877
QIIME UCLUST	200(V3)	Yes	MC	25000	genus	Greengenes	13419	2923	8658	0.821136	0.607827	0.698561
QIIME UCLUST	200(V3)	Yes	MC	50000	family	Greengenes	47958	659	1383	0.986445	0.971971	0.979154
QIIME UCLUST	200(V3)	Yes	MC	50000	genus	Greengenes	26905	5451	17644	0.83153	0.603942	0.699694
QIIME UCLUST	200(V3)	Yes	MC	100000	family	Greengenes	96003	1085	2912	0.988825	0.970561	0.979607
QIIME UCLUST	200(V3)	Yes	MC	100000	genus	Greengenes	53734	12075	34191	0.816514	0.611134	0.699052
QIIME UCLUST	200(V3)	Yes	HC	25000	family	Greengenes	19690	1462	3848	0.930881	0.83652	0.881181
QIIME UCLUST	200(V3)	Yes	HC	25000	genus	Greengenes	12729	2742	9529	0.822765	0.571884	0.674759
QIIME UCLUST	200(V3)	Yes	HC	50000	family	Greengenes	40455	2567	6978	0.940333	0.852887	0.894478
QIIME UCLUST	200(V3)	Yes	HC	50000	genus	Greengenes	27256	5399	17345	0.834665	0.611107	0.705602
QIIME UCLUST	200(V3)	Yes	HC	100000	family	Greengenes	80959	4350	14691	0.949009	0.846409	0.894777
QIIME UCLUST	200(V3)	Yes	HC	100000	genus	Greengenes	57132	13804	29064	0.805402	0.662815	0.727185
QIIME UCLUST	400(V4-V5)	Yes	LC	25000	family	Greengenes	22193	479	2328	0.978873	0.905061	0.940521
QIIME UCLUST	400(V4-V5)	Yes	LC	25000	genus	Greengenes	10374	7391	7235	0.583957	0.589131	0.586532
QIIME UCLUST	400(V4-V5)	Yes	LC	50000	family	Greengenes	44517	1137	4346	0.975095	0.911057	0.941989
QIIME UCLUST	400(V4-V5)	Yes	LC	50000	genus	Greengenes	21883	6286	21831	0.776847	0.500595	0.60885
QIIME UCLUST	400(V4-V5)	Yes	LC	100000	family	Greengenes	89375	2066	8559	0.977406	0.912604	0.943894
QIIME UCLUST	400(V4-V5)	Yes	LC	100000	genus	Greengenes	42895	22336	34769	0.657586	0.552315	0.600371
QIIME UCLUST	400(V4-V5)	Yes	MC	25000	family	Greengenes	23428	135	1437	0.994271	0.942208	0.967539
QIIME UCLUST	400(V4-V5)	Yes	MC	25000	genus	Greengenes	9487	3081	12432	0.754854	0.432821	0.550178
QIIME UCLUST	400(V4-V5)	Yes	MC	50000	family	Greengenes	47247	267	2486	0.994381	0.950013	0.971691
QIIME UCLUST	400(V4-V5)	Yes	MC	50000	genus	Greengenes	17701	8289	24010	0.68107	0.424372	0.522917
QIIME UCLUST	400(V4-V5)	Yes	MC	100000	family	Greengenes	94458	567	4975	0.994033	0.949966	0.9715
QIIME UCLUST	400(V4-V5)	Yes	MC	100000	genus	Greengenes	35820	15766	48414	0.694374	0.425244	0.527463
QIIME UCLUST	400(V4-V5)	Yes	HC	25000	family	Greengenes	21570	773	2657	0.965403	0.890329	0.926347
QIIME UCLUST	400(V4-V5)	Yes	HC	25000	genus	Greengenes	14820	1951	8229	0.883668	0.642978	0.74435
QIIME UCLUST	400(V4-V5)	Yes	HC	50000	family	Greengenes	43420	1517	5063	0.966242	0.895572	0.929565
QIIME UCLUST	400(V4-V5)	Yes	HC	50000	genus	Greengenes	30141	4476	15383	0.870699	0.66209	0.752199
QIIME UCLUST	400(V4-V5)	Yes	HC	100000	family	Greengenes	86990	3036	9974	0.966276	0.897137	0.930424
QIIME UCLUST	400(V4-V5)	Yes	HC	100000	genus	Greengenes	58578	7164	34258	0.891029	0.630984	0.738791
QIIME UCLUST	200(V3)	No	LC	25000	family	SILVA	22697	517	1786	0.977729	0.927051	0.951716
QIIME UCLUST	200(V3)	No	LC	25000	genus	SILVA	11730	820	12450	0.934661	0.485112	0.638715
QIIME UCLUST	200(V3)	No	LC	50000	family	SILVA	45337	658	4005	0.985694	0.918832	0.951089
QIIME UCLUST	200(V3)	No	LC	50000	genus	SILVA	22951	1906	25143	0.923321	0.477211	0.629217
QIIME UCLUST	200(V3)	No	LC	100000	family	SILVA	90043	2718	7239	0.970699	0.925587	0.947607
QIIME UCLUST	200(V3)	No	LC	100000	genus	SILVA	45633	3081	51286	0.936753	0.470836	0.626685
QIIME UCLUST	200(V3)	No	MC	25000	family	SILVA	24314	201	485	0.991801	0.980443	0.986089
QIIME UCLUST	200(V3)	No	MC	25000	genus	SILVA	18230	281	6489	0.98482	0.737489	0.843396
QIIME UCLUST	200(V3)	No	MC	50000	family	SILVA	48675	382	943	0.992213	0.980995	0.986572
QIIME UCLUST	200(V3)	No	MC	50000	genus	SILVA	36575	431	12994	0.988353	0.73786	0.844932
QIIME UCLUST	200(V3)	No	MC	100000	family	SILVA	97377	553	2070	0.994353	0.979185	0.986711
QIIME UCLUST	200(V3)	No	MC	100000	genus	SILVA	73372	646	25982	0.991272	0.738491	0.846411
QIIME UCLUST	200(V3)	No	HC	25000	family	SILVA	21155	727	3118	0.966776	0.871545	0.916694
QIIME UCLUST	200(V3)	No	HC	25000	genus	SILVA	16761	854	7385	0.951519	0.694152	0.802711
QIIME UCLUST	200(V3)	No	HC	50000	family	SILVA	43808	1518	4674	0.966509	0.903593	0.933993
QIIME UCLUST	200(V3)	No	HC	50000	genus	SILVA	33431	2255	14314	0.93681	0.700199	0.801405
QIIME UCLUST	200(V3)	No	HC	100000	family	SILVA	87729	3837	8434	0.958096	0.912295	0.934634
QIIME UCLUST	200(V3)	No	HC	100000	genus	SILVA	68251	11156	20593	0.859509	0.768212	0.8113
QIIME UCLUST	400(V4-V5)	No	LC	25000	family	SILVA	24276	232	492	0.990534	0.980136	0.985307
QIIME UCLUST	400(V4-V5)	No	LC	25000	genus	SILVA	13577	2119	9304	0.864997	0.593374	0.703891
QIIME UCLUST	400(V4-V5)	No	LC	50000	family	SILVA	48466	515	1019	0.989486	0.979408	0.984421
QIIME UCLUST	400(V4-V5)	No	LC	50000	genus	SILVA	27304	4258	18438	0.865091	0.596913	0.706406
QIIME UCLUST	400(V4-V5)	No	LC	100000	family	SILVA	96936	1007	2057	0.989719	0.979221	0.984442
QIIME UCLUST	400(V4-V5)	No	LC	100000	genus	SILVA	54191	8502	37307	0.864387	0.592264	0.702907
QIIME UCLUST	400(V4-V5)	No	MC	25000	family	SILVA	24768	90	142	0.996379	0.994299	0.995338
QIIME UCLUST	400(V4-V5)	No	MC	25000	genus	SILVA	18869	603	5528	0.969032	0.773415	0.860243
QIIME UCLUST	400(V4-V5)	No	MC	50000	family	SILVA	49570	136	294	0.997264	0.994104	0.995681
QIIME UCLUST	400(V4-V5)	No	MC	50000	genus	SILVA	37789	1148	11063	0.970516	0.77354	0.860905
QIIME UCLUST	400(V4-V5)	No	MC	100000	family	SILVA	99112	309	579	0.996892	0.994192	0.99554
QIIME UCLUST	400(V4-V5)	No	MC	100000	genus	SILVA	75389	2481	22130	0.968139	0.77307	0.859678
QIIME UCLUST	400(V4-V5)	No	HC	25000	family	SILVA	23906	373	721	0.984637	0.970723	0.977631
QIIME UCLUST	400(V4-V5)	No	HC	25000	genus	SILVA	19189	3245	2566	0.855353	0.88205	0.868497
QIIME UCLUST	400(V4-V5)	No	HC	50000	family	SILVA	47832	713	1455	0.985313	0.970479	0.97784
QIIME UCLUST	400(V4-V5)	No	HC	50000	genus	SILVA	38526	5937	5537	0.866473	0.874339	0.870388
QIIME UCLUST	400(V4-V5)	No	HC	100000	family	SILVA	95658	1462	2880	0.984946	0.970773	0.977808
QIIME UCLUST	400(V4-V5)	No	HC	100000	genus	SILVA	76949	12046	11005	0.864644	0.874878	0.869731
QIIME UCLUST	200(V3)	Yes	LC	25000	family	SILVA	21854	468	2678	0.979034	0.890836	0.932855
QIIME UCLUST	200(V3)	Yes	LC	25000	genus	SILVA	12620	1394	10986	0.900528	0.53461	0.67092
QIIME UCLUST	200(V3)	Yes	LC	50000	family	SILVA	40667	3688	5645	0.916853	0.878109	0.897063
QIIME UCLUST	200(V3)	Yes	LC	50000	genus	SILVA	25251	5161	19588	0.830297	0.563148	0.671114
QIIME UCLUST	200(V3)	Yes	LC	100000	family	SILVA	81778	8317	9905	0.907686	0.891965	0.899757
QIIME UCLUST	200(V3)	Yes	LC	100000	genus	SILVA	50553	12721	36726	0.798954	0.579211	0.671564
QIIME UCLUST	200(V3)	Yes	MC	25000	family	SILVA	21980	148	2872	0.993312	0.884436	0.935717
QIIME UCLUST	200(V3)	Yes	MC	25000	genus	SILVA	15227	1430	8343	0.91415	0.646033	0.757054
QIIME UCLUST	200(V3)	Yes	MC	50000	family	SILVA	43981	3383	2636	0.928574	0.943454	0.935955
QIIME UCLUST	200(V3)	Yes	MC	50000	genus	SILVA	29945	5681	14374	0.840538	0.67567	0.74914
QIIME UCLUST	200(V3)	Yes	MC	100000	family	SILVA	94901	557	4542	0.994165	0.954326	0.973838
QIIME UCLUST	200(V3)	Yes	MC	100000	genus	SILVA	67289	3671	29040	0.948267	0.698533	0.804464
QIIME UCLUST	200(V3)	Yes	HC	25000	family	SILVA	20773	887	3340	0.959049	0.861486	0.907653
QIIME UCLUST	200(V3)	Yes	HC	25000	genus	SILVA	15669	1384	7947	0.918841	0.663491	0.770562
QIIME UCLUST	200(V3)	Yes	HC	50000	family	SILVA	42526	1776	5698	0.959912	0.881843	0.919223
QIIME UCLUST	200(V3)	Yes	HC	50000	genus	SILVA	32147	5388	12465	0.856454	0.720591	0.78267
QIIME UCLUST	200(V3)	Yes	HC	100000	family	SILVA	85405	2329	12266	0.973454	0.874415	0.92128
QIIME UCLUST	200(V3)	Yes	HC	100000	genus	SILVA	65251	5485	29264	0.922458	0.690377	0.78972
QIIME UCLUST	400(V4-V5)	Yes	LC	25000	family	SILVA	22874	205	1921	0.991117	0.922525	0.955592
QIIME UCLUST	400(V4-V5)	Yes	LC	25000	genus	SILVA	12272	2062	10666	0.856146	0.535007	0.65851
QIIME UCLUST	400(V4-V5)	Yes	LC	50000	family	SILVA	46041	387	3572	0.991665	0.928003	0.958778
QIIME UCLUST	400(V4-V5)	Yes	LC	50000	genus	SILVA	25383	11797	12820	0.682706	0.664424	0.673441
QIIME UCLUST	400(V4-V5)	Yes	LC	100000	family	SILVA	92581	808	6611	0.991348	0.933351	0.961476
QIIME UCLUST	400(V4-V5)	Yes	LC	100000	genus	SILVA	51171	9612	39217	0.841864	0.566126	0.676995
QIIME UCLUST	400(V4-V5)	Yes	MC	25000	family	SILVA	23607	72	1321	0.996959	0.947007	0.971342
QIIME UCLUST	400(V4-V5)	Yes	MC	25000	genus	SILVA	17660	867	6473	0.953203	0.731778	0.827942
QIIME UCLUST	400(V4-V5)	Yes	MC	50000	family	SILVA	47544	119	2337	0.997503	0.953148	0.974822
QIIME UCLUST	400(V4-V5)	Yes	MC	50000	genus	SILVA	35050	2841	12109	0.925022	0.74323	0.824221
QIIME UCLUST	400(V4-V5)	Yes	MC	100000	family	SILVA	95468	307	4225	0.996795	0.95762	0.976815
QIIME UCLUST	400(V4-V5)	Yes	MC	100000	genus	SILVA	70654	5227	24119	0.931116	0.745508	0.828038
QIIME UCLUST	400(V4-V5)	Yes	HC	25000	family	SILVA	22545	271	2184	0.988122	0.911683	0.948365
QIIME UCLUST	400(V4-V5)	Yes	HC	25000	genus	SILVA	17803	3020	4177	0.854968	0.809964	0.831858
QIIME UCLUST	400(V4-V5)	Yes	HC	50000	family	SILVA	45536	592	3872	0.987166	0.921632	0.953274
QIIME UCLUST	400(V4-V5)	Yes	HC	50000	genus	SILVA	36016	5388	8596	0.869868	0.807316	0.837426
QIIME UCLUST	400(V4-V5)	Yes	HC	100000	family	SILVA	90878	1821	7301	0.980356	0.925636	0.95221
QIIME UCLUST	400(V4-V5)	Yes	HC	100000	genus	SILVA	70962	14006	15032	0.835161	0.825197	0.830149
QIIME SortMeRna SUMACLUST	200(V3)	No	LC	25000	family	SILVA	21960	517	2523	0.976999	0.896949	0.935264
QIIME SortMeRna SUMACLUST	200(V3)	No	LC	25000	genus	SILVA	11968	1335	11697	0.899647	0.505726	0.647479
QIIME SortMeRna SUMACLUST	200(V3)	No	LC	50000	family	SILVA	43507	1422	5071	0.96835	0.895611	0.930561
QIIME SortMeRna SUMACLUST	200(V3)	No	LC	50000	genus	SILVA	22997	2618	24385	0.897794	0.485353	0.630081
QIIME SortMeRna SUMACLUST	200(V3)	No	LC	100000	family	SILVA	87786	2685	9529	0.970322	0.902081	0.934958
QIIME SortMeRna SUMACLUST	200(V3)	No	LC	100000	genus	SILVA	47167	4541	48292	0.91218	0.494107	0.641
QIIME SortMeRna SUMACLUST	200(V3)	No	MC	25000	family	SILVA	24052	144	804	0.994049	0.967654	0.980674
QIIME SortMeRna SUMACLUST	200(V3)	No	MC	25000	genus	SILVA	18253	415	6332	0.977769	0.742445	0.844011
QIIME SortMeRna SUMACLUST	200(V3)	No	MC	50000	family	SILVA	48273	284	1443	0.994151	0.970975	0.982427
QIIME SortMeRna SUMACLUST	200(V3)	No	MC	50000	genus	SILVA	36525	641	12834	0.982753	0.739987	0.844265
QIIME SortMeRna SUMACLUST	200(V3)	No	MC	100000	family	SILVA	97203	944	1853	0.990382	0.981293	0.985817
QIIME SortMeRna SUMACLUST	200(V3)	No	MC	100000	genus	SILVA	74073	1823	24104	0.97598	0.754484	0.851057
QIIME SortMeRna SUMACLUST	200(V3)	No	HC	25000	family	SILVA	20391	727	3882	0.965574	0.840069	0.89846
QIIME SortMeRna SUMACLUST	200(V3)	No	HC	25000	genus	SILVA	16157	1780	7063	0.900764	0.695823	0.78514
QIIME SortMeRna SUMACLUST	200(V3)	No	HC	50000	family	SILVA	42188	1033	6779	0.9761	0.86156	0.91526
QIIME SortMeRna SUMACLUST	200(V3)	No	HC	50000	genus	SILVA	34481	3777	11742	0.901276	0.745971	0.816302
QIIME SortMeRna SUMACLUST	200(V3)	No	HC	100000	family	SILVA	81541	3848	14611	0.954936	0.848043	0.89832
QIIME SortMeRna SUMACLUST	200(V3)	No	HC	100000	genus	SILVA	67429	9222	23349	0.879688	0.74279	0.805464
QIIME SortMeRna SUMACLUST	400(V4-V5)	No	LC	25000	family	SILVA	23632	155	1213	0.993484	0.951177	0.97187
QIIME SortMeRna SUMACLUST	400(V4-V5)	No	LC	25000	genus	SILVA	13713	2254	9033	0.858834	0.602875	0.708444
QIIME SortMeRna SUMACLUST	400(V4-V5)	No	LC	50000	family	SILVA	47254	352	2394	0.992606	0.951781	0.971765
QIIME SortMeRna SUMACLUST	400(V4-V5)	No	LC	50000	genus	SILVA	27299	4446	18255	0.859946	0.599267	0.706322
QIIME SortMeRna SUMACLUST	400(V4-V5)	No	LC	100000	family	SILVA	94483	689	4828	0.99276	0.951385	0.971632
QIIME SortMeRna SUMACLUST	400(V4-V5)	No	LC	100000	genus	SILVA	54867	6785	38348	0.889947	0.588607	0.708569
QIIME SortMeRna SUMACLUST	400(V4-V5)	No	MC	25000	family	SILVA	24613	110	277	0.995551	0.988871	0.9922
QIIME SortMeRna SUMACLUST	400(V4-V5)	No	MC	25000	genus	SILVA	18830	528	5642	0.972724	0.769451	0.859229
QIIME SortMeRna SUMACLUST	400(V4-V5)	No	MC	50000	family	SILVA	49226	190	584	0.996155	0.988275	0.9922
QIIME SortMeRna SUMACLUST	400(V4-V5)	No	MC	50000	genus	SILVA	37789	1109	11102	0.97149	0.772923	0.860905
QIIME SortMeRna SUMACLUST	400(V4-V5)	No	MC	100000	family	SILVA	98390	417	1193	0.99578	0.98802	0.991885
QIIME SortMeRna SUMACLUST	400(V4-V5)	No	MC	100000	genus	SILVA	75176	2797	22027	0.964129	0.773392	0.858291
QIIME SortMeRna SUMACLUST	400(V4-V5)	No	HC	25000	family	SILVA	23106	485	1409	0.979441	0.942525	0.960629
QIIME SortMeRna SUMACLUST	400(V4-V5)	No	HC	25000	genus	SILVA	18951	3142	2907	0.857783	0.867005	0.862369
QIIME SortMeRna SUMACLUST	400(V4-V5)	No	HC	50000	family	SILVA	46160	964	2876	0.979543	0.941349	0.960067
QIIME SortMeRna SUMACLUST	400(V4-V5)	No	HC	50000	genus	SILVA	38038	7116	4846	0.842406	0.886997	0.864127
QIIME SortMeRna SUMACLUST	400(V4-V5)	No	HC	100000	family	SILVA	92283	1954	5763	0.979265	0.941221	0.959866
QIIME SortMeRna SUMACLUST	400(V4-V5)	No	HC	100000	genus	SILVA	75995	13466	10539	0.849476	0.87821	0.863604
QIIME SortMeRna SUMACLUST	200(V3)	Yes	LC	25000	family	SILVA	21622	523	2855	0.976383	0.88336	0.927545
QIIME SortMeRna SUMACLUST	200(V3)	Yes	LC	25000	genus	SILVA	11614	1578	11808	0.880382	0.495859	0.634402
QIIME SortMeRna SUMACLUST	200(V3)	Yes	LC	50000	family	SILVA	43542	1079	5379	0.975819	0.890047	0.930961
QIIME SortMeRna SUMACLUST	200(V3)	Yes	LC	50000	genus	SILVA	22592	4645	22763	0.82946	0.498115	0.622438
QIIME SortMeRna SUMACLUST	200(V3)	Yes	LC	100000	family	SILVA	85847	3676	10477	0.958938	0.891232	0.923846
QIIME SortMeRna SUMACLUST	200(V3)	Yes	LC	100000	genus	SILVA	46010	10674	43316	0.811693	0.51508	0.630231
QIIME SortMeRna SUMACLUST	200(V3)	Yes	MC	25000	family	SILVA	23715	218	1067	0.990891	0.956945	0.973622
QIIME SortMeRna SUMACLUST	200(V3)	Yes	MC	25000	genus	SILVA	14756	4269	5975	0.775611	0.711784	0.742328
QIIME SortMeRna SUMACLUST	200(V3)	Yes	MC	50000	family	SILVA	47743	441	1816	0.990848	0.963357	0.976909
QIIME SortMeRna SUMACLUST	200(V3)	Yes	MC	50000	genus	SILVA	36989	1119	11892	0.970636	0.756715	0.850429
QIIME SortMeRna SUMACLUST	200(V3)	Yes	MC	100000	family	SILVA	95924	368	3708	0.996178	0.962783	0.979196
QIIME SortMeRna SUMACLUST	200(V3)	Yes	MC	100000	genus	SILVA	73079	17595	9326	0.805953	0.886827	0.844458
QIIME SortMeRna SUMACLUST	200(V3)	Yes	HC	25000	family	SILVA	20247	956	3797	0.954912	0.842081	0.894954
QIIME SortMeRna SUMACLUST	200(V3)	Yes	HC	25000	genus	SILVA	16488	2063	6449	0.888793	0.718839	0.794832
QIIME SortMeRna SUMACLUST	200(V3)	Yes	HC	50000	family	SILVA	39727	1289	8984	0.968573	0.815565	0.885508
QIIME SortMeRna SUMACLUST	200(V3)	Yes	HC	50000	genus	SILVA	32620	4459	12921	0.879743	0.716278	0.789639
QIIME SortMeRna SUMACLUST	200(V3)	Yes	HC	100000	family	SILVA	82491	2252	15257	0.973426	0.843915	0.904056
QIIME SortMeRna SUMACLUST	200(V3)	Yes	HC	100000	genus	SILVA	65169	11290	23541	0.852339	0.73463	0.789119
QIIME SortMeRna SUMACLUST	400(V4-V5)	Yes	LC	25000	family	SILVA	22893	180	1927	0.992199	0.922361	0.956006
QIIME SortMeRna SUMACLUST	400(V4-V5)	Yes	LC	25000	genus	SILVA	20213	2255	2532	0.899635	0.888679	0.894123
QIIME SortMeRna SUMACLUST	400(V4-V5)	Yes	LC	50000	family	SILVA	46339	359	3302	0.992312	0.933482	0.961999
QIIME SortMeRna SUMACLUST	400(V4-V5)	Yes	LC	50000	genus	SILVA	26035	5363	18602	0.829193	0.583261	0.684816
QIIME SortMeRna SUMACLUST	400(V4-V5)	Yes	LC	100000	family	SILVA	92478	1346	6176	0.985654	0.937397	0.96092
QIIME SortMeRna SUMACLUST	400(V4-V5)	Yes	LC	100000	genus	SILVA	53659	8057	38284	0.86945	0.583612	0.698417
QIIME SortMeRna SUMACLUST	400(V4-V5)	Yes	MC	25000	family	SILVA	24159	59	782	0.997564	0.968646	0.982892
QIIME SortMeRna SUMACLUST	400(V4-V5)	Yes	MC	25000	genus	SILVA	18719	556	5725	0.971154	0.765791	0.856332
QIIME SortMeRna SUMACLUST	400(V4-V5)	Yes	MC	50000	family	SILVA	48628	90	1282	0.998153	0.974314	0.986089
QIIME SortMeRna SUMACLUST	400(V4-V5)	Yes	MC	50000	genus	SILVA	34033	13019	2948	0.723306	0.920283	0.809991
QIIME SortMeRna SUMACLUST	400(V4-V5)	Yes	MC	100000	family	SILVA	97397	233	2370	0.997613	0.976245	0.986813
QIIME SortMeRna SUMACLUST	400(V4-V5)	Yes	MC	100000	genus	SILVA	74126	3073	22801	0.960194	0.764761	0.851406
QIIME SortMeRna SUMACLUST	400(V4-V5)	Yes	HC	25000	family	SILVA	22031	279	2690	0.987494	0.891186	0.936871
QIIME SortMeRna SUMACLUST	400(V4-V5)	Yes	HC	25000	genus	SILVA	18185	3119	3696	0.853596	0.831086	0.842191
QIIME SortMeRna SUMACLUST	400(V4-V5)	Yes	HC	50000	family	SILVA	44793	486	4721	0.989267	0.904653	0.94507
QIIME SortMeRna SUMACLUST	400(V4-V5)	Yes	HC	50000	genus	SILVA	37715	4660	7625	0.890029	0.831826	0.859944
QIIME SortMeRna SUMACLUST	400(V4-V5)	Yes	HC	100000	family	SILVA	90329	979	8692	0.989278	0.912221	0.949188
QIIME SortMeRna SUMACLUST	400(V4-V5)	Yes	HC	100000	genus	SILVA	71561	13602	14837	0.840283	0.828271	0.834234
QIIME SortMeRna SUMACLUST	200(V3)	No	LC	25000	family	Greengenes	22170	1305	1525	0.944409	0.93564	0.940004
QIIME SortMeRna SUMACLUST	200(V3)	No	LC	25000	genus	Greengenes	9648	1834	13518	0.840272	0.416472	0.556915
QIIME SortMeRna SUMACLUST	200(V3)	No	LC	50000	family	Greengenes	44638	2670	2692	0.943561	0.943123	0.943342
QIIME SortMeRna SUMACLUST	200(V3)	No	LC	50000	genus	Greengenes	19743	4699	25558	0.807749	0.435818	0.566164
QIIME SortMeRna SUMACLUST	200(V3)	No	LC	100000	family	Greengenes	90018	5133	4849	0.946054	0.948886	0.947468
QIIME SortMeRna SUMACLUST	200(V3)	No	LC	100000	genus	Greengenes	39509	6468	54023	0.859321	0.422412	0.566401
QIIME SortMeRna SUMACLUST	200(V3)	No	MC	25000	family	Greengenes	24259	333	408	0.986459	0.98346	0.984957
QIIME SortMeRna SUMACLUST	200(V3)	No	MC	25000	genus	Greengenes	17890	577	6533	0.968755	0.732506	0.834227
QIIME SortMeRna SUMACLUST	200(V3)	No	MC	50000	family	Greengenes	48359	845	796	0.982827	0.983806	0.983316
QIIME SortMeRna SUMACLUST	200(V3)	No	MC	50000	genus	Greengenes	35768	1550	12682	0.958465	0.738246	0.834064
QIIME SortMeRna SUMACLUST	200(V3)	No	MC	100000	family	Greengenes	97140	1476	1384	0.985033	0.985953	0.985493
QIIME SortMeRna SUMACLUST	200(V3)	No	MC	100000	genus	Greengenes	71268	2630	26102	0.96441	0.73193	0.83224
QIIME SortMeRna SUMACLUST	200(V3)	No	HC	25000	family	Greengenes	21147	1904	1949	0.917401	0.915613	0.916506
QIIME SortMeRna SUMACLUST	200(V3)	No	HC	25000	genus	Greengenes	13677	3527	7796	0.79499	0.636939	0.707242
QIIME SortMeRna SUMACLUST	200(V3)	No	HC	50000	family	Greengenes	42336	3738	3926	0.91887	0.915136	0.916999
QIIME SortMeRna SUMACLUST	200(V3)	No	HC	50000	genus	Greengenes	28585	5543	15872	0.837582	0.642981	0.727493
QIIME SortMeRna SUMACLUST	200(V3)	No	HC	100000	family	Greengenes	85790	6369	7841	0.930891	0.916256	0.923516
QIIME SortMeRna SUMACLUST	200(V3)	No	HC	100000	genus	Greengenes	56138	12286	31576	0.820443	0.640012	0.719082
QIIME SortMeRna SUMACLUST	400(V4-V5)	No	LC	25000	family	Greengenes	22986	482	1532	0.979461	0.937515	0.958029
QIIME SortMeRna SUMACLUST	400(V4-V5)	No	LC	25000	genus	Greengenes	11116	9575	4309	0.537238	0.720648	0.615572
QIIME SortMeRna SUMACLUST	400(V4-V5)	No	LC	50000	family	Greengenes	45870	1039	3091	0.977851	0.936868	0.956921
QIIME SortMeRna SUMACLUST	400(V4-V5)	No	LC	50000	genus	Greengenes	21922	18234	9844	0.545921	0.690109	0.609605
QIIME SortMeRna SUMACLUST	400(V4-V5)	No	LC	100000	family	Greengenes	91778	2055	6167	0.978099	0.937036	0.957128
QIIME SortMeRna SUMACLUST	400(V4-V5)	No	LC	100000	genus	Greengenes	43364	36971	19665	0.53979	0.688001	0.60495
QIIME SortMeRna SUMACLUST	400(V4-V5)	No	MC	25000	family	Greengenes	24557	160	283	0.993527	0.988607	0.991061
QIIME SortMeRna SUMACLUST	400(V4-V5)	No	MC	25000	genus	Greengenes	8200	5465	11335	0.600073	0.419759	0.493976
QIIME SortMeRna SUMACLUST	400(V4-V5)	No	MC	50000	family	Greengenes	48856	285	859	0.9942	0.982722	0.988428
QIIME SortMeRna SUMACLUST	400(V4-V5)	No	MC	50000	genus	Greengenes	16555	10950	22495	0.601891	0.423944	0.497483
QIIME SortMeRna SUMACLUST	400(V4-V5)	No	MC	100000	family	Greengenes	98236	585	1179	0.99408	0.988141	0.991102
QIIME SortMeRna SUMACLUST	400(V4-V5)	No	MC	100000	genus	Greengenes	32568	22217	45215	0.594469	0.418703	0.49134
QIIME SortMeRna SUMACLUST	400(V4-V5)	No	HC	25000	family	Greengenes	22855	737	1408	0.968761	0.941969	0.955177
QIIME SortMeRna SUMACLUST	400(V4-V5)	No	HC	25000	genus	Greengenes	15326	2619	7055	0.854054	0.684777	0.760105
QIIME SortMeRna SUMACLUST	400(V4-V5)	No	HC	50000	family	Greengenes	45694	1489	2817	0.968442	0.941931	0.955002
QIIME SortMeRna SUMACLUST	400(V4-V5)	No	HC	50000	genus	Greengenes	30490	5767	13743	0.840941	0.689304	0.75761
QIIME SortMeRna SUMACLUST	400(V4-V5)	No	HC	100000	family	Greengenes	91402	2872	5726	0.969536	0.941047	0.955079
QIIME SortMeRna SUMACLUST	400(V4-V5)	No	HC	100000	genus	Greengenes	60623	10569	28808	0.851542	0.677875	0.754848
QIIME SortMeRna SUMACLUST	200(V3)	Yes	LC	25000	family	Greengenes	15046	1323	8631	0.919176	0.635469	0.751436
QIIME SortMeRna SUMACLUST	200(V3)	Yes	LC	25000	genus	Greengenes	9623	2750	12627	0.777742	0.432494	0.555873
QIIME SortMeRna SUMACLUST	200(V3)	Yes	LC	50000	family	Greengenes	44183	1697	4120	0.963012	0.914705	0.938237
QIIME SortMeRna SUMACLUST	200(V3)	Yes	LC	50000	genus	Greengenes	20027	3660	26313	0.845485	0.432175	0.571979
QIIME SortMeRna SUMACLUST	200(V3)	Yes	LC	100000	family	Greengenes	85280	6955	7765	0.924595	0.916546	0.920553
QIIME SortMeRna SUMACLUST	200(V3)	Yes	LC	100000	genus	Greengenes	40970	37697	21333	0.520803	0.657593	0.581258
QIIME SortMeRna SUMACLUST	200(V3)	Yes	MC	25000	family	Greengenes	23938	289	773	0.988071	0.968718	0.978299
QIIME SortMeRna SUMACLUST	200(V3)	Yes	MC	25000	genus	Greengenes	13321	5608	6071	0.703735	0.686933	0.695232
QIIME SortMeRna SUMACLUST	200(V3)	Yes	MC	50000	family	Greengenes	47978	539	1483	0.98889	0.970017	0.979363
QIIME SortMeRna SUMACLUST	200(V3)	Yes	MC	50000	genus	Greengenes	26521	10957	12522	0.707642	0.679277	0.693169
QIIME SortMeRna SUMACLUST	200(V3)	Yes	MC	100000	family	Greengenes	96281	1077	2642	0.988938	0.973292	0.981053
QIIME SortMeRna SUMACLUST	200(V3)	Yes	MC	100000	genus	Greengenes	51356	22396	26248	0.696334	0.66177	0.678612
QIIME SortMeRna SUMACLUST	200(V3)	Yes	HC	25000	family	Greengenes	20316	1614	3070	0.926402	0.868725	0.896637
QIIME SortMeRna SUMACLUST	200(V3)	Yes	HC	25000	genus	Greengenes	14302	2559	8139	0.84823	0.637316	0.7278
QIIME SortMeRna SUMACLUST	200(V3)	Yes	HC	50000	family	Greengenes	41200	2891	5909	0.934431	0.874567	0.903509
QIIME SortMeRna SUMACLUST	200(V3)	Yes	HC	50000	genus	Greengenes	26830	5459	17711	0.830933	0.602366	0.698425
QIIME SortMeRna SUMACLUST	200(V3)	Yes	HC	100000	family	Greengenes	80886	7714	11400	0.912935	0.876471	0.894331
QIIME SortMeRna SUMACLUST	200(V3)	Yes	HC	100000	genus	Greengenes	53885	13425	32690	0.80055	0.622408	0.700328
QIIME SortMeRna SUMACLUST	400(V4-V5)	Yes	LC	25000	family	Greengenes	22867	482	1651	0.979357	0.932662	0.955439
QIIME SortMeRna SUMACLUST	400(V4-V5)	Yes	LC	25000	genus	Greengenes	10877	7053	7070	0.606637	0.606062	0.606349
QIIME SortMeRna SUMACLUST	400(V4-V5)	Yes	LC	50000	family	Greengenes	46207	854	2939	0.981853	0.940199	0.960575
QIIME SortMeRna SUMACLUST	400(V4-V5)	Yes	LC	50000	genus	Greengenes	22079	2313	25608	0.905174	0.462998	0.612633
QIIME SortMeRna SUMACLUST	400(V4-V5)	Yes	LC	100000	family	Greengenes	91895	2284	5821	0.975748	0.940429	0.957763
QIIME SortMeRna SUMACLUST	400(V4-V5)	Yes	LC	100000	genus	Greengenes	44646	11880	43474	0.789831	0.50665	0.617314
QIIME SortMeRna SUMACLUST	400(V4-V5)	Yes	MC	25000	family	Greengenes	24175	149	676	0.993874	0.972798	0.983223
QIIME SortMeRna SUMACLUST	400(V4-V5)	Yes	MC	25000	genus	Greengenes	9019	3182	12799	0.739202	0.413374	0.530233
QIIME SortMeRna SUMACLUST	400(V4-V5)	Yes	MC	50000	family	Greengenes	48467	278	1255	0.994297	0.97476	0.984431
QIIME SortMeRna SUMACLUST	400(V4-V5)	Yes	MC	50000	genus	Greengenes	16290	2423	31287	0.870518	0.342392	0.491477
QIIME SortMeRna SUMACLUST	400(V4-V5)	Yes	MC	100000	family	Greengenes	97170	561	2269	0.99426	0.977182	0.985647
QIIME SortMeRna SUMACLUST	400(V4-V5)	Yes	MC	100000	genus	Greengenes	36261	19661	44078	0.648421	0.45135	0.532229
QIIME SortMeRna SUMACLUST	400(V4-V5)	Yes	HC	25000	family	Greengenes	22055	882	2063	0.961547	0.914462	0.937414
QIIME SortMeRna SUMACLUST	400(V4-V5)	Yes	HC	25000	genus	Greengenes	14913	2349	7738	0.863921	0.658382	0.747275
QIIME SortMeRna SUMACLUST	400(V4-V5)	Yes	HC	50000	family	Greengenes	44573	1516	3911	0.967107	0.919334	0.942616
QIIME SortMeRna SUMACLUST	400(V4-V5)	Yes	HC	50000	genus	Greengenes	30913	4418	14669	0.874954	0.678184	0.764105
QIIME SortMeRna SUMACLUST	400(V4-V5)	Yes	HC	100000	family	Greengenes	89433	2876	7691	0.968844	0.920813	0.944218
QIIME SortMeRna SUMACLUST	400(V4-V5)	Yes	HC	100000	genus	Greengenes	62554	8838	28608	0.876205	0.686185	0.76964
CLARK	200(V3)	No	LC	25000	family	RefSeq Bacteria	15308	175	9517	0.988697	0.616636	0.759551
CLARK	200(V3)	No	LC	25000	genus	RefSeq Bacteria	14807	676	9517	0.956339	0.60874	0.74394
CLARK	200(V3)	No	LC	50000	family	RefSeq Bacteria	30573	341	19086	0.988969	0.615659	0.758889
CLARK	200(V3)	No	LC	50000	genus	RefSeq Bacteria	29518	1396	19086	0.954842	0.607316	0.742423
CLARK	200(V3)	No	LC	100000	family	RefSeq Bacteria	60751	703	38546	0.988561	0.611811	0.75584
CLARK	200(V3)	No	LC	100000	genus	RefSeq Bacteria	58675	2779	38546	0.954779	0.603522	0.739562
CLARK	200(V3)	No	MC	25000	family	RefSeq Bacteria	14507	45	10448	0.996908	0.581326	0.734401
CLARK	200(V3)	No	MC	25000	genus	RefSeq Bacteria	14360	192	10448	0.986806	0.578846	0.729675
CLARK	200(V3)	No	MC	50000	family	RefSeq Bacteria	28848	103	21049	0.996442	0.578151	0.731737
CLARK	200(V3)	No	MC	50000	genus	RefSeq Bacteria	28528	423	21049	0.985389	0.575428	0.726569
CLARK	200(V3)	No	MC	100000	family	RefSeq Bacteria	57633	186	42181	0.996783	0.577404	0.73123
CLARK	200(V3)	No	MC	100000	genus	RefSeq Bacteria	57023	796	42181	0.986233	0.574805	0.726301
CLARK	200(V3)	No	HC	25000	family	RefSeq Bacteria	21747	234	3019	0.989354	0.878099	0.930413
CLARK	200(V3)	No	HC	25000	genus	RefSeq Bacteria	21052	929	3019	0.957736	0.874579	0.914271
CLARK	200(V3)	No	HC	50000	family	RefSeq Bacteria	43190	467	6343	0.989303	0.871944	0.926923
CLARK	200(V3)	No	HC	50000	genus	RefSeq Bacteria	41752	1905	6343	0.956364	0.868115	0.910106
CLARK	200(V3)	No	HC	100000	family	RefSeq Bacteria	86851	965	12184	0.989011	0.876973	0.929628
CLARK	200(V3)	No	HC	100000	genus	RefSeq Bacteria	83877	3939	12184	0.955145	0.873164	0.912316
CLARK	400(V4-V5)	No	LC	25000	family	RefSeq Bacteria	24315	0	685	1	0.9726	0.98611
CLARK	400(V4-V5)	No	LC	25000	genus	RefSeq Bacteria	23653	662	685	0.972774	0.971855	0.972314
CLARK	400(V4-V5)	No	LC	50000	family	RefSeq Bacteria	48649	0	1351	1	0.97298	0.986305
CLARK	400(V4-V5)	No	LC	50000	genus	RefSeq Bacteria	47280	1369	1351	0.97186	0.972219	0.972039
CLARK	400(V4-V5)	No	LC	100000	family	RefSeq Bacteria	97185	0	2815	1	0.97185	0.985724
CLARK	400(V4-V5)	No	LC	100000	genus	RefSeq Bacteria	94481	2704	2815	0.972177	0.971068	0.971622
CLARK	400(V4-V5)	No	MC	25000	family	RefSeq Bacteria	24781	0	219	1	0.99124	0.995601
CLARK	400(V4-V5)	No	MC	25000	genus	RefSeq Bacteria	24602	179	219	0.992777	0.991177	0.991976
CLARK	400(V4-V5)	No	MC	50000	family	RefSeq Bacteria	49617	0	383	1	0.99234	0.996155
CLARK	400(V4-V5)	No	MC	50000	genus	RefSeq Bacteria	49215	402	383	0.991898	0.992278	0.992088
CLARK	400(V4-V5)	No	MC	100000	family	RefSeq Bacteria	99212	0	788	1	0.99212	0.996044
CLARK	400(V4-V5)	No	MC	100000	genus	RefSeq Bacteria	98413	799	788	0.991947	0.992057	0.992002
CLARK	400(V4-V5)	No	HC	25000	family	RefSeq Bacteria	24011	0	989	1	0.96044	0.979821
CLARK	400(V4-V5)	No	HC	25000	genus	RefSeq Bacteria	23007	1004	989	0.958186	0.958785	0.958485
CLARK	400(V4-V5)	No	HC	50000	family	RefSeq Bacteria	48107	0	1893	1	0.96214	0.980705
CLARK	400(V4-V5)	No	HC	50000	genus	RefSeq Bacteria	46198	1909	1893	0.960318	0.960637	0.960477
CLARK	400(V4-V5)	No	HC	100000	family	RefSeq Bacteria	96165	0	3835	1	0.96165	0.98045
CLARK	400(V4-V5)	No	HC	100000	genus	RefSeq Bacteria	92247	3918	3835	0.959258	0.960086	0.959672
CLARK	200(V3)	Yes	LC	25000	family	RefSeq Bacteria	14494	1412	9094	0.911228	0.614465	0.733985
CLARK	200(V3)	Yes	LC	25000	genus	RefSeq Bacteria	14082	1812	9106	0.885995	0.607297	0.720639
CLARK	200(V3)	Yes	LC	50000	family	RefSeq Bacteria	28848	2881	18271	0.9092	0.612237	0.731737
CLARK	200(V3)	Yes	LC	50000	genus	RefSeq Bacteria	28029	3685	18286	0.883805	0.605182	0.718425
CLARK	200(V3)	Yes	LC	100000	family	RefSeq Bacteria	57365	5827	36808	0.907789	0.609145	0.729069
CLARK	200(V3)	Yes	LC	100000	genus	RefSeq Bacteria	55760	7414	36826	0.882642	0.602251	0.715973
CLARK	200(V3)	Yes	MC	25000	family	RefSeq Bacteria	11303	3117	10580	0.783842	0.51652	0.622703
CLARK	200(V3)	Yes	MC	25000	genus	RefSeq Bacteria	11177	3234	10589	0.775588	0.513507	0.617906
CLARK	200(V3)	Yes	MC	50000	family	RefSeq Bacteria	22477	6124	21399	0.785882	0.512285	0.620252
CLARK	200(V3)	Yes	MC	50000	genus	RefSeq Bacteria	22204	6390	21406	0.776527	0.509149	0.615035
CLARK	200(V3)	Yes	MC	100000	family	RefSeq Bacteria	44780	12371	42849	0.783538	0.511018	0.618594
CLARK	200(V3)	Yes	MC	100000	genus	RefSeq Bacteria	44250	12893	42857	0.774373	0.507996	0.613518
CLARK	200(V3)	Yes	HC	25000	family	RefSeq Bacteria	20355	1524	3121	0.930344	0.867056	0.897586
CLARK	200(V3)	Yes	HC	25000	genus	RefSeq Bacteria	19800	2061	3139	0.905723	0.863159	0.883929
CLARK	200(V3)	Yes	HC	50000	family	RefSeq Bacteria	40545	3009	6446	0.930913	0.862825	0.895577
CLARK	200(V3)	Yes	HC	50000	genus	RefSeq Bacteria	39387	4155	6458	0.904575	0.859134	0.881269
CLARK	200(V3)	Yes	HC	100000	family	RefSeq Bacteria	81603	6062	12335	0.93085	0.86869	0.898697
CLARK	200(V3)	Yes	HC	100000	genus	RefSeq Bacteria	79335	8313	12352	0.905155	0.865281	0.884769
CLARK	400(V4-V5)	Yes	LC	25000	family	RefSeq Bacteria	24083	441	476	0.982018	0.980618	0.981317
CLARK	400(V4-V5)	Yes	LC	25000	genus	RefSeq Bacteria	23378	1126	496	0.954048	0.979224	0.966472
CLARK	400(V4-V5)	Yes	LC	50000	family	RefSeq Bacteria	48150	878	972	0.982092	0.980213	0.981151
CLARK	400(V4-V5)	Yes	LC	50000	genus	RefSeq Bacteria	46713	2282	1005	0.953424	0.978939	0.966013
CLARK	400(V4-V5)	Yes	LC	100000	family	RefSeq Bacteria	96178	1902	1920	0.980608	0.980428	0.980518
CLARK	400(V4-V5)	Yes	LC	100000	genus	RefSeq Bacteria	93307	4746	1947	0.951598	0.97956	0.965376
CLARK	400(V4-V5)	Yes	MC	25000	family	RefSeq Bacteria	24625	206	169	0.991704	0.993184	0.992443
CLARK	400(V4-V5)	Yes	MC	25000	genus	RefSeq Bacteria	24445	371	184	0.98505	0.992529	0.988775
CLARK	400(V4-V5)	Yes	MC	50000	family	RefSeq Bacteria	49343	376	281	0.992437	0.994337	0.993387
CLARK	400(V4-V5)	Yes	MC	50000	genus	RefSeq Bacteria	48915	787	298	0.984166	0.993945	0.989031
CLARK	400(V4-V5)	Yes	MC	100000	family	RefSeq Bacteria	98621	754	625	0.992413	0.993703	0.993057
CLARK	400(V4-V5)	Yes	MC	100000	genus	RefSeq Bacteria	97763	1594	643	0.983957	0.993466	0.988688
CLARK	400(V4-V5)	Yes	HC	25000	family	RefSeq Bacteria	23755	549	696	0.977411	0.971535	0.974464
CLARK	400(V4-V5)	Yes	HC	25000	genus	RefSeq Bacteria	22677	1611	712	0.933671	0.969558	0.951276
CLARK	400(V4-V5)	Yes	HC	50000	family	RefSeq Bacteria	47593	1117	1290	0.977068	0.97361	0.975336
CLARK	400(V4-V5)	Yes	HC	50000	genus	RefSeq Bacteria	45577	3107	1316	0.93618	0.971936	0.953723
CLARK	400(V4-V5)	Yes	HC	100000	family	RefSeq Bacteria	95165	2242	2593	0.976983	0.973475	0.975226
CLARK	400(V4-V5)	Yes	HC	100000	genus	RefSeq Bacteria	90961	6422	2617	0.934054	0.972034	0.952666

## Sheet: Clustering indices
Pipeline	Amplicon	Error simulation	Complexity	Throughput	Rank	Bank	NMI	AMI	NID
BMP	200(V3)	No	LC	25000	family	Greengenes	0.944288	0.94357	0.923034
BMP	200(V3)	No	LC	25000	genus	Greengenes	0.747919	0.761656	0.609387
BMP	200(V3)	No	LC	50000	family	Greengenes	0.938306	0.938178	0.91213
BMP	200(V3)	No	LC	50000	genus	Greengenes	0.749276	0.766266	0.610693
BMP	200(V3)	No	LC	100000	family	Greengenes	0.942001	0.942152	0.916014
BMP	200(V3)	No	LC	100000	genus	Greengenes	0.747546	0.76637	0.608542
BMP	200(V3)	No	MC	25000	family	Greengenes	0.967057	0.966656	0.948043
BMP	200(V3)	No	MC	25000	genus	Greengenes	0.731937	0.752324	0.581767
BMP	200(V3)	No	MC	50000	family	Greengenes	0.967039	0.966894	0.947355
BMP	200(V3)	No	MC	50000	genus	Greengenes	0.733967	0.756081	0.583955
BMP	200(V3)	No	MC	100000	family	Greengenes	0.963575	0.963635	0.941118
BMP	200(V3)	No	MC	100000	genus	Greengenes	0.730666	0.754588	0.580048
BMP	200(V3)	No	HC	25000	family	Greengenes	0.938453	0.937911	0.914794
BMP	200(V3)	No	HC	25000	genus	Greengenes	0.783281	0.793377	0.658601
BMP	200(V3)	No	HC	50000	family	Greengenes	0.930535	0.930645	0.899102
BMP	200(V3)	No	HC	50000	genus	Greengenes	0.782459	0.794932	0.657467
BMP	200(V3)	No	HC	100000	family	Greengenes	0.928046	0.928441	0.89526
BMP	200(V3)	No	HC	100000	genus	Greengenes	0.781941	0.795737	0.656169
BMP	400(V4-V5)	No	LC	25000	family	Greengenes	0.96058	0.960193	0.935934
BMP	400(V4-V5)	No	LC	25000	genus	Greengenes	0.806692	0.815498	0.683678
BMP	400(V4-V5)	No	LC	50000	family	Greengenes	0.961802	0.961895	0.934232
BMP	400(V4-V5)	No	LC	50000	genus	Greengenes	0.810235	0.821079	0.68859
BMP	400(V4-V5)	No	LC	100000	family	Greengenes	0.955617	0.9559	0.926646
BMP	400(V4-V5)	No	LC	100000	genus	Greengenes	0.814969	0.826739	0.693692
BMP	400(V4-V5)	No	MC	25000	family	Greengenes	0.980334	0.980056	0.966948
BMP	400(V4-V5)	No	MC	25000	genus	Greengenes	0.663899	0.687564	0.513354
BMP	400(V4-V5)	No	MC	50000	family	Greengenes	0.980359	0.980245	0.965803
BMP	400(V4-V5)	No	MC	50000	genus	Greengenes	0.716649	0.735117	0.576691
BMP	400(V4-V5)	No	MC	100000	family	Greengenes	0.98024	0.980233	0.96514
BMP	400(V4-V5)	No	MC	100000	genus	Greengenes	0.707252	0.728361	0.565517
BMP	400(V4-V5)	No	HC	25000	family	Greengenes	0.957539	0.957338	0.929924
BMP	400(V4-V5)	No	HC	25000	genus	Greengenes	0.790066	0.801204	0.661943
BMP	400(V4-V5)	No	HC	50000	family	Greengenes	0.955195	0.955408	0.924612
BMP	400(V4-V5)	No	HC	50000	genus	Greengenes	0.788584	0.802873	0.657517
BMP	400(V4-V5)	No	HC	100000	family	Greengenes	0.95113	0.951487	0.920601
BMP	400(V4-V5)	No	HC	100000	genus	Greengenes	0.790929	0.805739	0.661047
BMP	200(V3)	Yes	LC	25000	family	Greengenes	0.916551	0.915432	0.887695
BMP	200(V3)	Yes	LC	25000	genus	Greengenes	0.7288	0.73218	0.622763
BMP	200(V3)	Yes	LC	50000	family	Greengenes	0.918491	0.918187	0.890254
BMP	200(V3)	Yes	LC	50000	genus	Greengenes	0.729007	0.735551	0.625248
BMP	200(V3)	Yes	LC	100000	family	Greengenes	0.90178	0.901445	0.88741
BMP	200(V3)	Yes	LC	100000	genus	Greengenes	0.719629	0.726689	0.622246
BMP	200(V3)	Yes	MC	25000	family	Greengenes	0.946278	0.945284	0.941493
BMP	200(V3)	Yes	MC	25000	genus	Greengenes	0.75608	0.756981	0.673146
BMP	200(V3)	Yes	MC	50000	family	Greengenes	0.95914	0.958837	0.941685
BMP	200(V3)	Yes	MC	50000	genus	Greengenes	0.754319	0.759605	0.656951
BMP	200(V3)	Yes	MC	100000	family	Greengenes	0.956256	0.956166	0.937545
BMP	200(V3)	Yes	MC	100000	genus	Greengenes	0.756154	0.76282	0.658387
BMP	200(V3)	Yes	HC	25000	family	Greengenes	0.901326	0.90045	0.86589
BMP	200(V3)	Yes	HC	25000	genus	Greengenes	0.746967	0.756722	0.622181
BMP	200(V3)	Yes	HC	50000	family	Greengenes	0.904552	0.904475	0.870196
BMP	200(V3)	Yes	HC	50000	genus	Greengenes	0.743959	0.756821	0.618506
BMP	200(V3)	Yes	HC	100000	family	Greengenes	0.902876	0.903228	0.867073
BMP	200(V3)	Yes	HC	100000	genus	Greengenes	0.746819	0.759749	0.625263
BMP	400(V4-V5)	Yes	LC	25000	family	Greengenes	0.88576	0.88577	0.827355
BMP	400(V4-V5)	Yes	LC	25000	genus	Greengenes	0.683383	0.693536	0.553026
BMP	400(V4-V5)	Yes	LC	50000	family	Greengenes	0.893033	0.89393	0.838684
BMP	400(V4-V5)	Yes	LC	50000	genus	Greengenes	0.682471	0.695962	0.556182
BMP	400(V4-V5)	Yes	LC	100000	family	Greengenes	0.88928	0.890548	0.836425
BMP	400(V4-V5)	Yes	LC	100000	genus	Greengenes	0.69097	0.705496	0.567646
BMP	400(V4-V5)	Yes	MC	25000	family	Greengenes	0.900785	0.900183	0.855824
BMP	400(V4-V5)	Yes	MC	25000	genus	Greengenes	0.587388	0.60357	0.45565
BMP	400(V4-V5)	Yes	MC	50000	family	Greengenes	0.88525	0.88538	0.837413
BMP	400(V4-V5)	Yes	MC	50000	genus	Greengenes	0.548278	0.572753	0.413338
BMP	400(V4-V5)	Yes	MC	100000	family	Greengenes	0.881741	0.882194	0.837385
BMP	400(V4-V5)	Yes	MC	100000	genus	Greengenes	0.558649	0.582232	0.428157
BMP	400(V4-V5)	Yes	HC	25000	family	Greengenes	0.894469	0.894656	0.840156
BMP	400(V4-V5)	Yes	HC	25000	genus	Greengenes	0.744751	0.753901	0.619849
BMP	400(V4-V5)	Yes	HC	50000	family	Greengenes	0.90019	0.901168	0.847526
BMP	400(V4-V5)	Yes	HC	50000	genus	Greengenes	0.744662	0.758564	0.615516
BMP	400(V4-V5)	Yes	HC	100000	family	Greengenes	0.904115	0.905248	0.85506
BMP	400(V4-V5)	Yes	HC	100000	genus	Greengenes	0.749682	0.763584	0.624788
BMP	200(V3)	No	LC	25000	family	SILVA	0.91712	0.917408	0.864474
BMP	200(V3)	No	LC	25000	genus	SILVA	0.770179	0.78222	0.635505
BMP	200(V3)	No	LC	50000	family	SILVA	0.915842	0.91691	0.86251
BMP	200(V3)	No	LC	50000	genus	SILVA	0.764776	0.780856	0.627623
BMP	200(V3)	No	LC	100000	family	SILVA	0.922193	0.923348	0.873126
BMP	200(V3)	No	LC	100000	genus	SILVA	0.768946	0.786077	0.63274
BMP	200(V3)	No	MC	25000	family	SILVA	0.951679	0.951548	0.916546
BMP	200(V3)	No	MC	25000	genus	SILVA	0.740289	0.75967	0.591551
BMP	200(V3)	No	MC	50000	family	SILVA	0.951479	0.951662	0.916587
BMP	200(V3)	No	MC	50000	genus	SILVA	0.740807	0.76213	0.591901
BMP	200(V3)	No	MC	100000	family	SILVA	0.953988	0.954302	0.921594
BMP	200(V3)	No	MC	100000	genus	SILVA	0.743781	0.765812	0.595931
BMP	200(V3)	No	HC	25000	family	SILVA	0.915409	0.915919	0.86344
BMP	200(V3)	No	HC	25000	genus	SILVA	0.80868	0.817111	0.689838
BMP	200(V3)	No	HC	50000	family	SILVA	0.913258	0.914253	0.862627
BMP	200(V3)	No	HC	50000	genus	SILVA	0.824731	0.831919	0.719841
BMP	200(V3)	No	HC	100000	family	SILVA	0.909435	0.911173	0.852663
BMP	200(V3)	No	HC	100000	genus	SILVA	0.821479	0.830794	0.71096
BMP	400(V4-V5)	No	LC	25000	family	SILVA	0.97416	0.973851	0.956228
BMP	400(V4-V5)	No	LC	25000	genus	SILVA	0.857936	0.859849	0.765759
BMP	400(V4-V5)	No	LC	50000	family	SILVA	0.967548	0.967617	0.942183
BMP	400(V4-V5)	No	LC	50000	genus	SILVA	0.850758	0.855912	0.752811
BMP	400(V4-V5)	No	LC	100000	family	SILVA	0.964721	0.964969	0.937852
BMP	400(V4-V5)	No	LC	100000	genus	SILVA	0.850691	0.856829	0.753433
BMP	400(V4-V5)	No	MC	25000	family	SILVA	0.984869	0.984655	0.972747
BMP	400(V4-V5)	No	MC	25000	genus	SILVA	0.861929	0.863023	0.783984
BMP	400(V4-V5)	No	MC	50000	family	SILVA	0.983172	0.983068	0.969864
BMP	400(V4-V5)	No	MC	50000	genus	SILVA	0.823382	0.828296	0.725413
BMP	400(V4-V5)	No	MC	100000	family	SILVA	0.982521	0.982517	0.96805
BMP	400(V4-V5)	No	MC	100000	genus	SILVA	0.821337	0.827556	0.722223
BMP	400(V4-V5)	No	HC	25000	family	SILVA	0.965384	0.965199	0.940681
BMP	400(V4-V5)	No	HC	25000	genus	SILVA	0.896176	0.896908	0.826382
BMP	400(V4-V5)	No	HC	50000	family	SILVA	0.960986	0.961177	0.93196
BMP	400(V4-V5)	No	HC	50000	genus	SILVA	0.892988	0.895358	0.819982
BMP	400(V4-V5)	No	HC	100000	family	SILVA	0.961661	0.961977	0.933177
BMP	400(V4-V5)	No	HC	100000	genus	SILVA	0.892642	0.895469	0.82104
BMP	200(V3)	Yes	LC	25000	family	SILVA	0.898667	0.897701	0.857759
BMP	200(V3)	Yes	LC	25000	genus	SILVA	0.751659	0.751622	0.659742
BMP	200(V3)	Yes	LC	50000	family	SILVA	0.893313	0.893487	0.849269
BMP	200(V3)	Yes	LC	50000	genus	SILVA	0.749185	0.753111	0.654865
BMP	200(V3)	Yes	LC	100000	family	SILVA	0.891721	0.892449	0.846554
BMP	200(V3)	Yes	LC	100000	genus	SILVA	0.758292	0.763744	0.665261
BMP	200(V3)	Yes	MC	25000	family	SILVA	0.941499	0.940866	0.913697
BMP	200(V3)	Yes	MC	25000	genus	SILVA	0.778361	0.779499	0.693154
BMP	200(V3)	Yes	MC	50000	family	SILVA	0.941373	0.941168	0.913379
BMP	200(V3)	Yes	MC	50000	genus	SILVA	0.771641	0.773064	0.696629
BMP	200(V3)	Yes	MC	100000	family	SILVA	0.942013	0.942017	0.916202
BMP	200(V3)	Yes	MC	100000	genus	SILVA	0.791281	0.793858	0.716927
BMP	200(V3)	Yes	HC	25000	family	SILVA	0.891979	0.89184	0.840483
BMP	200(V3)	Yes	HC	25000	genus	SILVA	0.795328	0.799826	0.687599
BMP	200(V3)	Yes	HC	50000	family	SILVA	0.895368	0.89619	0.844158
BMP	200(V3)	Yes	HC	50000	genus	SILVA	0.795343	0.802008	0.689324
BMP	200(V3)	Yes	HC	100000	family	SILVA	0.890703	0.891971	0.838525
BMP	200(V3)	Yes	HC	100000	genus	SILVA	0.790598	0.799158	0.682087
BMP	400(V4-V5)	Yes	LC	25000	family	SILVA	0.886599	0.886378	0.829917
BMP	400(V4-V5)	Yes	LC	25000	genus	SILVA	0.765861	0.766443	0.664422
BMP	400(V4-V5)	Yes	LC	50000	family	SILVA	0.888171	0.889038	0.833182
BMP	400(V4-V5)	Yes	LC	50000	genus	SILVA	0.769979	0.773444	0.67464
BMP	400(V4-V5)	Yes	LC	100000	family	SILVA	0.886398	0.887754	0.831999
BMP	400(V4-V5)	Yes	LC	100000	genus	SILVA	0.773283	0.778029	0.68288
BMP	400(V4-V5)	Yes	MC	25000	family	SILVA	0.897555	0.896959	0.851139
BMP	400(V4-V5)	Yes	MC	25000	genus	SILVA	0.789785	0.787862	0.724587
BMP	400(V4-V5)	Yes	MC	50000	family	SILVA	0.883595	0.883651	0.835917
BMP	400(V4-V5)	Yes	MC	50000	genus	SILVA	0.763884	0.766464	0.675959
BMP	400(V4-V5)	Yes	MC	100000	family	SILVA	0.879145	0.879657	0.833285
BMP	400(V4-V5)	Yes	MC	100000	genus	SILVA	0.762595	0.767091	0.672272
BMP	400(V4-V5)	Yes	HC	25000	family	SILVA	0.894995	0.895109	0.841668
BMP	400(V4-V5)	Yes	HC	25000	genus	SILVA	0.83573	0.835416	0.756914
BMP	400(V4-V5)	Yes	HC	50000	family	SILVA	0.896185	0.89712	0.843345
BMP	400(V4-V5)	Yes	HC	50000	genus	SILVA	0.836313	0.838475	0.757037
BMP	400(V4-V5)	Yes	HC	100000	family	SILVA	0.902612	0.903717	0.853788
BMP	400(V4-V5)	Yes	HC	100000	genus	SILVA	0.842848	0.845594	0.76861
kraken	200(V3)	No	LC	25000	family	MiniKraken DB	0.930872	0.931545	0.876107
kraken	200(V3)	No	LC	25000	genus	MiniKraken DB	0.840403	0.845709	0.730157
kraken	200(V3)	No	LC	50000	family	MiniKraken DB	0.931424	0.932677	0.877027
kraken	200(V3)	No	LC	50000	genus	MiniKraken DB	0.837958	0.845828	0.726592
kraken	200(V3)	No	LC	100000	family	MiniKraken DB	0.930489	0.932087	0.875178
kraken	200(V3)	No	LC	100000	genus	MiniKraken DB	0.837895	0.846948	0.726307
kraken	200(V3)	No	MC	25000	family	MiniKraken DB	0.960454	0.960426	0.926437
kraken	200(V3)	No	MC	25000	genus	MiniKraken DB	0.782217	0.795744	0.644435
kraken	200(V3)	No	MC	50000	family	MiniKraken DB	0.960856	0.961088	0.927129
kraken	200(V3)	No	MC	50000	genus	MiniKraken DB	0.78066	0.796244	0.64217
kraken	200(V3)	No	MC	100000	family	MiniKraken DB	0.961823	0.962208	0.92883
kraken	200(V3)	No	MC	100000	genus	MiniKraken DB	0.781391	0.798164	0.643167
kraken	200(V3)	No	HC	25000	family	MiniKraken DB	0.923935	0.925091	0.864786
kraken	200(V3)	No	HC	25000	genus	MiniKraken DB	0.880389	0.883204	0.79304
kraken	200(V3)	No	HC	50000	family	MiniKraken DB	0.924211	0.925886	0.865166
kraken	200(V3)	No	HC	50000	genus	MiniKraken DB	0.877659	0.882018	0.788946
kraken	200(V3)	No	HC	100000	family	MiniKraken DB	0.924056	0.925989	0.864864
kraken	200(V3)	No	HC	100000	genus	MiniKraken DB	0.879149	0.884039	0.791175
kraken	400(V4-V5)	No	LC	25000	family	MiniKraken DB	0.977623	0.977451	0.956239
kraken	400(V4-V5)	No	LC	25000	genus	MiniKraken DB	0.968407	0.967881	0.940066
kraken	400(V4-V5)	No	LC	50000	family	MiniKraken DB	0.977743	0.977789	0.956462
kraken	400(V4-V5)	No	LC	50000	genus	MiniKraken DB	0.968536	0.968516	0.94036
kraken	400(V4-V5)	No	LC	100000	family	MiniKraken DB	0.977643	0.977792	0.956266
kraken	400(V4-V5)	No	LC	100000	genus	MiniKraken DB	0.967751	0.967988	0.938855
kraken	400(V4-V5)	No	MC	25000	family	MiniKraken DB	0.987081	0.986915	0.974512
kraken	400(V4-V5)	No	MC	25000	genus	MiniKraken DB	0.983739	0.983474	0.968494
kraken	400(V4-V5)	No	MC	50000	family	MiniKraken DB	0.987561	0.987491	0.975438
kraken	400(V4-V5)	No	MC	50000	genus	MiniKraken DB	0.984633	0.984503	0.970269
kraken	400(V4-V5)	No	MC	100000	family	MiniKraken DB	0.986747	0.986746	0.973846
kraken	400(V4-V5)	No	MC	100000	genus	MiniKraken DB	0.984221	0.984189	0.96949
kraken	400(V4-V5)	No	HC	25000	family	MiniKraken DB	0.97657	0.97649	0.954224
kraken	400(V4-V5)	No	HC	25000	genus	MiniKraken DB	0.964364	0.964039	0.932871
kraken	400(V4-V5)	No	HC	50000	family	MiniKraken DB	0.976375	0.976479	0.953846
kraken	400(V4-V5)	No	HC	50000	genus	MiniKraken DB	0.965928	0.966041	0.935662
kraken	400(V4-V5)	No	HC	100000	family	MiniKraken DB	0.976185	0.976378	0.95348
kraken	400(V4-V5)	No	HC	100000	genus	MiniKraken DB	0.965028	0.965366	0.933977
kraken	200(V3)	Yes	LC	25000	family	MiniKraken DB	0.832161	0.834883	0.745573
kraken	200(V3)	Yes	LC	25000	genus	MiniKraken DB	0.749804	0.760706	0.616126
kraken	200(V3)	Yes	LC	50000	family	MiniKraken DB	0.828201	0.832491	0.740836
kraken	200(V3)	Yes	LC	50000	genus	MiniKraken DB	0.741497	0.756945	0.605831
kraken	200(V3)	Yes	LC	100000	family	MiniKraken DB	0.827501	0.832579	0.73981
kraken	200(V3)	Yes	LC	100000	genus	MiniKraken DB	0.743661	0.760597	0.608831
kraken	200(V3)	Yes	MC	25000	family	MiniKraken DB	0.89314	0.892691	0.846341
kraken	200(V3)	Yes	MC	25000	genus	MiniKraken DB	0.72073	0.736341	0.580432
kraken	200(V3)	Yes	MC	50000	family	MiniKraken DB	0.894283	0.89443	0.849284
kraken	200(V3)	Yes	MC	50000	genus	MiniKraken DB	0.718765	0.736523	0.578805
kraken	200(V3)	Yes	MC	100000	family	MiniKraken DB	0.894539	0.895149	0.849765
kraken	200(V3)	Yes	MC	100000	genus	MiniKraken DB	0.719009	0.738258	0.579376
kraken	200(V3)	Yes	HC	25000	family	MiniKraken DB	0.8186	0.82406	0.718252
kraken	200(V3)	Yes	HC	25000	genus	MiniKraken DB	0.772277	0.781118	0.649085
kraken	200(V3)	Yes	HC	50000	family	MiniKraken DB	0.817902	0.824602	0.717965
kraken	200(V3)	Yes	HC	50000	genus	MiniKraken DB	0.771664	0.783237	0.648387
kraken	200(V3)	Yes	HC	100000	family	MiniKraken DB	0.818667	0.82595	0.718964
kraken	200(V3)	Yes	HC	100000	genus	MiniKraken DB	0.773106	0.785688	0.650636
kraken	400(V4-V5)	Yes	LC	25000	family	MiniKraken DB	0.94991	0.949662	0.91461
kraken	400(V4-V5)	Yes	LC	25000	genus	MiniKraken DB	0.919112	0.917875	0.871731
kraken	400(V4-V5)	Yes	LC	50000	family	MiniKraken DB	0.951584	0.95177	0.918043
kraken	400(V4-V5)	Yes	LC	50000	genus	MiniKraken DB	0.921181	0.921183	0.875637
kraken	400(V4-V5)	Yes	LC	100000	family	MiniKraken DB	0.951162	0.951575	0.917564
kraken	400(V4-V5)	Yes	LC	100000	genus	MiniKraken DB	0.920531	0.921151	0.875002
kraken	400(V4-V5)	Yes	MC	25000	family	MiniKraken DB	0.972068	0.971783	0.950634
kraken	400(V4-V5)	Yes	MC	25000	genus	MiniKraken DB	0.943084	0.94228	0.912106
kraken	400(V4-V5)	Yes	MC	50000	family	MiniKraken DB	0.970441	0.970363	0.948171
kraken	400(V4-V5)	Yes	MC	50000	genus	MiniKraken DB	0.940575	0.940207	0.909399
kraken	400(V4-V5)	Yes	MC	100000	family	MiniKraken DB	0.969448	0.969522	0.946708
kraken	400(V4-V5)	Yes	MC	100000	genus	MiniKraken DB	0.941932	0.941905	0.911533
kraken	400(V4-V5)	Yes	HC	25000	family	MiniKraken DB	0.94865	0.948541	0.913926
kraken	400(V4-V5)	Yes	HC	25000	genus	MiniKraken DB	0.926186	0.925629	0.87812
kraken	400(V4-V5)	Yes	HC	50000	family	MiniKraken DB	0.949002	0.949283	0.914686
kraken	400(V4-V5)	Yes	HC	50000	genus	MiniKraken DB	0.927657	0.927995	0.881406
kraken	400(V4-V5)	Yes	HC	100000	family	MiniKraken DB	0.949562	0.950021	0.915543
kraken	400(V4-V5)	Yes	HC	100000	genus	MiniKraken DB	0.926732	0.927567	0.879602
mothur	200(V3)	No	LC	25000	family	SILVA	0.874203	0.877421	0.789501
mothur	200(V3)	No	LC	25000	genus	SILVA	0.751554	0.767325	0.6087
mothur	200(V3)	No	LC	50000	family	SILVA	0.875945	0.880039	0.791973
mothur	200(V3)	No	LC	50000	genus	SILVA	0.76082	0.778303	0.620611
mothur	200(V3)	No	LC	100000	family	SILVA	0.875301	0.87993	0.790699
mothur	200(V3)	No	LC	100000	genus	SILVA	0.751201	0.771745	0.607712
mothur	200(V3)	No	MC	25000	family	SILVA	0.932074	0.932725	0.878934
mothur	200(V3)	No	MC	25000	genus	SILVA	0.745721	0.764801	0.597026
mothur	200(V3)	No	MC	50000	family	SILVA	0.930914	0.932079	0.876389
mothur	200(V3)	No	MC	50000	genus	SILVA	0.736168	0.758636	0.585089
mothur	200(V3)	No	MC	100000	family	SILVA	0.930874	0.932329	0.876257
mothur	200(V3)	No	MC	100000	genus	SILVA	0.738413	0.762479	0.586632
mothur	200(V3)	No	HC	25000	family	SILVA	0.858132	0.863013	0.764118
mothur	200(V3)	No	HC	25000	genus	SILVA	0.8002	0.810985	0.673837
mothur	200(V3)	No	HC	50000	family	SILVA	0.85935	0.865851	0.760882
mothur	200(V3)	No	HC	50000	genus	SILVA	0.784471	0.80069	0.647905
mothur	200(V3)	No	HC	100000	family	SILVA	0.863271	0.868762	0.773492
mothur	200(V3)	No	HC	100000	genus	SILVA	0.798985	0.812063	0.67464
mothur	400(V4-V5)	No	LC	25000	family	SILVA	0.891539	0.894365	0.810394
mothur	400(V4-V5)	No	LC	25000	genus	SILVA	0.799415	0.810278	0.667599
mothur	400(V4-V5)	No	LC	50000	family	SILVA	0.892986	0.896563	0.812908
mothur	400(V4-V5)	No	LC	50000	genus	SILVA	0.786669	0.802064	0.650189
mothur	400(V4-V5)	No	LC	100000	family	SILVA	0.893295	0.897265	0.81332
mothur	400(V4-V5)	No	LC	100000	genus	SILVA	0.80225	0.816705	0.671662
mothur	400(V4-V5)	No	MC	25000	family	SILVA	0.942768	0.943206	0.89494
mothur	400(V4-V5)	No	MC	25000	genus	SILVA	0.758807	0.776563	0.612169
mothur	400(V4-V5)	No	MC	50000	family	SILVA	0.941499	0.942362	0.892458
mothur	400(V4-V5)	No	MC	50000	genus	SILVA	0.755064	0.77528	0.607192
mothur	400(V4-V5)	No	MC	100000	family	SILVA	0.9413	0.942408	0.89225
mothur	400(V4-V5)	No	MC	100000	genus	SILVA	0.757886	0.77888	0.610914
mothur	400(V4-V5)	No	HC	25000	family	SILVA	0.882258	0.885975	0.796321
mothur	400(V4-V5)	No	HC	25000	genus	SILVA	0.840425	0.847588	0.727241
mothur	400(V4-V5)	No	HC	50000	family	SILVA	0.882856	0.887243	0.797591
mothur	400(V4-V5)	No	HC	50000	genus	SILVA	0.834772	0.8443	0.718877
mothur	400(V4-V5)	No	HC	100000	family	SILVA	0.881671	0.886531	0.795577
mothur	400(V4-V5)	No	HC	100000	genus	SILVA	0.832626	0.843222	0.715638
mothur	200(V3)	Yes	LC	25000	family	SILVA	0.807791	0.814386	0.700419
mothur	200(V3)	Yes	LC	25000	genus	SILVA	0.643085	0.675561	0.479847
mothur	200(V3)	Yes	LC	50000	family	SILVA	0.811134	0.819155	0.704363
mothur	200(V3)	Yes	LC	50000	genus	SILVA	0.646898	0.684566	0.481892
mothur	200(V3)	Yes	LC	100000	family	SILVA	0.813718	0.822435	0.707066
mothur	200(V3)	Yes	LC	100000	genus	SILVA	0.655307	0.692122	0.493046
mothur	200(V3)	Yes	MC	25000	family	SILVA	0.873599	0.874593	0.807205
mothur	200(V3)	Yes	MC	25000	genus	SILVA	0.672199	0.700543	0.513817
mothur	200(V3)	Yes	MC	50000	family	SILVA	0.874369	0.876111	0.808294
mothur	200(V3)	Yes	MC	50000	genus	SILVA	0.676139	0.705724	0.518536
mothur	200(V3)	Yes	MC	100000	family	SILVA	0.87397	0.876209	0.808138
mothur	200(V3)	Yes	MC	100000	genus	SILVA	0.672367	0.704589	0.513612
mothur	200(V3)	Yes	HC	25000	family	SILVA	0.764043	0.776126	0.63817
mothur	200(V3)	Yes	HC	25000	genus	SILVA	0.649045	0.681515	0.487323
mothur	200(V3)	Yes	HC	50000	family	SILVA	0.768446	0.781263	0.645444
mothur	200(V3)	Yes	HC	50000	genus	SILVA	0.662512	0.694796	0.504303
mothur	200(V3)	Yes	HC	100000	family	SILVA	0.774211	0.787346	0.652344
mothur	200(V3)	Yes	HC	100000	genus	SILVA	0.669119	0.703171	0.509452
mothur	400(V4-V5)	Yes	LC	25000	family	SILVA	0.85588	0.858096	0.773857
mothur	400(V4-V5)	Yes	LC	25000	genus	SILVA	0.685466	0.701349	0.541725
mothur	400(V4-V5)	Yes	LC	50000	family	SILVA	0.857378	0.860771	0.776918
mothur	400(V4-V5)	Yes	LC	50000	genus	SILVA	0.691673	0.711904	0.548574
mothur	400(V4-V5)	Yes	LC	100000	family	SILVA	0.857229	0.861423	0.775557
mothur	400(V4-V5)	Yes	LC	100000	genus	SILVA	0.688027	0.711927	0.542534
mothur	400(V4-V5)	Yes	MC	25000	family	SILVA	0.890402	0.890537	0.833721
mothur	400(V4-V5)	Yes	MC	25000	genus	SILVA	0.672775	0.695418	0.522394
mothur	400(V4-V5)	Yes	MC	50000	family	SILVA	0.89079	0.891625	0.834587
mothur	400(V4-V5)	Yes	MC	50000	genus	SILVA	0.675417	0.700482	0.524529
mothur	400(V4-V5)	Yes	MC	100000	family	SILVA	0.891353	0.892661	0.835617
mothur	400(V4-V5)	Yes	MC	100000	genus	SILVA	0.676286	0.703335	0.52503
mothur	400(V4-V5)	Yes	HC	25000	family	SILVA	0.862295	0.864988	0.780956
mothur	400(V4-V5)	Yes	HC	25000	genus	SILVA	0.745802	0.756835	0.615673
mothur	400(V4-V5)	Yes	HC	50000	family	SILVA	0.85787	0.861699	0.775875
mothur	400(V4-V5)	Yes	HC	50000	genus	SILVA	0.744532	0.758562	0.615144
mothur	400(V4-V5)	Yes	HC	100000	family	SILVA	0.860924	0.865148	0.779759
mothur	400(V4-V5)	Yes	HC	100000	genus	SILVA	0.743138	0.759427	0.611782
mothur	200(V3)	No	LC	25000	family	Greengenes	0.933337	0.933102	0.894861
mothur	200(V3)	No	LC	25000	genus	Greengenes	0.870628	0.872937	0.783745
mothur	200(V3)	No	LC	50000	family	Greengenes	0.937518	0.937816	0.900357
mothur	200(V3)	No	LC	50000	genus	Greengenes	0.864825	0.869674	0.771736
mothur	200(V3)	No	LC	100000	family	Greengenes	0.931888	0.932666	0.890069
mothur	200(V3)	No	LC	100000	genus	Greengenes	0.852832	0.859755	0.752545
mothur	200(V3)	No	MC	25000	family	Greengenes	0.961247	0.960991	0.933577
mothur	200(V3)	No	MC	25000	genus	Greengenes	0.871059	0.87518	0.775539
mothur	200(V3)	No	MC	50000	family	Greengenes	0.954862	0.955053	0.920934
mothur	200(V3)	No	MC	50000	genus	Greengenes	0.861777	0.867766	0.76094
mothur	200(V3)	No	MC	100000	family	Greengenes	0.958017	0.958294	0.927479
mothur	200(V3)	No	MC	100000	genus	Greengenes	0.872542	0.878117	0.777859
mothur	200(V3)	No	HC	25000	family	Greengenes	0.92537	0.925516	0.881849
mothur	200(V3)	No	HC	25000	genus	Greengenes	0.858374	0.862568	0.76257
mothur	200(V3)	No	HC	50000	family	Greengenes	0.923294	0.923959	0.879409
mothur	200(V3)	No	HC	50000	genus	Greengenes	0.838199	0.845797	0.731838
mothur	200(V3)	No	HC	100000	family	Greengenes	0.933056	0.933701	0.894721
mothur	200(V3)	No	HC	100000	genus	Greengenes	0.886607	0.890344	0.807787
mothur	400(V4-V5)	No	LC	25000	family	Greengenes	0.937286	0.937625	0.888668
mothur	400(V4-V5)	No	LC	25000	genus	Greengenes	0.905686	0.906998	0.829796
mothur	400(V4-V5)	No	LC	50000	family	Greengenes	0.937181	0.938085	0.888462
mothur	400(V4-V5)	No	LC	50000	genus	Greengenes	0.904319	0.907016	0.827682
mothur	400(V4-V5)	No	LC	100000	family	Greengenes	0.938875	0.939956	0.891648
mothur	400(V4-V5)	No	LC	100000	genus	Greengenes	0.90712	0.91025	0.832339
mothur	400(V4-V5)	No	MC	25000	family	Greengenes	0.964758	0.964627	0.935275
mothur	400(V4-V5)	No	MC	25000	genus	Greengenes	0.888752	0.89178	0.800846
mothur	400(V4-V5)	No	MC	50000	family	Greengenes	0.964299	0.964424	0.934241
mothur	400(V4-V5)	No	MC	50000	genus	Greengenes	0.889125	0.892988	0.801286
mothur	400(V4-V5)	No	MC	100000	family	Greengenes	0.965727	0.965976	0.936983
mothur	400(V4-V5)	No	MC	100000	genus	Greengenes	0.886621	0.891302	0.797319
mothur	400(V4-V5)	No	HC	25000	family	Greengenes	0.929615	0.930392	0.876437
mothur	400(V4-V5)	No	HC	25000	genus	Greengenes	0.908521	0.910103	0.835215
mothur	400(V4-V5)	No	HC	50000	family	Greengenes	0.931815	0.932966	0.880328
mothur	400(V4-V5)	No	HC	50000	genus	Greengenes	0.904628	0.907492	0.828718
mothur	400(V4-V5)	No	HC	100000	family	Greengenes	0.930914	0.932339	0.878713
mothur	400(V4-V5)	No	HC	100000	genus	Greengenes	0.9033	0.906764	0.826413
mothur	200(V3)	Yes	LC	25000	family	Greengenes	0.828059	0.830246	0.744999
mothur	200(V3)	Yes	LC	25000	genus	Greengenes	0.647808	0.673076	0.493483
mothur	200(V3)	Yes	LC	50000	family	Greengenes	0.820804	0.825494	0.731696
mothur	200(V3)	Yes	LC	50000	genus	Greengenes	0.645851	0.676501	0.490494
mothur	200(V3)	Yes	LC	100000	family	Greengenes	0.828402	0.833382	0.742048
mothur	200(V3)	Yes	LC	100000	genus	Greengenes	0.642543	0.676265	0.486459
mothur	200(V3)	Yes	MC	25000	family	Greengenes	0.88706	0.886674	0.83773
mothur	200(V3)	Yes	MC	25000	genus	Greengenes	0.674723	0.700458	0.520145
mothur	200(V3)	Yes	MC	50000	family	Greengenes	0.884758	0.885351	0.832576
mothur	200(V3)	Yes	MC	50000	genus	Greengenes	0.678946	0.705966	0.525323
mothur	200(V3)	Yes	MC	100000	family	Greengenes	0.884873	0.885831	0.834427
mothur	200(V3)	Yes	MC	100000	genus	Greengenes	0.675998	0.70538	0.521493
mothur	200(V3)	Yes	HC	25000	family	Greengenes	0.772551	0.781312	0.658662
mothur	200(V3)	Yes	HC	25000	genus	Greengenes	0.662012	0.685459	0.5121
mothur	200(V3)	Yes	HC	50000	family	Greengenes	0.78094	0.789931	0.672087
mothur	200(V3)	Yes	HC	50000	genus	Greengenes	0.661538	0.687605	0.513144
mothur	200(V3)	Yes	HC	100000	family	Greengenes	0.782044	0.791662	0.673559
mothur	200(V3)	Yes	HC	100000	genus	Greengenes	0.664778	0.692544	0.516104
mothur	400(V4-V5)	Yes	LC	25000	family	Greengenes	0.920157	0.919663	0.878595
mothur	400(V4-V5)	Yes	LC	25000	genus	Greengenes	0.799059	0.799786	0.706473
mothur	400(V4-V5)	Yes	LC	50000	family	Greengenes	0.92089	0.921166	0.880002
mothur	400(V4-V5)	Yes	LC	50000	genus	Greengenes	0.805359	0.808936	0.714765
mothur	400(V4-V5)	Yes	LC	100000	family	Greengenes	0.922337	0.922949	0.882277
mothur	400(V4-V5)	Yes	LC	100000	genus	Greengenes	0.803347	0.808537	0.712342
mothur	400(V4-V5)	Yes	MC	25000	family	Greengenes	0.92947	0.928604	0.900522
mothur	400(V4-V5)	Yes	MC	25000	genus	Greengenes	0.754902	0.759523	0.648443
mothur	400(V4-V5)	Yes	MC	50000	family	Greengenes	0.92806	0.927717	0.898489
mothur	400(V4-V5)	Yes	MC	50000	genus	Greengenes	0.753229	0.760346	0.644706
mothur	400(V4-V5)	Yes	MC	100000	family	Greengenes	0.929083	0.929078	0.900422
mothur	400(V4-V5)	Yes	MC	100000	genus	Greengenes	0.754669	0.763114	0.646737
mothur	400(V4-V5)	Yes	HC	25000	family	Greengenes	0.930912	0.930683	0.893398
mothur	400(V4-V5)	Yes	HC	25000	genus	Greengenes	0.842612	0.845013	0.750832
mothur	400(V4-V5)	Yes	HC	50000	family	Greengenes	0.927345	0.927706	0.888412
mothur	400(V4-V5)	Yes	HC	50000	genus	Greengenes	0.838688	0.84332	0.745786
mothur	400(V4-V5)	Yes	HC	100000	family	Greengenes	0.92866	0.929275	0.890153
mothur	400(V4-V5)	Yes	HC	100000	genus	Greengenes	0.843314	0.84861	0.752401
One Codex	200(V3)	No	LC	25000	family	RefSeq 65	0.959012	0.959027	0.923312
One Codex	200(V3)	No	LC	25000	genus	RefSeq 65	0.887807	0.890106	0.798848
One Codex	200(V3)	No	LC	50000	family	RefSeq 65	0.958987	0.959372	0.923231
One Codex	200(V3)	No	LC	50000	genus	RefSeq 65	0.886228	0.890379	0.796169
One Codex	200(V3)	No	LC	100000	family	RefSeq 65	0.957726	0.958322	0.921012
One Codex	200(V3)	No	LC	100000	genus	RefSeq 65	0.885639	0.890672	0.795234
One Codex	200(V3)	No	MC	25000	family	RefSeq 65	0.976685	0.976511	0.955409
One Codex	200(V3)	No	MC	25000	genus	RefSeq 65	0.811618	0.821805	0.683161
One Codex	200(V3)	No	MC	50000	family	RefSeq 65	0.975285	0.975289	0.952877
One Codex	200(V3)	No	MC	50000	genus	RefSeq 65	0.808447	0.820671	0.678676
One Codex	200(V3)	No	MC	100000	family	RefSeq 65	0.976803	0.976903	0.955603
One Codex	200(V3)	No	MC	100000	genus	RefSeq 65	0.809422	0.822727	0.680001
One Codex	200(V3)	No	HC	25000	family	RefSeq 65	0.954914	0.955156	0.916098
One Codex	200(V3)	No	HC	25000	genus	RefSeq 65	0.928941	0.929645	0.867962
One Codex	200(V3)	No	HC	50000	family	RefSeq 65	0.954198	0.954779	0.914879
One Codex	200(V3)	No	HC	50000	genus	RefSeq 65	0.926238	0.927927	0.863296
One Codex	200(V3)	No	HC	100000	family	RefSeq 65	0.954244	0.954979	0.91493
One Codex	200(V3)	No	HC	100000	genus	RefSeq 65	0.927988	0.92998	0.866294
One Codex	400(V4-V5)	No	LC	25000	family	RefSeq 65	0.97998	0.979739	0.963784
One Codex	400(V4-V5)	No	LC	25000	genus	RefSeq 65	0.979034	0.978602	0.958929
One Codex	400(V4-V5)	No	LC	50000	family	RefSeq 65	0.980292	0.98025	0.964307
One Codex	400(V4-V5)	No	LC	50000	genus	RefSeq 65	0.979353	0.979261	0.959542
One Codex	400(V4-V5)	No	LC	100000	family	RefSeq 65	0.980094	0.980145	0.96393
One Codex	400(V4-V5)	No	LC	100000	genus	RefSeq 65	0.978543	0.978619	0.957987
One Codex	400(V4-V5)	No	MC	25000	family	RefSeq 65	0.98892	0.988751	0.979354
One Codex	400(V4-V5)	No	MC	25000	genus	RefSeq 65	0.988447	0.988233	0.977158
One Codex	400(V4-V5)	No	MC	50000	family	RefSeq 65	0.989434	0.98935	0.980429
One Codex	400(V4-V5)	No	MC	50000	genus	RefSeq 65	0.989746	0.989636	0.979699
One Codex	400(V4-V5)	No	MC	100000	family	RefSeq 65	0.988624	0.988596	0.97891
One Codex	400(V4-V5)	No	MC	100000	genus	RefSeq 65	0.989478	0.989434	0.979175
One Codex	400(V4-V5)	No	HC	25000	family	RefSeq 65	0.979133	0.978965	0.96242
One Codex	400(V4-V5)	No	HC	25000	genus	RefSeq 65	0.97657	0.976258	0.954212
One Codex	400(V4-V5)	No	HC	50000	family	RefSeq 65	0.979015	0.97901	0.962329
One Codex	400(V4-V5)	No	HC	50000	genus	RefSeq 65	0.977344	0.977331	0.955692
One Codex	400(V4-V5)	No	HC	100000	family	RefSeq 65	0.978921	0.978993	0.962234
One Codex	400(V4-V5)	No	HC	100000	genus	RefSeq 65	0.977118	0.977245	0.95526
One Codex	200(V3)	Yes	LC	25000	family	RefSeq 65	0.939153	0.93859	0.908074
One Codex	200(V3)	Yes	LC	25000	genus	RefSeq 65	0.869014	0.870603	0.779897
One Codex	200(V3)	Yes	LC	50000	family	RefSeq 65	0.938206	0.93817	0.907587
One Codex	200(V3)	Yes	LC	50000	genus	RefSeq 65	0.866816	0.87056	0.776947
One Codex	200(V3)	Yes	LC	100000	family	RefSeq 65	0.936275	0.93653	0.904989
One Codex	200(V3)	Yes	LC	100000	genus	RefSeq 65	0.865959	0.870701	0.776236
One Codex	200(V3)	Yes	MC	25000	family	RefSeq 65	0.959634	0.959008	0.944389
One Codex	200(V3)	Yes	MC	25000	genus	RefSeq 65	0.802551	0.811605	0.677327
One Codex	200(V3)	Yes	MC	50000	family	RefSeq 65	0.958078	0.957728	0.942561
One Codex	200(V3)	Yes	MC	50000	genus	RefSeq 65	0.800857	0.811985	0.674565
One Codex	200(V3)	Yes	MC	100000	family	RefSeq 65	0.960097	0.959959	0.945068
One Codex	200(V3)	Yes	MC	100000	genus	RefSeq 65	0.801933	0.814297	0.675806
One Codex	200(V3)	Yes	HC	25000	family	RefSeq 65	0.940089	0.939972	0.903237
One Codex	200(V3)	Yes	HC	25000	genus	RefSeq 65	0.907071	0.907522	0.841574
One Codex	200(V3)	Yes	HC	50000	family	RefSeq 65	0.939931	0.940285	0.902583
One Codex	200(V3)	Yes	HC	50000	genus	RefSeq 65	0.904874	0.9066	0.837874
One Codex	200(V3)	Yes	HC	100000	family	RefSeq 65	0.939419	0.939974	0.902255
One Codex	200(V3)	Yes	HC	100000	genus	RefSeq 65	0.906813	0.908948	0.841368
One Codex	400(V4-V5)	Yes	LC	25000	family	RefSeq 65	0.976572	0.976285	0.959346
One Codex	400(V4-V5)	Yes	LC	25000	genus	RefSeq 65	0.974708	0.974043	0.957282
One Codex	400(V4-V5)	Yes	LC	50000	family	RefSeq 65	0.976449	0.976383	0.959714
One Codex	400(V4-V5)	Yes	LC	50000	genus	RefSeq 65	0.974442	0.974188	0.957419
One Codex	400(V4-V5)	Yes	LC	100000	family	RefSeq 65	0.976382	0.976426	0.959556
One Codex	400(V4-V5)	Yes	LC	100000	genus	RefSeq 65	0.973909	0.973859	0.956718
One Codex	400(V4-V5)	Yes	MC	25000	family	RefSeq 65	0.987027	0.986828	0.976817
One Codex	400(V4-V5)	Yes	MC	25000	genus	RefSeq 65	0.985907	0.985612	0.975691
One Codex	400(V4-V5)	Yes	MC	50000	family	RefSeq 65	0.988006	0.987909	0.978518
One Codex	400(V4-V5)	Yes	MC	50000	genus	RefSeq 65	0.986873	0.986705	0.9776
One Codex	400(V4-V5)	Yes	MC	100000	family	RefSeq 65	0.986833	0.986796	0.976706
One Codex	400(V4-V5)	Yes	MC	100000	genus	RefSeq 65	0.986332	0.986248	0.976604
One Codex	400(V4-V5)	Yes	HC	25000	family	RefSeq 65	0.975255	0.97504	0.957778
One Codex	400(V4-V5)	Yes	HC	25000	genus	RefSeq 65	0.971578	0.971005	0.952851
One Codex	400(V4-V5)	Yes	HC	50000	family	RefSeq 65	0.975114	0.975094	0.957586
One Codex	400(V4-V5)	Yes	HC	50000	genus	RefSeq 65	0.972787	0.972611	0.954601
One Codex	400(V4-V5)	Yes	HC	100000	family	RefSeq 65	0.974978	0.975052	0.9574
One Codex	400(V4-V5)	Yes	HC	100000	genus	RefSeq 65	0.972384	0.972375	0.954381
One Codex	200(V3)	No	LC	25000	family	One Codex 28k	0.909302	0.910638	0.842673
One Codex	200(V3)	No	LC	25000	genus	One Codex 28k	0.833091	0.839813	0.716417
One Codex	200(V3)	No	LC	50000	family	One Codex 28k	0.907156	0.909427	0.838912
One Codex	200(V3)	No	LC	50000	genus	One Codex 28k	0.830382	0.839836	0.712228
One Codex	200(V3)	No	LC	100000	family	One Codex 28k	0.907746	0.910348	0.840076
One Codex	200(V3)	No	LC	100000	genus	One Codex 28k	0.830971	0.841511	0.71312
One Codex	200(V3)	No	MC	25000	family	One Codex 28k	0.949404	0.949542	0.907961
One Codex	200(V3)	No	MC	25000	genus	One Codex 28k	0.779207	0.793731	0.639098
One Codex	200(V3)	No	MC	50000	family	One Codex 28k	0.947969	0.948473	0.905637
One Codex	200(V3)	No	MC	50000	genus	One Codex 28k	0.775985	0.792748	0.634732
One Codex	200(V3)	No	MC	100000	family	One Codex 28k	0.949508	0.950204	0.908074
One Codex	200(V3)	No	MC	100000	genus	One Codex 28k	0.777155	0.795016	0.636315
One Codex	200(V3)	No	HC	25000	family	One Codex 28k	0.900114	0.902129	0.828703
One Codex	200(V3)	No	HC	25000	genus	One Codex 28k	0.872924	0.876905	0.777367
One Codex	200(V3)	No	HC	50000	family	One Codex 28k	0.899228	0.902006	0.827145
One Codex	200(V3)	No	HC	50000	genus	One Codex 28k	0.870061	0.875716	0.77289
One Codex	200(V3)	No	HC	100000	family	One Codex 28k	0.898586	0.901727	0.826246
One Codex	200(V3)	No	HC	100000	genus	One Codex 28k	0.871226	0.877426	0.77479
One Codex	400(V4-V5)	No	LC	25000	family	One Codex 28k	0.924724	0.925065	0.871012
One Codex	400(V4-V5)	No	LC	25000	genus	One Codex 28k	0.914898	0.915145	0.849041
One Codex	400(V4-V5)	No	LC	50000	family	One Codex 28k	0.926073	0.927091	0.873435
One Codex	400(V4-V5)	No	LC	50000	genus	One Codex 28k	0.916478	0.917952	0.851837
One Codex	400(V4-V5)	No	LC	100000	family	One Codex 28k	0.925731	0.927101	0.872964
One Codex	400(V4-V5)	No	LC	100000	genus	One Codex 28k	0.915491	0.917626	0.850273
One Codex	400(V4-V5)	No	MC	25000	family	One Codex 28k	0.95794	0.957769	0.924786
One Codex	400(V4-V5)	No	MC	25000	genus	One Codex 28k	0.956213	0.95601	0.919159
One Codex	400(V4-V5)	No	MC	50000	family	One Codex 28k	0.959181	0.95929	0.92692
One Codex	400(V4-V5)	No	MC	50000	genus	One Codex 28k	0.958047	0.958157	0.922221
One Codex	400(V4-V5)	No	MC	100000	family	One Codex 28k	0.95743	0.957788	0.923682
One Codex	400(V4-V5)	No	MC	100000	genus	One Codex 28k	0.957265	0.957647	0.920659
One Codex	400(V4-V5)	No	HC	25000	family	One Codex 28k	0.921822	0.922433	0.867621
One Codex	400(V4-V5)	No	HC	25000	genus	One Codex 28k	0.908625	0.909529	0.839512
One Codex	400(V4-V5)	No	HC	50000	family	One Codex 28k	0.919604	0.920867	0.864741
One Codex	400(V4-V5)	No	HC	50000	genus	One Codex 28k	0.908237	0.910267	0.839384
One Codex	400(V4-V5)	No	HC	100000	family	One Codex 28k	0.920133	0.921697	0.865297
One Codex	400(V4-V5)	No	HC	100000	genus	One Codex 28k	0.907834	0.910462	0.838321
One Codex	200(V3)	Yes	LC	25000	family	One Codex 28k	0.815271	0.811591	0.810579
One Codex	200(V3)	Yes	LC	25000	genus	One Codex 28k	0.817371	0.812291	0.775653
One Codex	200(V3)	Yes	LC	50000	family	One Codex 28k	0.813742	0.811821	0.810677
One Codex	200(V3)	Yes	LC	50000	genus	One Codex 28k	0.815643	0.813348	0.775003
One Codex	200(V3)	Yes	LC	100000	family	One Codex 28k	0.813902	0.812883	0.811374
One Codex	200(V3)	Yes	LC	100000	genus	One Codex 28k	0.815791	0.815049	0.775497
One Codex	200(V3)	Yes	MC	25000	family	One Codex 28k	0.852203	0.850545	0.813006
One Codex	200(V3)	Yes	MC	25000	genus	One Codex 28k	0.79641	0.794405	0.733117
One Codex	200(V3)	Yes	MC	50000	family	One Codex 28k	0.851325	0.85073	0.811219
One Codex	200(V3)	Yes	MC	50000	genus	One Codex 28k	0.794061	0.793825	0.730097
One Codex	200(V3)	Yes	MC	100000	family	One Codex 28k	0.852507	0.852699	0.81067
One Codex	200(V3)	Yes	MC	100000	genus	One Codex 28k	0.796527	0.79725	0.735308
One Codex	200(V3)	Yes	HC	25000	family	One Codex 28k	0.85269	0.851075	0.812952
One Codex	200(V3)	Yes	HC	25000	genus	One Codex 28k	0.852278	0.849917	0.79686
One Codex	200(V3)	Yes	HC	50000	family	One Codex 28k	0.851996	0.851646	0.812747
One Codex	200(V3)	Yes	HC	50000	genus	One Codex 28k	0.850986	0.85069	0.795525
One Codex	200(V3)	Yes	HC	100000	family	One Codex 28k	0.85087	0.851124	0.81162
One Codex	200(V3)	Yes	HC	100000	genus	One Codex 28k	0.851232	0.851858	0.797074
One Codex	400(V4-V5)	Yes	LC	25000	family	One Codex 28k	0.933941	0.932886	0.908625
One Codex	400(V4-V5)	Yes	LC	25000	genus	One Codex 28k	0.92402	0.922079	0.888368
One Codex	400(V4-V5)	Yes	LC	50000	family	One Codex 28k	0.935892	0.935542	0.911379
One Codex	400(V4-V5)	Yes	LC	50000	genus	One Codex 28k	0.926516	0.925817	0.892798
One Codex	400(V4-V5)	Yes	LC	100000	family	One Codex 28k	0.935341	0.935293	0.911578
One Codex	400(V4-V5)	Yes	LC	100000	genus	One Codex 28k	0.925171	0.925038	0.892297
One Codex	400(V4-V5)	Yes	MC	25000	family	One Codex 28k	0.967698	0.96722	0.950671
One Codex	400(V4-V5)	Yes	MC	25000	genus	One Codex 28k	0.95944	0.958718	0.937314
One Codex	400(V4-V5)	Yes	MC	50000	family	One Codex 28k	0.967534	0.96727	0.951773
One Codex	400(V4-V5)	Yes	MC	50000	genus	One Codex 28k	0.95965	0.959224	0.939336
One Codex	400(V4-V5)	Yes	MC	100000	family	One Codex 28k	0.967099	0.966985	0.951837
One Codex	400(V4-V5)	Yes	MC	100000	genus	One Codex 28k	0.960188	0.95998	0.941111
One Codex	400(V4-V5)	Yes	HC	25000	family	One Codex 28k	0.930043	0.92918	0.904293
One Codex	400(V4-V5)	Yes	HC	25000	genus	One Codex 28k	0.918468	0.916861	0.880352
One Codex	400(V4-V5)	Yes	HC	50000	family	One Codex 28k	0.929069	0.928748	0.904345
One Codex	400(V4-V5)	Yes	HC	50000	genus	One Codex 28k	0.917946	0.917321	0.882596
One Codex	400(V4-V5)	Yes	HC	100000	family	One Codex 28k	0.928163	0.928139	0.903437
One Codex	400(V4-V5)	Yes	HC	100000	genus	One Codex 28k	0.916937	0.916881	0.881658
One Codex	200(V3)	No	LC	25000	family	SILVA	0.611737	0.643889	0.456485
One Codex	200(V3)	No	LC	25000	genus	SILVA	0.581246	0.622881	0.416848
One Codex	200(V3)	No	LC	50000	family	SILVA	0.609825	0.645889	0.454222
One Codex	200(V3)	No	LC	50000	genus	SILVA	0.577853	0.625134	0.4134
One Codex	200(V3)	No	LC	100000	family	SILVA	0.349176	0.444665	0.215259
One Codex	200(V3)	No	LC	100000	genus	SILVA	0.342764	0.443468	0.20918
One Codex	200(V3)	No	MC	25000	family	SILVA	0.72311	0.744203	0.575086
One Codex	200(V3)	No	MC	25000	genus	SILVA	0.648569	0.684506	0.483197
One Codex	200(V3)	No	MC	50000	family	SILVA	0.711367	0.735834	0.560758
One Codex	200(V3)	No	MC	50000	genus	SILVA	0.636347	0.676665	0.469866
One Codex	200(V3)	No	MC	100000	family	SILVA	0.716408	0.741284	0.56667
One Codex	200(V3)	No	MC	100000	genus	SILVA	0.640739	0.68177	0.474531
One Codex	200(V3)	No	HC	25000	family	SILVA	0.645584	0.671836	0.496995
One Codex	200(V3)	No	HC	25000	genus	SILVA	0.617257	0.653432	0.455524
One Codex	200(V3)	No	HC	50000	family	SILVA	0.642753	0.672046	0.493503
One Codex	200(V3)	No	HC	50000	genus	SILVA	0.613751	0.654214	0.451719
One Codex	200(V3)	No	HC	100000	family	SILVA	0.643197	0.67361	0.493961
One Codex	200(V3)	No	HC	100000	genus	SILVA	0.614869	0.656855	0.452853
One Codex	400(V4-V5)	No	LC	25000	family	SILVA	0.6767	0.699585	0.529053
One Codex	400(V4-V5)	No	LC	25000	genus	SILVA	0.53429	0.57786	0.376109
One Codex	400(V4-V5)	No	LC	50000	family	SILVA	0.672903	0.69905	0.524568
One Codex	400(V4-V5)	No	LC	50000	genus	SILVA	0.53121	0.58098	0.373188
One Codex	400(V4-V5)	No	LC	100000	family	SILVA	0.37631	0.472284	0.234317
One Codex	400(V4-V5)	No	LC	100000	genus	SILVA	0.076789	0.169531	0.0405541
One Codex	400(V4-V5)	No	MC	25000	family	SILVA	0.831857	0.8392	0.723068
One Codex	400(V4-V5)	No	MC	25000	genus	SILVA	0.619128	0.657818	0.454831
One Codex	400(V4-V5)	No	MC	50000	family	SILVA	0.833247	0.841251	0.725183
One Codex	400(V4-V5)	No	MC	50000	genus	SILVA	0.621876	0.66196	0.457958
One Codex	400(V4-V5)	No	MC	100000	family	SILVA	0.831148	0.839911	0.722331
One Codex	400(V4-V5)	No	MC	100000	genus	SILVA	0.619691	0.661777	0.455603
One Codex	400(V4-V5)	No	HC	25000	family	SILVA	0.640085	0.667695	0.489939
One Codex	400(V4-V5)	No	HC	25000	genus	SILVA	0.581203	0.621279	0.420377
One Codex	400(V4-V5)	No	HC	50000	family	SILVA	0.636909	0.667354	0.486563
One Codex	400(V4-V5)	No	HC	50000	genus	SILVA	0.57861	0.623159	0.417769
One Codex	400(V4-V5)	No	HC	100000	family	SILVA	0.637695	0.669134	0.487539
One Codex	400(V4-V5)	No	HC	100000	genus	SILVA	0.57724	0.623973	0.416374
One Codex	200(V3)	Yes	LC	25000	family	SILVA	0.622924	0.6157	0.569362
One Codex	200(V3)	Yes	LC	25000	genus	SILVA	0.653705	0.637806	0.608268
One Codex	200(V3)	Yes	LC	50000	family	SILVA	0.598366	0.598633	0.526936
One Codex	200(V3)	Yes	LC	50000	genus	SILVA	0.631564	0.624452	0.569577
One Codex	200(V3)	Yes	LC	100000	family	SILVA	0.562826	0.575185	0.456952
One Codex	200(V3)	Yes	LC	100000	genus	SILVA	0.582407	0.588989	0.479437
One Codex	200(V3)	Yes	MC	25000	family	SILVA	0.741835	0.736905	0.727897
One Codex	200(V3)	Yes	MC	25000	genus	SILVA	0.699281	0.691782	0.658225
One Codex	200(V3)	Yes	MC	50000	family	SILVA	0.708096	0.705168	0.694126
One Codex	200(V3)	Yes	MC	50000	genus	SILVA	0.408358	0.419746	0.312483
One Codex	200(V3)	Yes	MC	100000	family	SILVA	0.592495	0.594221	0.526995
One Codex	200(V3)	Yes	MC	100000	genus	SILVA	0.677694	0.674875	0.640428
One Codex	200(V3)	Yes	HC	25000	family	SILVA	0.579362	0.589366	0.461101
One Codex	200(V3)	Yes	HC	25000	genus	SILVA	0.602531	0.600628	0.485232
One Codex	200(V3)	Yes	HC	50000	family	SILVA	0.652264	0.655948	0.564315
One Codex	200(V3)	Yes	HC	50000	genus	SILVA	0.640181	0.643714	0.536622
One Codex	200(V3)	Yes	HC	100000	family	SILVA	0.610405	0.619825	0.509433
One Codex	200(V3)	Yes	HC	100000	genus	SILVA	0.659755	0.663921	0.561748
One Codex	400(V4-V5)	Yes	LC	25000	family	SILVA	0.702591	0.700321	0.625302
One Codex	400(V4-V5)	Yes	LC	25000	genus	SILVA	0.65959	0.642159	0.615629
One Codex	400(V4-V5)	Yes	LC	50000	family	SILVA	0.62072	0.629556	0.512609
One Codex	400(V4-V5)	Yes	LC	50000	genus	SILVA	0.649433	0.640519	0.596613
One Codex	400(V4-V5)	Yes	LC	100000	family	SILVA	0.73733	0.738148	0.680222
One Codex	400(V4-V5)	Yes	LC	100000	genus	SILVA	0.651714	0.649767	0.587249
One Codex	400(V4-V5)	Yes	MC	25000	family	SILVA	0.737328	0.739707	0.643449
One Codex	400(V4-V5)	Yes	MC	25000	genus	SILVA	0.717169	0.709587	0.676568
One Codex	400(V4-V5)	Yes	MC	50000	family	SILVA	0.760189	0.763732	0.671753
One Codex	400(V4-V5)	Yes	MC	50000	genus	SILVA	0.714689	0.71252	0.657516
One Codex	400(V4-V5)	Yes	MC	100000	family	SILVA	0.716628	0.726691	0.605782
One Codex	400(V4-V5)	Yes	MC	100000	genus	SILVA	0.72098	0.718066	0.682422
One Codex	400(V4-V5)	Yes	HC	25000	family	SILVA	0.653674	0.659023	0.548676
One Codex	400(V4-V5)	Yes	HC	25000	genus	SILVA	0.639817	0.630075	0.549148
One Codex	400(V4-V5)	Yes	HC	50000	family	SILVA	0.740655	0.739239	0.693944
One Codex	400(V4-V5)	Yes	HC	50000	genus	SILVA	0.69532	0.689828	0.636502
One Codex	400(V4-V5)	Yes	HC	100000	family	SILVA	0.691065	0.694318	0.615383
One Codex	400(V4-V5)	Yes	HC	100000	genus	SILVA	0.670989	0.668985	0.60286
QIIME UCLUST	200(V3)	No	LC	25000	family	SILVA	0.923329	0.923882	0.869121
QIIME UCLUST	200(V3)	No	LC	25000	genus	SILVA	0.768632	0.784172	0.626027
QIIME UCLUST	200(V3)	No	LC	50000	family	SILVA	0.917214	0.918716	0.858549
QIIME UCLUST	200(V3)	No	LC	50000	genus	SILVA	0.764397	0.783257	0.620526
QIIME UCLUST	200(V3)	No	LC	100000	family	SILVA	0.920208	0.92174	0.865669
QIIME UCLUST	200(V3)	No	LC	100000	genus	SILVA	0.756149	0.777675	0.609822
QIIME UCLUST	200(V3)	No	MC	25000	family	SILVA	0.961897	0.961715	0.932448
QIIME UCLUST	200(V3)	No	MC	25000	genus	SILVA	0.838833	0.846901	0.723213
QIIME UCLUST	200(V3)	No	MC	50000	family	SILVA	0.961865	0.961983	0.931611
QIIME UCLUST	200(V3)	No	MC	50000	genus	SILVA	0.834927	0.844525	0.717512
QIIME UCLUST	200(V3)	No	MC	100000	family	SILVA	0.961136	0.961443	0.930233
QIIME UCLUST	200(V3)	No	MC	100000	genus	SILVA	0.83891	0.848604	0.723966
QIIME UCLUST	200(V3)	No	HC	25000	family	SILVA	0.899103	0.900578	0.833437
QIIME UCLUST	200(V3)	No	HC	25000	genus	SILVA	0.805491	0.816936	0.676918
QIIME UCLUST	200(V3)	No	HC	50000	family	SILVA	0.920099	0.921146	0.869388
QIIME UCLUST	200(V3)	No	HC	50000	genus	SILVA	0.8117	0.823819	0.686869
QIIME UCLUST	200(V3)	No	HC	100000	family	SILVA	0.927417	0.928697	0.877453
QIIME UCLUST	200(V3)	No	HC	100000	genus	SILVA	0.850039	0.858583	0.741927
QIIME UCLUST	400(V4-V5)	No	LC	25000	family	SILVA	0.975034	0.974738	0.95727
QIIME UCLUST	400(V4-V5)	No	LC	25000	genus	SILVA	0.893553	0.894905	0.811196
QIIME UCLUST	400(V4-V5)	No	LC	50000	family	SILVA	0.969455	0.969447	0.947383
QIIME UCLUST	400(V4-V5)	No	LC	50000	genus	SILVA	0.879761	0.882985	0.795512
QIIME UCLUST	400(V4-V5)	No	LC	100000	family	SILVA	0.974014	0.974088	0.95542
QIIME UCLUST	400(V4-V5)	No	LC	100000	genus	SILVA	0.891516	0.895528	0.808225
QIIME UCLUST	400(V4-V5)	No	MC	25000	family	SILVA	0.986351	0.986143	0.976024
QIIME UCLUST	400(V4-V5)	No	MC	25000	genus	SILVA	0.888935	0.891219	0.804888
QIIME UCLUST	400(V4-V5)	No	MC	50000	family	SILVA	0.983998	0.983892	0.971504
QIIME UCLUST	400(V4-V5)	No	MC	50000	genus	SILVA	0.89327	0.896553	0.808855
QIIME UCLUST	400(V4-V5)	No	MC	100000	family	SILVA	0.983496	0.983471	0.970719
QIIME UCLUST	400(V4-V5)	No	MC	100000	genus	SILVA	0.888759	0.892629	0.804687
QIIME UCLUST	400(V4-V5)	No	HC	25000	family	SILVA	0.97131	0.971098	0.95127
QIIME UCLUST	400(V4-V5)	No	HC	25000	genus	SILVA	0.930476	0.930451	0.878081
QIIME UCLUST	400(V4-V5)	No	HC	50000	family	SILVA	0.971268	0.971276	0.951293
QIIME UCLUST	400(V4-V5)	No	HC	50000	genus	SILVA	0.93169	0.932706	0.877294
QIIME UCLUST	400(V4-V5)	No	HC	100000	family	SILVA	0.971546	0.971653	0.95193
QIIME UCLUST	400(V4-V5)	No	HC	100000	genus	SILVA	0.925601	0.927129	0.869472
QIIME UCLUST	200(V3)	Yes	LC	25000	family	SILVA	0.89292	0.893114	0.834894
QIIME UCLUST	200(V3)	Yes	LC	25000	genus	SILVA	0.7395	0.743872	0.628878
QIIME UCLUST	200(V3)	Yes	LC	50000	family	SILVA	0.869972	0.869424	0.83708
QIIME UCLUST	200(V3)	Yes	LC	50000	genus	SILVA	0.744472	0.748398	0.651055
QIIME UCLUST	200(V3)	Yes	LC	100000	family	SILVA	0.880838	0.880586	0.858173
QIIME UCLUST	200(V3)	Yes	LC	100000	genus	SILVA	0.751324	0.755475	0.666524
QIIME UCLUST	200(V3)	Yes	MC	25000	family	SILVA	0.906378	0.905357	0.873182
QIIME UCLUST	200(V3)	Yes	MC	25000	genus	SILVA	0.723391	0.725393	0.631686
QIIME UCLUST	200(V3)	Yes	MC	50000	family	SILVA	0.894318	0.893192	0.888713
QIIME UCLUST	200(V3)	Yes	MC	50000	genus	SILVA	0.745714	0.745898	0.678478
QIIME UCLUST	200(V3)	Yes	MC	100000	family	SILVA	0.945029	0.94509	0.917908
QIIME UCLUST	200(V3)	Yes	MC	100000	genus	SILVA	0.75818	0.76193	0.675409
QIIME UCLUST	200(V3)	Yes	HC	25000	family	SILVA	0.887677	0.887871	0.832409
QIIME UCLUST	200(V3)	Yes	HC	25000	genus	SILVA	0.76729	0.775762	0.64521
QIIME UCLUST	200(V3)	Yes	HC	50000	family	SILVA	0.898697	0.899374	0.849573
QIIME UCLUST	200(V3)	Yes	HC	50000	genus	SILVA	0.807612	0.813629	0.705607
QIIME UCLUST	200(V3)	Yes	HC	100000	family	SILVA	0.896399	0.897927	0.84116
QIIME UCLUST	200(V3)	Yes	HC	100000	genus	SILVA	0.78709	0.796669	0.67478
QIIME UCLUST	400(V4-V5)	Yes	LC	25000	family	SILVA	0.930239	0.929755	0.891786
QIIME UCLUST	400(V4-V5)	Yes	LC	25000	genus	SILVA	0.812166	0.813267	0.715656
QIIME UCLUST	400(V4-V5)	Yes	LC	50000	family	SILVA	0.930327	0.930589	0.890942
QIIME UCLUST	400(V4-V5)	Yes	LC	50000	genus	SILVA	0.830308	0.830093	0.767342
QIIME UCLUST	400(V4-V5)	Yes	LC	100000	family	SILVA	0.93728	0.937706	0.901966
QIIME UCLUST	400(V4-V5)	Yes	LC	100000	genus	SILVA	0.828089	0.831786	0.745195
QIIME UCLUST	400(V4-V5)	Yes	MC	25000	family	SILVA	0.935182	0.934634	0.900884
QIIME UCLUST	400(V4-V5)	Yes	MC	25000	genus	SILVA	0.810747	0.812487	0.721204
QIIME UCLUST	400(V4-V5)	Yes	MC	50000	family	SILVA	0.942564	0.942409	0.912122
QIIME UCLUST	400(V4-V5)	Yes	MC	50000	genus	SILVA	0.802046	0.803958	0.720782
QIIME UCLUST	400(V4-V5)	Yes	MC	100000	family	SILVA	0.949066	0.949106	0.922663
QIIME UCLUST	400(V4-V5)	Yes	MC	100000	genus	SILVA	0.813832	0.817909	0.726673
QIIME UCLUST	400(V4-V5)	Yes	HC	25000	family	SILVA	0.932059	0.931932	0.892436
QIIME UCLUST	400(V4-V5)	Yes	HC	25000	genus	SILVA	0.876387	0.875851	0.810495
QIIME UCLUST	400(V4-V5)	Yes	HC	50000	family	SILVA	0.937671	0.937947	0.901608
QIIME UCLUST	400(V4-V5)	Yes	HC	50000	genus	SILVA	0.87342	0.875205	0.801447
QIIME UCLUST	400(V4-V5)	Yes	HC	100000	family	SILVA	0.935587	0.935917	0.903838
QIIME UCLUST	400(V4-V5)	Yes	HC	100000	genus	SILVA	0.883303	0.884731	0.824261
QIIME UCLUST	200(V3)	No	LC	25000	family	Greengenes	0.949736	0.94926	0.923575
QIIME UCLUST	200(V3)	No	LC	25000	genus	Greengenes	0.732081	0.751154	0.583693
QIIME UCLUST	200(V3)	No	LC	50000	family	Greengenes	0.95237	0.952608	0.919487
QIIME UCLUST	200(V3)	No	LC	50000	genus	Greengenes	0.72228	0.747692	0.567908
QIIME UCLUST	200(V3)	No	LC	100000	family	Greengenes	0.958109	0.95843	0.928766
QIIME UCLUST	200(V3)	No	LC	100000	genus	Greengenes	0.733476	0.758854	0.580881
QIIME UCLUST	200(V3)	No	MC	25000	family	Greengenes	0.979291	0.97902	0.965225
QIIME UCLUST	200(V3)	No	MC	25000	genus	Greengenes	0.835317	0.843532	0.718951
QIIME UCLUST	200(V3)	No	MC	50000	family	Greengenes	0.97656	0.976417	0.962019
QIIME UCLUST	200(V3)	No	MC	50000	genus	Greengenes	0.840683	0.849183	0.727565
QIIME UCLUST	200(V3)	No	MC	100000	family	Greengenes	0.979462	0.979424	0.966762
QIIME UCLUST	200(V3)	No	MC	100000	genus	Greengenes	0.831189	0.841873	0.712505
QIIME UCLUST	200(V3)	No	HC	25000	family	Greengenes	0.942674	0.942473	0.911168
QIIME UCLUST	200(V3)	No	HC	25000	genus	Greengenes	0.785958	0.797732	0.657629
QIIME UCLUST	200(V3)	No	HC	50000	family	Greengenes	0.947168	0.947195	0.921342
QIIME UCLUST	200(V3)	No	HC	50000	genus	Greengenes	0.764949	0.78133	0.629453
QIIME UCLUST	200(V3)	No	HC	100000	family	Greengenes	0.94887	0.948998	0.925763
QIIME UCLUST	200(V3)	No	HC	100000	genus	Greengenes	0.774574	0.79078	0.641721
QIIME UCLUST	400(V4-V5)	No	LC	25000	family	Greengenes	0.963198	0.962924	0.936726
QIIME UCLUST	400(V4-V5)	No	LC	25000	genus	Greengenes	0.82847	0.836108	0.71081
QIIME UCLUST	400(V4-V5)	No	LC	50000	family	Greengenes	0.96373	0.96379	0.937809
QIIME UCLUST	400(V4-V5)	No	LC	50000	genus	Greengenes	0.838963	0.847046	0.72815
QIIME UCLUST	400(V4-V5)	No	LC	100000	family	Greengenes	0.963364	0.963587	0.937261
QIIME UCLUST	400(V4-V5)	No	LC	100000	genus	Greengenes	0.831076	0.841381	0.714887
QIIME UCLUST	400(V4-V5)	No	MC	25000	family	Greengenes	0.980712	0.980466	0.965872
QIIME UCLUST	400(V4-V5)	No	MC	25000	genus	Greengenes	0.740673	0.761127	0.589679
QIIME UCLUST	400(V4-V5)	No	MC	50000	family	Greengenes	0.981172	0.98107	0.966519
QIIME UCLUST	400(V4-V5)	No	MC	50000	genus	Greengenes	0.747557	0.768768	0.59817
QIIME UCLUST	400(V4-V5)	No	MC	100000	family	Greengenes	0.980945	0.980935	0.966356
QIIME UCLUST	400(V4-V5)	No	MC	100000	genus	Greengenes	0.74675	0.76932	0.597309
QIIME UCLUST	400(V4-V5)	No	HC	25000	family	Greengenes	0.960396	0.960252	0.932717
QIIME UCLUST	400(V4-V5)	No	HC	25000	genus	Greengenes	0.818334	0.82695	0.698996
QIIME UCLUST	400(V4-V5)	No	HC	50000	family	Greengenes	0.960358	0.960502	0.932896
QIIME UCLUST	400(V4-V5)	No	HC	50000	genus	Greengenes	0.811539	0.822925	0.689266
QIIME UCLUST	400(V4-V5)	No	HC	100000	family	Greengenes	0.960033	0.960323	0.932308
QIIME UCLUST	400(V4-V5)	No	HC	100000	genus	Greengenes	0.80207	0.816103	0.67398
QIIME UCLUST	200(V3)	Yes	LC	25000	family	Greengenes	0.913997	0.913396	0.872219
QIIME UCLUST	200(V3)	Yes	LC	25000	genus	Greengenes	0.736676	0.742652	0.621976
QIIME UCLUST	200(V3)	Yes	LC	50000	family	Greengenes	0.917013	0.916696	0.888749
QIIME UCLUST	200(V3)	Yes	LC	50000	genus	Greengenes	0.721388	0.730686	0.608018
QIIME UCLUST	200(V3)	Yes	LC	100000	family	Greengenes	0.920577	0.920771	0.889264
QIIME UCLUST	200(V3)	Yes	LC	100000	genus	Greengenes	0.738084	0.748353	0.626519
QIIME UCLUST	200(V3)	Yes	MC	25000	family	Greengenes	0.956869	0.956398	0.932633
QIIME UCLUST	200(V3)	Yes	MC	25000	genus	Greengenes	0.725221	0.730756	0.619125
QIIME UCLUST	200(V3)	Yes	MC	50000	family	Greengenes	0.961297	0.961073	0.941175
QIIME UCLUST	200(V3)	Yes	MC	50000	genus	Greengenes	0.723305	0.73062	0.617723
QIIME UCLUST	200(V3)	Yes	MC	100000	family	Greengenes	0.9596	0.959642	0.936266
QIIME UCLUST	200(V3)	Yes	MC	100000	genus	Greengenes	0.731899	0.739579	0.630124
QIIME UCLUST	200(V3)	Yes	HC	25000	family	Greengenes	0.898928	0.898666	0.852554
QIIME UCLUST	200(V3)	Yes	HC	25000	genus	Greengenes	0.725056	0.739182	0.588855
QIIME UCLUST	200(V3)	Yes	HC	50000	family	Greengenes	0.90745	0.907986	0.861817
QIIME UCLUST	200(V3)	Yes	HC	50000	genus	Greengenes	0.751664	0.765504	0.622887
QIIME UCLUST	200(V3)	Yes	HC	100000	family	Greengenes	0.904682	0.905675	0.857265
QIIME UCLUST	200(V3)	Yes	HC	100000	genus	Greengenes	0.783256	0.794353	0.66644
QIIME UCLUST	400(V4-V5)	Yes	LC	25000	family	Greengenes	0.933629	0.933168	0.896903
QIIME UCLUST	400(V4-V5)	Yes	LC	25000	genus	Greengenes	0.754835	0.756428	0.658262
QIIME UCLUST	400(V4-V5)	Yes	LC	50000	family	Greengenes	0.938237	0.938357	0.904
QIIME UCLUST	400(V4-V5)	Yes	LC	50000	genus	Greengenes	0.743427	0.751249	0.633208
QIIME UCLUST	400(V4-V5)	Yes	LC	100000	family	Greengenes	0.939215	0.939619	0.90503
QIIME UCLUST	400(V4-V5)	Yes	LC	100000	genus	Greengenes	0.753175	0.758949	0.660512
QIIME UCLUST	400(V4-V5)	Yes	MC	25000	family	Greengenes	0.941125	0.940496	0.911852
QIIME UCLUST	400(V4-V5)	Yes	MC	25000	genus	Greengenes	0.657358	0.667926	0.534294
QIIME UCLUST	400(V4-V5)	Yes	MC	50000	family	Greengenes	0.946984	0.946846	0.91816
QIIME UCLUST	400(V4-V5)	Yes	MC	50000	genus	Greengenes	0.681237	0.694996	0.555021
QIIME UCLUST	400(V4-V5)	Yes	MC	100000	family	Greengenes	0.952368	0.952351	0.929197
QIIME UCLUST	400(V4-V5)	Yes	MC	100000	genus	Greengenes	0.680401	0.69468	0.557444
QIIME UCLUST	400(V4-V5)	Yes	HC	25000	family	Greengenes	0.936014	0.935771	0.900632
QIIME UCLUST	400(V4-V5)	Yes	HC	25000	genus	Greengenes	0.770328	0.779081	0.647462
QIIME UCLUST	400(V4-V5)	Yes	HC	50000	family	Greengenes	0.94137	0.941595	0.907637
QIIME UCLUST	400(V4-V5)	Yes	HC	50000	genus	Greengenes	0.783119	0.792827	0.665935
QIIME UCLUST	400(V4-V5)	Yes	HC	100000	family	Greengenes	0.940955	0.941347	0.908198
QIIME UCLUST	400(V4-V5)	Yes	HC	100000	genus	Greengenes	0.760578	0.774893	0.633572
QIIME SortMeRna SUMACLUST	200(V3)	No	LC	25000	family	Greengenes	0.947867	0.947485	0.918367
QIIME SortMeRna SUMACLUST	200(V3)	No	LC	25000	genus	Greengenes	0.720546	0.740829	0.570375
QIIME SortMeRna SUMACLUST	200(V3)	No	LC	50000	family	Greengenes	0.960928	0.960981	0.935262
QIIME SortMeRna SUMACLUST	200(V3)	No	LC	50000	genus	Greengenes	0.73297	0.752575	0.590273
QIIME SortMeRna SUMACLUST	200(V3)	No	LC	100000	family	Greengenes	0.960461	0.960618	0.936604
QIIME SortMeRna SUMACLUST	200(V3)	No	LC	100000	genus	Greengenes	0.727045	0.753294	0.573493
QIIME SortMeRna SUMACLUST	200(V3)	No	MC	25000	family	Greengenes	0.976776	0.976507	0.960274
QIIME SortMeRna SUMACLUST	200(V3)	No	MC	25000	genus	Greengenes	0.83639	0.844607	0.72008
QIIME SortMeRna SUMACLUST	200(V3)	No	MC	50000	family	Greengenes	0.975115	0.974972	0.959579
QIIME SortMeRna SUMACLUST	200(V3)	No	MC	50000	genus	Greengenes	0.82705	0.835856	0.71308
QIIME SortMeRna SUMACLUST	200(V3)	No	MC	100000	family	Greengenes	0.982692	0.982657	0.971041
QIIME SortMeRna SUMACLUST	200(V3)	No	MC	100000	genus	Greengenes	0.818367	0.829414	0.699
QIIME SortMeRna SUMACLUST	200(V3)	No	HC	25000	family	Greengenes	0.944784	0.944444	0.917703
QIIME SortMeRna SUMACLUST	200(V3)	No	HC	25000	genus	Greengenes	0.774766	0.787603	0.643476
QIIME SortMeRna SUMACLUST	200(V3)	No	HC	50000	family	Greengenes	0.950124	0.950113	0.926256
QIIME SortMeRna SUMACLUST	200(V3)	No	HC	50000	genus	Greengenes	0.785401	0.799299	0.656006
QIIME SortMeRna SUMACLUST	200(V3)	No	HC	100000	family	Greengenes	0.949345	0.949732	0.918178
QIIME SortMeRna SUMACLUST	200(V3)	No	HC	100000	genus	Greengenes	0.775798	0.792946	0.64022
QIIME SortMeRna SUMACLUST	400(V4-V5)	No	LC	25000	family	Greengenes	0.957326	0.957204	0.923855
QIIME SortMeRna SUMACLUST	400(V4-V5)	No	LC	25000	genus	Greengenes	0.853001	0.858583	0.745629
QIIME SortMeRna SUMACLUST	400(V4-V5)	No	LC	50000	family	Greengenes	0.957681	0.957948	0.924432
QIIME SortMeRna SUMACLUST	400(V4-V5)	No	LC	50000	genus	Greengenes	0.833671	0.842938	0.717803
QIIME SortMeRna SUMACLUST	400(V4-V5)	No	LC	100000	family	Greengenes	0.957336	0.957793	0.92385
QIIME SortMeRna SUMACLUST	400(V4-V5)	No	LC	100000	genus	Greengenes	0.834328	0.844698	0.717741
QIIME SortMeRna SUMACLUST	400(V4-V5)	No	MC	25000	family	Greengenes	0.985533	0.985328	0.9742
QIIME SortMeRna SUMACLUST	400(V4-V5)	No	MC	25000	genus	Greengenes	0.744607	0.764635	0.59422
QIIME SortMeRna SUMACLUST	400(V4-V5)	No	MC	50000	family	Greengenes	0.977973	0.977909	0.959454
QIIME SortMeRna SUMACLUST	400(V4-V5)	No	MC	50000	genus	Greengenes	0.752186	0.772906	0.603483
QIIME SortMeRna SUMACLUST	400(V4-V5)	No	MC	100000	family	Greengenes	0.985329	0.985303	0.973885
QIIME SortMeRna SUMACLUST	400(V4-V5)	No	MC	100000	genus	Greengenes	0.750919	0.772959	0.602284
QIIME SortMeRna SUMACLUST	400(V4-V5)	No	HC	25000	family	Greengenes	0.968392	0.968228	0.945395
QIIME SortMeRna SUMACLUST	400(V4-V5)	No	HC	25000	genus	Greengenes	0.814223	0.824544	0.689
QIIME SortMeRna SUMACLUST	400(V4-V5)	No	HC	50000	family	Greengenes	0.96871	0.96877	0.946169
QIIME SortMeRna SUMACLUST	400(V4-V5)	No	HC	50000	genus	Greengenes	0.815742	0.827383	0.692388
QIIME SortMeRna SUMACLUST	400(V4-V5)	No	HC	100000	family	Greengenes	0.968477	0.968651	0.945721
QIIME SortMeRna SUMACLUST	400(V4-V5)	No	HC	100000	genus	Greengenes	0.807669	0.821578	0.679656
QIIME SortMeRna SUMACLUST	200(V3)	Yes	LC	25000	family	Greengenes	0.854586	0.853576	0.802841
QIIME SortMeRna SUMACLUST	200(V3)	Yes	LC	25000	genus	Greengenes	0.708314	0.718729	0.580703
QIIME SortMeRna SUMACLUST	200(V3)	Yes	LC	50000	family	Greengenes	0.932721	0.932846	0.89728
QIIME SortMeRna SUMACLUST	200(V3)	Yes	LC	50000	genus	Greengenes	0.720572	0.737978	0.58271
QIIME SortMeRna SUMACLUST	200(V3)	Yes	LC	100000	family	Greengenes	0.920029	0.919871	0.901311
QIIME SortMeRna SUMACLUST	200(V3)	Yes	LC	100000	genus	Greengenes	0.801717	0.807699	0.707769
QIIME SortMeRna SUMACLUST	200(V3)	Yes	MC	25000	family	Greengenes	0.959634	0.959132	0.938653
QIIME SortMeRna SUMACLUST	200(V3)	Yes	MC	25000	genus	Greengenes	0.807813	0.812799	0.705805
QIIME SortMeRna SUMACLUST	200(V3)	Yes	MC	50000	family	Greengenes	0.959755	0.959627	0.936116
QIIME SortMeRna SUMACLUST	200(V3)	Yes	MC	50000	genus	Greengenes	0.816777	0.823155	0.713806
QIIME SortMeRna SUMACLUST	200(V3)	Yes	MC	100000	family	Greengenes	0.964368	0.9644	0.942807
QIIME SortMeRna SUMACLUST	200(V3)	Yes	MC	100000	genus	Greengenes	0.828244	0.837182	0.716663
QIIME SortMeRna SUMACLUST	200(V3)	Yes	HC	25000	family	Greengenes	0.912645	0.911974	0.877716
QIIME SortMeRna SUMACLUST	200(V3)	Yes	HC	25000	genus	Greengenes	0.766521	0.776456	0.641443
QIIME SortMeRna SUMACLUST	200(V3)	Yes	HC	50000	family	Greengenes	0.91804	0.918417	0.877118
QIIME SortMeRna SUMACLUST	200(V3)	Yes	HC	50000	genus	Greengenes	0.748826	0.763355	0.618478
QIIME SortMeRna SUMACLUST	200(V3)	Yes	HC	100000	family	Greengenes	0.919223	0.919551	0.886131
QIIME SortMeRna SUMACLUST	200(V3)	Yes	HC	100000	genus	Greengenes	0.770659	0.783381	0.6489
QIIME SortMeRna SUMACLUST	400(V4-V5)	Yes	LC	25000	family	Greengenes	0.953354	0.953019	0.923055
QIIME SortMeRna SUMACLUST	400(V4-V5)	Yes	LC	25000	genus	Greengenes	0.770529	0.771478	0.680539
QIIME SortMeRna SUMACLUST	400(V4-V5)	Yes	LC	50000	family	Greengenes	0.958748	0.958767	0.932454
QIIME SortMeRna SUMACLUST	400(V4-V5)	Yes	LC	50000	genus	Greengenes	0.744998	0.76202	0.605836
QIIME SortMeRna SUMACLUST	400(V4-V5)	Yes	LC	100000	family	Greengenes	0.957924	0.95811	0.932049
QIIME SortMeRna SUMACLUST	400(V4-V5)	Yes	LC	100000	genus	Greengenes	0.761222	0.771968	0.646178
QIIME SortMeRna SUMACLUST	400(V4-V5)	Yes	MC	25000	family	Greengenes	0.968421	0.968033	0.948885
QIIME SortMeRna SUMACLUST	400(V4-V5)	Yes	MC	25000	genus	Greengenes	0.645227	0.657358	0.518847
QIIME SortMeRna SUMACLUST	400(V4-V5)	Yes	MC	50000	family	Greengenes	0.969628	0.969502	0.949429
QIIME SortMeRna SUMACLUST	400(V4-V5)	Yes	MC	50000	genus	Greengenes	0.619273	0.643227	0.476338
QIIME SortMeRna SUMACLUST	400(V4-V5)	Yes	MC	100000	family	Greengenes	0.973604	0.973595	0.956237
QIIME SortMeRna SUMACLUST	400(V4-V5)	Yes	MC	100000	genus	Greengenes	0.675223	0.685433	0.565769
QIIME SortMeRna SUMACLUST	400(V4-V5)	Yes	HC	25000	family	Greengenes	0.947938	0.947747	0.916219
QIIME SortMeRna SUMACLUST	400(V4-V5)	Yes	HC	25000	genus	Greengenes	0.782831	0.792595	0.657938
QIIME SortMeRna SUMACLUST	400(V4-V5)	Yes	HC	50000	family	Greengenes	0.953638	0.953814	0.923623
QIIME SortMeRna SUMACLUST	400(V4-V5)	Yes	HC	50000	genus	Greengenes	0.795133	0.805633	0.675677
QIIME SortMeRna SUMACLUST	400(V4-V5)	Yes	HC	100000	family	Greengenes	0.957166	0.957459	0.928926
QIIME SortMeRna SUMACLUST	400(V4-V5)	Yes	HC	100000	genus	Greengenes	0.804641	0.81572	0.686736
QIIME SortMeRna SUMACLUST	200(V3)	No	LC	25000	family	SILVA	0.921729	0.922057	0.870007
QIIME SortMeRna SUMACLUST	200(V3)	No	LC	25000	genus	SILVA	0.778109	0.788696	0.649316
QIIME SortMeRna SUMACLUST	200(V3)	No	LC	50000	family	SILVA	0.921028	0.922191	0.867002
QIIME SortMeRna SUMACLUST	200(V3)	No	LC	50000	genus	SILVA	0.758116	0.775015	0.620246
QIIME SortMeRna SUMACLUST	200(V3)	No	LC	100000	family	SILVA	0.9282	0.929299	0.880265
QIIME SortMeRna SUMACLUST	200(V3)	No	LC	100000	genus	SILVA	0.767695	0.784088	0.634172
QIIME SortMeRna SUMACLUST	200(V3)	No	MC	25000	family	SILVA	0.954398	0.954357	0.918656
QIIME SortMeRna SUMACLUST	200(V3)	No	MC	25000	genus	SILVA	0.831923	0.839485	0.718483
QIIME SortMeRna SUMACLUST	200(V3)	No	MC	50000	family	SILVA	0.959292	0.959471	0.926685
QIIME SortMeRna SUMACLUST	200(V3)	No	MC	50000	genus	SILVA	0.823827	0.833663	0.705895
QIIME SortMeRna SUMACLUST	200(V3)	No	MC	100000	family	SILVA	0.973922	0.973963	0.954583
QIIME SortMeRna SUMACLUST	200(V3)	No	MC	100000	genus	SILVA	0.849141	0.856501	0.744904
QIIME SortMeRna SUMACLUST	200(V3)	No	HC	25000	family	SILVA	0.906969	0.907993	0.847121
QIIME SortMeRna SUMACLUST	200(V3)	No	HC	25000	genus	SILVA	0.80039	0.811435	0.67401
QIIME SortMeRna SUMACLUST	200(V3)	No	HC	50000	family	SILVA	0.920302	0.921636	0.865756
QIIME SortMeRna SUMACLUST	200(V3)	No	HC	50000	genus	SILVA	0.835906	0.84399	0.727012
QIIME SortMeRna SUMACLUST	200(V3)	No	HC	100000	family	SILVA	0.907058	0.908916	0.848704
QIIME SortMeRna SUMACLUST	200(V3)	No	HC	100000	genus	SILVA	0.829579	0.839196	0.717447
QIIME SortMeRna SUMACLUST	400(V4-V5)	No	LC	25000	family	SILVA	0.976486	0.976255	0.95727
QIIME SortMeRna SUMACLUST	400(V4-V5)	No	LC	25000	genus	SILVA	0.885816	0.886689	0.80658
QIIME SortMeRna SUMACLUST	400(V4-V5)	No	LC	50000	family	SILVA	0.970649	0.970687	0.947383
QIIME SortMeRna SUMACLUST	400(V4-V5)	No	LC	50000	genus	SILVA	0.875075	0.878588	0.789101
QIIME SortMeRna SUMACLUST	400(V4-V5)	No	LC	100000	family	SILVA	0.9706	0.970771	0.94728
QIIME SortMeRna SUMACLUST	400(V4-V5)	No	LC	100000	genus	SILVA	0.885522	0.890461	0.79567
QIIME SortMeRna SUMACLUST	400(V4-V5)	No	MC	25000	family	SILVA	0.984126	0.983898	0.971987
QIIME SortMeRna SUMACLUST	400(V4-V5)	No	MC	25000	genus	SILVA	0.889234	0.892168	0.801092
QIIME SortMeRna SUMACLUST	400(V4-V5)	No	MC	50000	family	SILVA	0.983851	0.983741	0.971504
QIIME SortMeRna SUMACLUST	400(V4-V5)	No	MC	50000	genus	SILVA	0.893598	0.897046	0.808117
QIIME SortMeRna SUMACLUST	400(V4-V5)	No	MC	100000	family	SILVA	0.983367	0.98334	0.970719
QIIME SortMeRna SUMACLUST	400(V4-V5)	No	MC	100000	genus	SILVA	0.884639	0.888737	0.799037
QIIME SortMeRna SUMACLUST	400(V4-V5)	No	HC	25000	family	SILVA	0.970649	0.970414	0.95127
QIIME SortMeRna SUMACLUST	400(V4-V5)	No	HC	25000	genus	SILVA	0.929106	0.929696	0.8691
QIIME SortMeRna SUMACLUST	400(V4-V5)	No	HC	50000	family	SILVA	0.970507	0.970494	0.951293
QIIME SortMeRna SUMACLUST	400(V4-V5)	No	HC	50000	genus	SILVA	0.932082	0.933174	0.87726
QIIME SortMeRna SUMACLUST	400(V4-V5)	No	HC	100000	family	SILVA	0.966258	0.966427	0.943247
QIIME SortMeRna SUMACLUST	400(V4-V5)	No	HC	100000	genus	SILVA	0.926161	0.927955	0.866842
QIIME SortMeRna SUMACLUST	200(V3)	Yes	LC	25000	family	SILVA	0.906554	0.906253	0.858014
QIIME SortMeRna SUMACLUST	200(V3)	Yes	LC	25000	genus	SILVA	0.751359	0.75937	0.628157
QIIME SortMeRna SUMACLUST	200(V3)	Yes	LC	50000	family	SILVA	0.911391	0.912037	0.862756
QIIME SortMeRna SUMACLUST	200(V3)	Yes	LC	50000	genus	SILVA	0.756836	0.767038	0.637427
QIIME SortMeRna SUMACLUST	200(V3)	Yes	LC	100000	family	SILVA	0.907897	0.908473	0.86748
QIIME SortMeRna SUMACLUST	200(V3)	Yes	LC	100000	genus	SILVA	0.760062	0.769189	0.651062
QIIME SortMeRna SUMACLUST	200(V3)	Yes	MC	25000	family	SILVA	0.950715	0.950285	0.922019
QIIME SortMeRna SUMACLUST	200(V3)	Yes	MC	25000	genus	SILVA	0.775543	0.774735	0.707289
QIIME SortMeRna SUMACLUST	200(V3)	Yes	MC	50000	family	SILVA	0.954764	0.954576	0.931152
QIIME SortMeRna SUMACLUST	200(V3)	Yes	MC	50000	genus	SILVA	0.819291	0.823898	0.725436
QIIME SortMeRna SUMACLUST	200(V3)	Yes	MC	100000	family	SILVA	0.958807	0.958835	0.935927
QIIME SortMeRna SUMACLUST	200(V3)	Yes	MC	100000	genus	SILVA	0.841367	0.846789	0.747721
QIIME SortMeRna SUMACLUST	200(V3)	Yes	HC	25000	family	SILVA	0.89902	0.899038	0.848733
QIIME SortMeRna SUMACLUST	200(V3)	Yes	HC	25000	genus	SILVA	0.804449	0.810234	0.694557
QIIME SortMeRna SUMACLUST	200(V3)	Yes	HC	50000	family	SILVA	0.885058	0.886634	0.823944
QIIME SortMeRna SUMACLUST	200(V3)	Yes	HC	50000	genus	SILVA	0.808511	0.816324	0.698953
QIIME SortMeRna SUMACLUST	200(V3)	Yes	HC	100000	family	SILVA	0.901218	0.902602	0.848419
QIIME SortMeRna SUMACLUST	200(V3)	Yes	HC	100000	genus	SILVA	0.816281	0.82384	0.713047
QIIME SortMeRna SUMACLUST	400(V4-V5)	Yes	LC	25000	family	SILVA	0.946731	0.946294	0.914654
QIIME SortMeRna SUMACLUST	400(V4-V5)	Yes	LC	25000	genus	SILVA	0.897369	0.895684	0.847903
QIIME SortMeRna SUMACLUST	400(V4-V5)	Yes	LC	50000	family	SILVA	0.959359	0.959373	0.933068
QIIME SortMeRna SUMACLUST	400(V4-V5)	Yes	LC	50000	genus	SILVA	0.842915	0.845635	0.759233
QIIME SortMeRna SUMACLUST	400(V4-V5)	Yes	LC	100000	family	SILVA	0.957522	0.957642	0.933509
QIIME SortMeRna SUMACLUST	400(V4-V5)	Yes	LC	100000	genus	SILVA	0.8469	0.85062	0.764359
QIIME SortMeRna SUMACLUST	400(V4-V5)	Yes	MC	25000	family	SILVA	0.959903	0.95954	0.933245
QIIME SortMeRna SUMACLUST	400(V4-V5)	Yes	MC	25000	genus	SILVA	0.856559	0.857981	0.77419
QIIME SortMeRna SUMACLUST	400(V4-V5)	Yes	MC	50000	family	SILVA	0.97221	0.972063	0.953908
QIIME SortMeRna SUMACLUST	400(V4-V5)	Yes	MC	50000	genus	SILVA	0.893616	0.892082	0.883043
QIIME SortMeRna SUMACLUST	400(V4-V5)	Yes	MC	100000	family	SILVA	0.974464	0.974437	0.957899
QIIME SortMeRna SUMACLUST	400(V4-V5)	Yes	MC	100000	genus	SILVA	0.860622	0.86381	0.780553
QIIME SortMeRna SUMACLUST	400(V4-V5)	Yes	HC	25000	family	SILVA	0.93828	0.938144	0.90077
QIIME SortMeRna SUMACLUST	400(V4-V5)	Yes	HC	25000	genus	SILVA	0.889013	0.889305	0.820312
QIIME SortMeRna SUMACLUST	400(V4-V5)	Yes	HC	50000	family	SILVA	0.949384	0.949677	0.915341
QIIME SortMeRna SUMACLUST	400(V4-V5)	Yes	HC	50000	genus	SILVA	0.892588	0.894992	0.818488
QIIME SortMeRna SUMACLUST	400(V4-V5)	Yes	HC	100000	family	SILVA	0.952365	0.952716	0.921775
QIIME SortMeRna SUMACLUST	400(V4-V5)	Yes	HC	100000	genus	SILVA	0.887416	0.890472	0.812948
CLARK	200(V3)	No	LC	25000	family	RefSeq Bacteria	0.903084	0.905062	0.82792
CLARK	200(V3)	No	LC	25000	genus	RefSeq Bacteria	0.893677	0.895561	0.808397
CLARK	200(V3)	No	LC	50000	family	RefSeq Bacteria	0.902426	0.905367	0.82689
CLARK	200(V3)	No	LC	50000	genus	RefSeq Bacteria	0.89296	0.896556	0.807095
CLARK	200(V3)	No	LC	100000	family	RefSeq Bacteria	0.901545	0.904978	0.825549
CLARK	200(V3)	No	LC	100000	genus	RefSeq Bacteria	0.892216	0.896666	0.805896
CLARK	200(V3)	No	MC	25000	family	RefSeq Bacteria	0.879215	0.883058	0.786486
CLARK	200(V3)	No	MC	25000	genus	RefSeq Bacteria	0.814721	0.824489	0.687567
CLARK	200(V3)	No	MC	50000	family	RefSeq Bacteria	0.877914	0.88276	0.784585
CLARK	200(V3)	No	MC	50000	genus	RefSeq Bacteria	0.812717	0.824353	0.684715
CLARK	200(V3)	No	MC	100000	family	RefSeq Bacteria	0.878759	0.884187	0.785696
CLARK	200(V3)	No	MC	100000	genus	RefSeq Bacteria	0.813098	0.825886	0.685204
CLARK	200(V3)	No	HC	25000	family	RefSeq Bacteria	0.940444	0.940899	0.893582
CLARK	200(V3)	No	HC	25000	genus	RefSeq Bacteria	0.93507	0.935519	0.878717
CLARK	200(V3)	No	HC	50000	family	RefSeq Bacteria	0.938176	0.93915	0.88974
CLARK	200(V3)	No	HC	50000	genus	RefSeq Bacteria	0.932523	0.933875	0.874272
CLARK	200(V3)	No	HC	100000	family	RefSeq Bacteria	0.940375	0.94148	0.893382
CLARK	200(V3)	No	HC	100000	genus	RefSeq Bacteria	0.934772	0.936379	0.878184
CLARK	400(V4-V5)	No	LC	25000	family	RefSeq Bacteria	0.977202	0.977006	0.956956
CLARK	400(V4-V5)	No	LC	25000	genus	RefSeq Bacteria	0.979034	0.978602	0.958929
CLARK	400(V4-V5)	No	LC	50000	family	RefSeq Bacteria	0.977543	0.977563	0.957477
CLARK	400(V4-V5)	No	LC	50000	genus	RefSeq Bacteria	0.979353	0.979261	0.959542
CLARK	400(V4-V5)	No	LC	100000	family	RefSeq Bacteria	0.97667	0.976801	0.955952
CLARK	400(V4-V5)	No	LC	100000	genus	RefSeq Bacteria	0.978543	0.978619	0.957987
CLARK	400(V4-V5)	No	MC	25000	family	RefSeq Bacteria	0.98636	0.986184	0.973755
CLARK	400(V4-V5)	No	MC	25000	genus	RefSeq Bacteria	0.988447	0.988233	0.977158
CLARK	400(V4-V5)	No	MC	50000	family	RefSeq Bacteria	0.987915	0.987839	0.976827
CLARK	400(V4-V5)	No	MC	50000	genus	RefSeq Bacteria	0.989746	0.989636	0.979699
CLARK	400(V4-V5)	No	MC	100000	family	RefSeq Bacteria	0.987581	0.987567	0.976158
CLARK	400(V4-V5)	No	MC	100000	genus	RefSeq Bacteria	0.989478	0.989434	0.979175
CLARK	400(V4-V5)	No	HC	25000	family	RefSeq Bacteria	0.97462	0.97452	0.952245
CLARK	400(V4-V5)	No	HC	25000	genus	RefSeq Bacteria	0.97657	0.976258	0.954212
CLARK	400(V4-V5)	No	HC	50000	family	RefSeq Bacteria	0.975417	0.975499	0.953676
CLARK	400(V4-V5)	No	HC	50000	genus	RefSeq Bacteria	0.977344	0.977331	0.955692
CLARK	400(V4-V5)	No	HC	100000	family	RefSeq Bacteria	0.9752	0.975372	0.95332
CLARK	400(V4-V5)	No	HC	100000	genus	RefSeq Bacteria	0.977118	0.977245	0.95526
CLARK	200(V3)	Yes	LC	25000	family	RefSeq Bacteria	0.855568	0.855012	0.795097
CLARK	200(V3)	Yes	LC	25000	genus	RefSeq Bacteria	0.856362	0.854323	0.789432
CLARK	200(V3)	Yes	LC	50000	family	RefSeq Bacteria	0.85336	0.854273	0.792694
CLARK	200(V3)	Yes	LC	50000	genus	RefSeq Bacteria	0.854073	0.854475	0.786796
CLARK	200(V3)	Yes	LC	100000	family	RefSeq Bacteria	0.852468	0.854089	0.792054
CLARK	200(V3)	Yes	LC	100000	genus	RefSeq Bacteria	0.853357	0.854964	0.786583
CLARK	200(V3)	Yes	MC	25000	family	RefSeq Bacteria	0.789859	0.786526	0.746968
CLARK	200(V3)	Yes	MC	25000	genus	RefSeq Bacteria	0.746451	0.744475	0.665948
CLARK	200(V3)	Yes	MC	50000	family	RefSeq Bacteria	0.790401	0.789009	0.745833
CLARK	200(V3)	Yes	MC	50000	genus	RefSeq Bacteria	0.744795	0.745684	0.662615
CLARK	200(V3)	Yes	MC	100000	family	RefSeq Bacteria	0.788243	0.787919	0.744967
CLARK	200(V3)	Yes	MC	100000	genus	RefSeq Bacteria	0.743076	0.745619	0.662138
CLARK	200(V3)	Yes	HC	25000	family	RefSeq Bacteria	0.895907	0.895317	0.852286
CLARK	200(V3)	Yes	HC	25000	genus	RefSeq Bacteria	0.899019	0.897724	0.849069
CLARK	200(V3)	Yes	HC	50000	family	RefSeq Bacteria	0.893932	0.894181	0.849979
CLARK	200(V3)	Yes	HC	50000	genus	RefSeq Bacteria	0.897305	0.897316	0.847375
CLARK	200(V3)	Yes	HC	100000	family	RefSeq Bacteria	0.896751	0.897362	0.854172
CLARK	200(V3)	Yes	HC	100000	genus	RefSeq Bacteria	0.899766	0.900379	0.851431
CLARK	400(V4-V5)	Yes	LC	25000	family	RefSeq Bacteria	0.965934	0.965335	0.954746
CLARK	400(V4-V5)	Yes	LC	25000	genus	RefSeq Bacteria	0.969548	0.968606	0.95773
CLARK	400(V4-V5)	Yes	LC	50000	family	RefSeq Bacteria	0.965115	0.964851	0.953537
CLARK	400(V4-V5)	Yes	LC	50000	genus	RefSeq Bacteria	0.969102	0.96865	0.957807
CLARK	400(V4-V5)	Yes	LC	100000	family	RefSeq Bacteria	0.963951	0.963829	0.953035
CLARK	400(V4-V5)	Yes	LC	100000	genus	RefSeq Bacteria	0.967586	0.967345	0.957644
CLARK	400(V4-V5)	Yes	MC	25000	family	RefSeq Bacteria	0.976607	0.976161	0.971791
CLARK	400(V4-V5)	Yes	MC	25000	genus	RefSeq Bacteria	0.980072	0.979586	0.974465
CLARK	400(V4-V5)	Yes	MC	50000	family	RefSeq Bacteria	0.978185	0.977925	0.974886
CLARK	400(V4-V5)	Yes	MC	50000	genus	RefSeq Bacteria	0.981423	0.981119	0.977554
CLARK	400(V4-V5)	Yes	MC	100000	family	RefSeq Bacteria	0.977466	0.977317	0.973804
CLARK	400(V4-V5)	Yes	MC	100000	genus	RefSeq Bacteria	0.98042	0.980229	0.976302
CLARK	400(V4-V5)	Yes	HC	25000	family	RefSeq Bacteria	0.963994	0.963549	0.948748
CLARK	400(V4-V5)	Yes	HC	25000	genus	RefSeq Bacteria	0.967957	0.967171	0.954143
CLARK	400(V4-V5)	Yes	HC	50000	family	RefSeq Bacteria	0.963931	0.96373	0.950038
CLARK	400(V4-V5)	Yes	HC	50000	genus	RefSeq Bacteria	0.968158	0.967777	0.956018
CLARK	400(V4-V5)	Yes	HC	100000	family	RefSeq Bacteria	0.963624	0.963556	0.949843
CLARK	400(V4-V5)	Yes	HC	100000	genus	RefSeq Bacteria	0.967645	0.967454	0.955964

## Sheet: Richness & diversity indices (b
Pipeline	Amplicon / Dataset	Error simulation	Complexity	Throughput	Bank	CHAO1	Shannon	Inv Simpson
BMP	200(V3)	No	LC	25000	Greengenes	163	4.12957	15.8685
BMP	200(V3)	No	LC	50000	Greengenes	163	4.12425	15.8463
BMP	200(V3)	No	LC	100000	Greengenes	164	4.12695	15.6551
BMP	200(V3)	No	MC	25000	Greengenes	160	2.78967	7.98879
BMP	200(V3)	No	MC	50000	Greengenes	162	2.80186	7.98974
BMP	200(V3)	No	MC	100000	Greengenes	161	2.78131	7.91536
BMP	200(V3)	No	HC	25000	Greengenes	165	4.93145	107.05
BMP	200(V3)	No	HC	50000	Greengenes	165	4.92016	102.803
BMP	200(V3)	No	HC	100000	Greengenes	162	4.90248	102.473
BMP	400(V4-V5)	No	LC	25000	Greengenes	139	4.00367	16.4402
BMP	400(V4-V5)	No	LC	50000	Greengenes	138	4.01682	17.0734
BMP	400(V4-V5)	No	LC	100000	Greengenes	137	3.99371	16.5657
BMP	400(V4-V5)	No	MC	25000	Greengenes	140	2.89443	9.5422
BMP	400(V4-V5)	No	MC	50000	Greengenes	138	2.9006	9.64275
BMP	400(V4-V5)	No	MC	100000	Greengenes	138	2.89621	9.58363
BMP	400(V4-V5)	No	HC	25000	Greengenes	138	4.67887	75.5555
BMP	400(V4-V5)	No	HC	50000	Greengenes	137	4.6647	74.1764
BMP	400(V4-V5)	No	HC	100000	Greengenes	137	4.66637	73.946
BMP	200(V3)	Yes	LC	25000	Greengenes	1344	6.08675	141.852
BMP	200(V3)	Yes	LC	50000	Greengenes	2184	6.4769	243.06
BMP	200(V3)	Yes	LC	100000	Greengenes	3575	6.72932	251.198
BMP	200(V3)	Yes	MC	25000	Greengenes	731	5.49531	108.928
BMP	200(V3)	Yes	MC	50000	Greengenes	1066	5.74655	130.48
BMP	200(V3)	Yes	MC	100000	Greengenes	1676	6.02142	160.099
BMP	200(V3)	Yes	HC	25000	Greengenes	1580	6.31649	234.714
BMP	200(V3)	Yes	HC	50000	Greengenes	2780	6.6939	278.83
BMP	200(V3)	Yes	HC	100000	Greengenes	4731	7.0139	294.098
BMP	400(V4-V5)	Yes	LC	25000	Greengenes	1245	5.2713	28.7063
BMP	400(V4-V5)	Yes	LC	50000	Greengenes	1817	5.5108	32.6672
BMP	400(V4-V5)	Yes	LC	100000	Greengenes	2562	5.70971	37.7106
BMP	400(V4-V5)	Yes	MC	25000	Greengenes	880	4.56345	28.66
BMP	400(V4-V5)	Yes	MC	50000	Greengenes	1404	4.97836	31.7008
BMP	400(V4-V5)	Yes	MC	100000	Greengenes	2034	5.10183	30.1834
BMP	400(V4-V5)	Yes	HC	25000	Greengenes	1347	5.92944	62.9005
BMP	400(V4-V5)	Yes	HC	50000	Greengenes	1805	6.00566	65.3967
BMP	400(V4-V5)	Yes	HC	100000	Greengenes	2693	6.19813	68.7395
BMP	real				Greengenes	4792	6.28249	109.799
BMP	200(V3)	No	LC	25000	SILVA	163	4.12957	15.8685
BMP	200(V3)	No	LC	50000	SILVA	163	4.12425	15.8463
BMP	200(V3)	No	LC	100000	SILVA	164	4.12695	15.6551
BMP	200(V3)	No	MC	25000	SILVA	160	2.78967	7.98879
BMP	200(V3)	No	MC	50000	SILVA	162	2.80186	7.98974
BMP	200(V3)	No	MC	100000	SILVA	161	2.78131	7.91536
BMP	200(V3)	No	HC	25000	SILVA	165	4.93145	107.05
BMP	200(V3)	No	HC	50000	SILVA	165	4.92016	102.803
BMP	200(V3)	No	HC	100000	SILVA	162	4.90248	102.473
BMP	400(V4-V5)	No	LC	25000	SILVA	139	4.00367	16.4402
BMP	400(V4-V5)	No	LC	50000	SILVA	138	4.01682	17.0734
BMP	400(V4-V5)	No	LC	100000	SILVA	137	3.99371	16.5657
BMP	400(V4-V5)	No	MC	25000	SILVA	140	2.89443	9.5422
BMP	400(V4-V5)	No	MC	50000	SILVA	138	2.9006	9.64275
BMP	400(V4-V5)	No	MC	100000	SILVA	138	2.89621	9.58363
BMP	400(V4-V5)	No	HC	25000	SILVA	138	4.67887	75.5555
BMP	400(V4-V5)	No	HC	50000	SILVA	137	4.6647	74.1764
BMP	400(V4-V5)	No	HC	100000	SILVA	137	4.66637	73.946
BMP	200(V3)	Yes	LC	25000	SILVA	1344	6.08675	141.852
BMP	200(V3)	Yes	LC	50000	SILVA	2184	6.4769	243.06
BMP	200(V3)	Yes	LC	100000	SILVA	3575	6.72932	251.198
BMP	200(V3)	Yes	MC	25000	SILVA	731	5.49531	108.928
BMP	200(V3)	Yes	MC	50000	SILVA	1066	5.74655	130.48
BMP	200(V3)	Yes	MC	100000	SILVA	1676	6.02142	160.099
BMP	200(V3)	Yes	HC	25000	SILVA	1580	6.31649	234.714
BMP	200(V3)	Yes	HC	50000	SILVA	2780	6.6939	278.83
BMP	200(V3)	Yes	HC	100000	SILVA	4731	7.0139	294.098
BMP	400(V4-V5)	Yes	LC	25000	SILVA	1245	5.2713	28.7063
BMP	400(V4-V5)	Yes	LC	50000	SILVA	1817	5.5108	32.6672
BMP	400(V4-V5)	Yes	LC	100000	SILVA	2562	5.70971	37.7106
BMP	400(V4-V5)	Yes	MC	25000	SILVA	880	4.56345	28.66
BMP	400(V4-V5)	Yes	MC	50000	SILVA	1404	4.97836	31.7008
BMP	400(V4-V5)	Yes	MC	100000	SILVA	2034	5.10183	30.1834
BMP	400(V4-V5)	Yes	HC	25000	SILVA	1347	5.92944	62.9005
BMP	400(V4-V5)	Yes	HC	50000	SILVA	1805	6.00566	65.3967
BMP	400(V4-V5)	Yes	HC	100000	SILVA	2693	6.19813	68.7395
BMP	real				SILVA	4792	6.28249	109.799
mothur	200(V3)	No	LC	25000	SILVA	79	3.42609	7.92595
mothur	200(V3)	No	LC	50000	SILVA	79	3.42189	7.91932
mothur	200(V3)	No	LC	100000	SILVA	79	3.41782	7.81772
mothur	200(V3)	No	MC	25000	SILVA	79	2.10112	3.99518
mothur	200(V3)	No	MC	50000	SILVA	79	2.1076	3.99517
mothur	200(V3)	No	MC	100000	SILVA	79	2.09085	3.95806
mothur	200(V3)	No	HC	25000	SILVA	79	4.21	52.4081
mothur	200(V3)	No	HC	50000	SILVA	79	4.1986	50.3965
mothur	200(V3)	No	HC	100000	SILVA	79	4.2066	51.5745
mothur	400(V4-V5)	No	LC	25000	SILVA	64	3.15078	6.90421
mothur	400(V4-V5)	No	LC	50000	SILVA	64	3.16289	7.076
mothur	400(V4-V5)	No	LC	100000	SILVA	64	3.15227	6.95527
mothur	400(V4-V5)	No	MC	25000	SILVA	64	1.97731	3.83862
mothur	400(V4-V5)	No	MC	50000	SILVA	64	1.98681	3.8715
mothur	400(V4-V5)	No	MC	100000	SILVA	64	1.98266	3.84141
mothur	400(V4-V5)	No	HC	25000	SILVA	64	3.90168	34.7212
mothur	400(V4-V5)	No	HC	50000	SILVA	64	3.89712	34.3785
mothur	400(V4-V5)	No	HC	100000	SILVA	64	3.89846	34.3705
mothur	200(V3)	Yes	LC	25000	SILVA	1189	4.84285	15.9781
mothur	200(V3)	Yes	LC	50000	SILVA	2111	4.94189	16.753
mothur	200(V3)	Yes	LC	100000	SILVA	3691	5.08398	17.1794
mothur	200(V3)	Yes	MC	25000	SILVA	756	3.95801	14.1193
mothur	200(V3)	Yes	MC	50000	SILVA	1167	3.86103	12.1347
mothur	200(V3)	Yes	MC	100000	SILVA	1914	4.01727	13.2642
mothur	200(V3)	Yes	HC	25000	SILVA	1395	5.60676	118.602
mothur	200(V3)	Yes	HC	50000	SILVA	2655	5.83563	125.667
mothur	200(V3)	Yes	HC	100000	SILVA	4662	5.98893	130.346
mothur	400(V4-V5)	Yes	LC	25000	SILVA	2025	5.68601	24.1734
mothur	400(V4-V5)	Yes	LC	50000	SILVA	3973	6.0239	27.2952
mothur	400(V4-V5)	Yes	LC	100000	SILVA	7745	6.33265	25.8582
mothur	400(V4-V5)	Yes	MC	25000	SILVA	2145	5.38944	22.2831
mothur	400(V4-V5)	Yes	MC	50000	SILVA	3938	5.71112	25.1455
mothur	400(V4-V5)	Yes	MC	100000	SILVA	7462	5.96129	25.204
mothur	400(V4-V5)	Yes	HC	25000	SILVA	2091	6.15215	146.241
mothur	400(V4-V5)	Yes	HC	50000	SILVA	4164	6.54818	164.062
mothur	400(V4-V5)	Yes	HC	100000	SILVA	7858	6.82025	170.164
mothur	real				SILVA	4251	4.72219	23.4734
mothur	200(V3)	No	LC	25000	Greengenes	85	3.46051	7.95089
mothur	200(V3)	No	LC	50000	Greengenes	85	3.45782	7.94533
mothur	200(V3)	No	LC	100000	Greengenes	85	3.45215	7.84132
mothur	200(V3)	No	MC	25000	Greengenes	85	2.1108	3.99564
mothur	200(V3)	No	MC	50000	Greengenes	85	2.11802	3.99574
mothur	200(V3)	No	MC	100000	Greengenes	85	2.10062	3.95854
mothur	200(V3)	No	HC	25000	Greengenes	85	4.25892	54.632
mothur	200(V3)	No	HC	50000	Greengenes	85	4.24908	52.5183
mothur	200(V3)	No	HC	100000	Greengenes	85	4.25613	53.7447
mothur	400(V4-V5)	No	LC	25000	Greengenes	66	3.18371	6.93809
mothur	400(V4-V5)	No	LC	50000	Greengenes	66	3.19614	7.11253
mothur	400(V4-V5)	No	LC	100000	Greengenes	66	3.18628	6.99173
mothur	400(V4-V5)	No	MC	25000	Greengenes	66	1.98776	3.83969
mothur	400(V4-V5)	No	MC	50000	Greengenes	66	1.99659	3.87248
mothur	400(V4-V5)	No	MC	100000	Greengenes	66	1.9916	3.84222
mothur	400(V4-V5)	No	HC	25000	Greengenes	66	3.94963	36.6471
mothur	400(V4-V5)	No	HC	50000	Greengenes	66	3.94838	36.5463
mothur	400(V4-V5)	No	HC	100000	Greengenes	66	3.94653	36.2701
mothur	200(V3)	Yes	LC	25000	Greengenes	1557	5.28392	23.8054
mothur	200(V3)	Yes	LC	50000	Greengenes	2689	5.45655	24.3452
mothur	200(V3)	Yes	LC	100000	Greengenes	4588	5.58597	24.6178
mothur	200(V3)	Yes	MC	25000	Greengenes	927	4.25924	18.3544
mothur	200(V3)	Yes	MC	50000	Greengenes	1373	4.27072	17.7947
mothur	200(V3)	Yes	MC	100000	Greengenes	2409	4.4053	18.4412
mothur	200(V3)	Yes	HC	25000	Greengenes	1814	6.15606	183.645
mothur	200(V3)	Yes	HC	50000	Greengenes	3262	6.42177	198.523
mothur	200(V3)	Yes	HC	100000	Greengenes	5838	6.6467	208.193
mothur	400(V4-V5)	Yes	LC	25000	Greengenes	2177	6.15492	43.1491
mothur	400(V4-V5)	Yes	LC	50000	Greengenes	4176	6.52976	51.1845
mothur	400(V4-V5)	Yes	LC	100000	Greengenes	8286	6.98429	62.8361
mothur	400(V4-V5)	Yes	MC	25000	Greengenes	2334	5.95497	39.4761
mothur	400(V4-V5)	Yes	MC	50000	Greengenes	4361	6.3422	45.1621
mothur	400(V4-V5)	Yes	MC	100000	Greengenes	8275	6.63634	45.8387
mothur	400(V4-V5)	Yes	HC	25000	Greengenes	2179	6.51174	201.431
mothur	400(V4-V5)	Yes	HC	50000	Greengenes	4372	6.99974	253.48
mothur	400(V4-V5)	Yes	HC	100000	Greengenes	8516	7.35613	270.711
mothur	real				Greengenes	4800	5.06647	34.6935
QIIME UCLUST	200(V3)	Yes	LC	25000	Greengenes	969	5.2276	53.7704
QIIME UCLUST	200(V3)	Yes	LC	50000	Greengenes	1370	5.28094	55.5989
QIIME UCLUST	200(V3)	Yes	LC	100000	Greengenes	2122	5.33355	53.8762
QIIME UCLUST	200(V3)	Yes	MC	25000	Greengenes	470	3.63171	12.911
QIIME UCLUST	200(V3)	Yes	MC	50000	Greengenes	713	3.69585	12.9083
QIIME UCLUST	200(V3)	Yes	MC	100000	Greengenes	1096	3.76859	13.1519
QIIME UCLUST	200(V3)	Yes	HC	25000	Greengenes	1140	5.67676	149.274
QIIME UCLUST	200(V3)	Yes	HC	50000	Greengenes	1780	5.76327	151.729
QIIME UCLUST	200(V3)	Yes	HC	100000	Greengenes	2764	5.81555	154.11
QIIME UCLUST	200(V3)	No	LC	25000	Greengenes	126	3.91601	15.9066
QIIME UCLUST	200(V3)	No	LC	50000	Greengenes	126	3.91529	15.843
QIIME UCLUST	200(V3)	No	LC	100000	Greengenes	126	3.91349	15.6931
QIIME UCLUST	200(V3)	No	MC	25000	Greengenes	125	2.87128	9.69398
QIIME UCLUST	200(V3)	No	MC	50000	Greengenes	126	2.87824	9.66128
QIIME UCLUST	200(V3)	No	MC	100000	Greengenes	126	2.86398	9.59148
QIIME UCLUST	200(V3)	No	HC	25000	Greengenes	126	4.59479	75.9028
QIIME UCLUST	200(V3)	No	HC	50000	Greengenes	126	4.58664	73.0637
QIIME UCLUST	200(V3)	No	HC	100000	Greengenes	126	4.59245	74.8814
QIIME UCLUST	400(V4-V5)	Yes	LC	25000	Greengenes	1365	5.65491	52.1061
QIIME UCLUST	400(V4-V5)	Yes	LC	50000	Greengenes	2328	5.84517	52.5472
QIIME UCLUST	400(V4-V5)	Yes	LC	100000	Greengenes	3887	5.94657	51.5541
QIIME UCLUST	400(V4-V5)	Yes	MC	25000	Greengenes	1039	4.06975	13.3308
QIIME UCLUST	400(V4-V5)	Yes	MC	50000	Greengenes	1708	4.22358	13.6767
QIIME UCLUST	400(V4-V5)	Yes	MC	100000	Greengenes	3149	4.39415	13.8954
QIIME UCLUST	400(V4-V5)	Yes	HC	25000	Greengenes	1410	6.06735	193.36
QIIME UCLUST	400(V4-V5)	Yes	HC	50000	Greengenes	2305	6.22455	197.466
QIIME UCLUST	400(V4-V5)	Yes	HC	100000	Greengenes	3739	6.34257	199.362
QIIME UCLUST	400(V4-V5)	No	LC	25000	Greengenes	139	4.05809	17.6078
QIIME UCLUST	400(V4-V5)	No	LC	50000	Greengenes	139	4.07092	18.1483
QIIME UCLUST	400(V4-V5)	No	LC	100000	Greengenes	139	4.05872	17.6691
QIIME UCLUST	400(V4-V5)	No	MC	25000	Greengenes	139	2.90513	9.65755
QIIME UCLUST	400(V4-V5)	No	MC	50000	Greengenes	138	2.91332	9.70412
QIIME UCLUST	400(V4-V5)	No	MC	100000	Greengenes	139	2.91165	9.74873
QIIME UCLUST	400(V4-V5)	No	HC	25000	Greengenes	139	4.72101	83.2153
QIIME UCLUST	400(V4-V5)	No	HC	50000	Greengenes	139	4.72729	83.78
QIIME UCLUST	400(V4-V5)	No	HC	100000	Greengenes	139	4.72498	82.7996
QIIME UCLUST	real				Greengenes	11153	6.56037	140.991
QIIME UCLUST	200(V3)	Yes	LC	25000	SILVA	984	5.22939	60.5848
QIIME UCLUST	200(V3)	Yes	LC	50000	SILVA	1554	5.3515	63.6562
QIIME UCLUST	200(V3)	Yes	LC	100000	SILVA	2309	5.40438	64.2089
QIIME UCLUST	200(V3)	Yes	MC	25000	SILVA	560	4.08965	21.0764
QIIME UCLUST	200(V3)	Yes	MC	50000	SILVA	813	4.13872	21.2579
QIIME UCLUST	200(V3)	Yes	MC	100000	SILVA	1196	4.17897	21.1447
QIIME UCLUST	200(V3)	Yes	HC	25000	SILVA	1241	5.7007	143.503
QIIME UCLUST	200(V3)	Yes	HC	50000	SILVA	2016	5.84192	149.941
QIIME UCLUST	200(V3)	Yes	HC	100000	SILVA	3267	5.93388	153.337
QIIME UCLUST	200(V3)	No	LC	25000	SILVA	124	3.69479	8.37259
QIIME UCLUST	200(V3)	No	LC	50000	SILVA	124	3.69657	8.36244
QIIME UCLUST	200(V3)	No	LC	100000	SILVA	124	3.69153	8.258
QIIME UCLUST	200(V3)	No	MC	25000	SILVA	123	2.7277	7.97477
QIIME UCLUST	200(V3)	No	MC	50000	SILVA	124	2.73777	7.97939
QIIME UCLUST	200(V3)	No	MC	100000	SILVA	124	2.72063	7.90404
QIIME UCLUST	200(V3)	No	HC	25000	SILVA	124	4.57765	72.9655
QIIME UCLUST	200(V3)	No	HC	50000	SILVA	124	4.57038	70.4978
QIIME UCLUST	200(V3)	No	HC	100000	SILVA	124	4.57528	72.0618
QIIME UCLUST	400(V4-V5)	Yes	LC	25000	SILVA	1340	5.3802	35.7861
QIIME UCLUST	400(V4-V5)	Yes	LC	50000	SILVA	2154	5.5411	38.8287
QIIME UCLUST	400(V4-V5)	Yes	LC	100000	SILVA	3474	5.59204	37.5274
QIIME UCLUST	400(V4-V5)	Yes	MC	25000	SILVA	979	3.79293	9.98967
QIIME UCLUST	400(V4-V5)	Yes	MC	50000	SILVA	1594	3.92872	10.1626
QIIME UCLUST	400(V4-V5)	Yes	MC	100000	SILVA	2846	4.07266	10.39
QIIME UCLUST	400(V4-V5)	Yes	HC	25000	SILVA	1395	5.92432	153.537
QIIME UCLUST	400(V4-V5)	Yes	HC	50000	SILVA	2326	6.1036	156.415
QIIME UCLUST	400(V4-V5)	Yes	HC	100000	SILVA	3776	6.20393	160.538
QIIME UCLUST	400(V4-V5)	No	LC	25000	SILVA	130	4.02694	18.2366
QIIME UCLUST	400(V4-V5)	No	LC	50000	SILVA	130	4.04348	18.8483
QIIME UCLUST	400(V4-V5)	No	LC	100000	SILVA	130	4.02914	18.2989
QIIME UCLUST	400(V4-V5)	No	MC	25000	SILVA	130	2.62447	6.93715
QIIME UCLUST	400(V4-V5)	No	MC	50000	SILVA	130	2.63747	6.9714
QIIME UCLUST	400(V4-V5)	No	MC	100000	SILVA	130	2.63327	6.96955
QIIME UCLUST	400(V4-V5)	No	HC	25000	SILVA	130	4.65771	82.4207
QIIME UCLUST	400(V4-V5)	No	HC	50000	SILVA	130	4.65579	82.0038
QIIME UCLUST	400(V4-V5)	No	HC	100000	SILVA	130	4.66016	82.5841
QIIME UCLUST	real				SILVA	11447	6.60633	134.937
QIIME SortMeRna SUMACLUST	200(V3)	Yes	LC	25000	Greengenes	576	4.4925	12.994
QIIME SortMeRna SUMACLUST	200(V3)	Yes	LC	50000	Greengenes	773	4.4992	12.9524
QIIME SortMeRna SUMACLUST	200(V3)	Yes	LC	100000	Greengenes	1073	4.45537	12.7406
QIIME SortMeRna SUMACLUST	200(V3)	Yes	MC	25000	Greengenes	355	3.00656	7.82463
QIIME SortMeRna SUMACLUST	200(V3)	Yes	MC	50000	Greengenes	422	2.99437	7.90991
QIIME SortMeRna SUMACLUST	200(V3)	Yes	MC	100000	Greengenes	642	3.00404	7.90084
QIIME SortMeRna SUMACLUST	200(V3)	Yes	HC	25000	Greengenes	696	5.37085	130.312
QIIME SortMeRna SUMACLUST	200(V3)	Yes	HC	50000	Greengenes	885	5.36856	129.338
QIIME SortMeRna SUMACLUST	200(V3)	Yes	HC	100000	Greengenes	1256	5.35865	129.095
QIIME SortMeRna SUMACLUST	200(V3)	No	LC	25000	Greengenes	94	3.61621	9.32687
QIIME SortMeRna SUMACLUST	200(V3)	No	LC	50000	Greengenes	94	3.61011	9.27373
QIIME SortMeRna SUMACLUST	200(V3)	No	LC	100000	Greengenes	94	3.60849	9.17772
QIIME SortMeRna SUMACLUST	200(V3)	No	MC	25000	Greengenes	93	2.43004	6.05774
QIIME SortMeRna SUMACLUST	200(V3)	No	MC	50000	Greengenes	94	2.44194	6.09828
QIIME SortMeRna SUMACLUST	200(V3)	No	MC	100000	Greengenes	94	2.42473	6.03915
QIIME SortMeRna SUMACLUST	200(V3)	No	HC	25000	Greengenes	94	4.38808	67.786
QIIME SortMeRna SUMACLUST	200(V3)	No	HC	50000	Greengenes	94	4.3805	66.0596
QIIME SortMeRna SUMACLUST	200(V3)	No	HC	100000	Greengenes	94	4.38678	67.1078
QIIME SortMeRna SUMACLUST	400(V4-V5)	Yes	LC	25000	Greengenes	574	4.73996	29.5823
QIIME SortMeRna SUMACLUST	400(V4-V5)	Yes	LC	50000	Greengenes	745	4.68044	25.7835
QIIME SortMeRna SUMACLUST	400(V4-V5)	Yes	LC	100000	Greengenes	1170	4.80115	26.8434
QIIME SortMeRna SUMACLUST	400(V4-V5)	Yes	MC	25000	Greengenes	473	3.63019	11.9477
QIIME SortMeRna SUMACLUST	400(V4-V5)	Yes	MC	50000	Greengenes	652	3.57838	11.5344
QIIME SortMeRna SUMACLUST	400(V4-V5)	Yes	MC	100000	Greengenes	950	3.6159	11.6951
QIIME SortMeRna SUMACLUST	400(V4-V5)	Yes	HC	25000	Greengenes	580	5.37432	134.4
QIIME SortMeRna SUMACLUST	400(V4-V5)	Yes	HC	50000	Greengenes	832	5.43128	138.526
QIIME SortMeRna SUMACLUST	400(V4-V5)	Yes	HC	100000	Greengenes	1144	5.44792	135.859
QIIME SortMeRna SUMACLUST	400(V4-V5)	No	LC	25000	Greengenes	86	3.57221	9.00358
QIIME SortMeRna SUMACLUST	400(V4-V5)	No	LC	50000	Greengenes	86	3.59061	9.31103
QIIME SortMeRna SUMACLUST	400(V4-V5)	No	LC	100000	Greengenes	86	3.57243	9.04274
QIIME SortMeRna SUMACLUST	400(V4-V5)	No	MC	25000	Greengenes	86	2.415	6.03472
QIIME SortMeRna SUMACLUST	400(V4-V5)	No	MC	50000	Greengenes	86	2.4259	6.07149
QIIME SortMeRna SUMACLUST	400(V4-V5)	No	MC	100000	Greengenes	86	2.42181	6.05555
QIIME SortMeRna SUMACLUST	400(V4-V5)	No	HC	25000	Greengenes	86	4.33652	66.259
QIIME SortMeRna SUMACLUST	400(V4-V5)	No	HC	50000	Greengenes	86	4.33877	66.3572
QIIME SortMeRna SUMACLUST	400(V4-V5)	No	HC	100000	Greengenes	86	4.33951	66.3671
QIIME SortMeRna SUMACLUST	real				Greengenes	4154	5.44334	60.6624
QIIME SortMeRna SUMACLUST	200(V3)	Yes	LC	25000	SILVA	604	4.70265	18.7665
QIIME SortMeRna SUMACLUST	200(V3)	Yes	LC	50000	SILVA	820	4.74059	19.194
QIIME SortMeRna SUMACLUST	200(V3)	Yes	LC	100000	SILVA	1094	4.68002	18.5054
QIIME SortMeRna SUMACLUST	200(V3)	Yes	MC	25000	SILVA	367	3.35663	10.9067
QIIME SortMeRna SUMACLUST	200(V3)	Yes	MC	50000	SILVA	446	3.35421	10.9
QIIME SortMeRna SUMACLUST	200(V3)	Yes	MC	100000	SILVA	622	3.36057	10.9642
QIIME SortMeRna SUMACLUST	200(V3)	Yes	HC	25000	SILVA	752	5.44874	139.424
QIIME SortMeRna SUMACLUST	200(V3)	Yes	HC	50000	SILVA	985	5.45122	137.848
QIIME SortMeRna SUMACLUST	200(V3)	Yes	HC	100000	SILVA	1384	5.45511	138.994
QIIME SortMeRna SUMACLUST	200(V3)	No	LC	25000	SILVA	100	3.65022	9.36147
QIIME SortMeRna SUMACLUST	200(V3)	No	LC	50000	SILVA	100	3.6442	9.31384
QIIME SortMeRna SUMACLUST	200(V3)	No	LC	100000	SILVA	100	3.64152	9.21378
QIIME SortMeRna SUMACLUST	200(V3)	No	MC	25000	SILVA	100	2.44981	6.09118
QIIME SortMeRna SUMACLUST	200(V3)	No	MC	50000	SILVA	100	2.45821	6.12784
QIIME SortMeRna SUMACLUST	200(V3)	No	MC	100000	SILVA	100	2.44331	6.07335
QIIME SortMeRna SUMACLUST	200(V3)	No	HC	25000	SILVA	100	4.43631	71.866
QIIME SortMeRna SUMACLUST	200(V3)	No	HC	50000	SILVA	100	4.43015	70.4933
QIIME SortMeRna SUMACLUST	200(V3)	No	HC	100000	SILVA	100	4.43479	71.3678
QIIME SortMeRna SUMACLUST	400(V4-V5)	Yes	LC	25000	SILVA	623	4.49822	11.3825
QIIME SortMeRna SUMACLUST	400(V4-V5)	Yes	LC	50000	SILVA	816	4.56049	11.9755
QIIME SortMeRna SUMACLUST	400(V4-V5)	Yes	LC	100000	SILVA	1284	4.66979	11.6549
QIIME SortMeRna SUMACLUST	400(V4-V5)	Yes	MC	25000	SILVA	494	3.45602	9.67341
QIIME SortMeRna SUMACLUST	400(V4-V5)	Yes	MC	50000	SILVA	660	3.39452	9.68146
QIIME SortMeRna SUMACLUST	400(V4-V5)	Yes	MC	100000	SILVA	971	3.49133	9.82062
QIIME SortMeRna SUMACLUST	400(V4-V5)	Yes	HC	25000	SILVA	621	5.42889	141.548
QIIME SortMeRna SUMACLUST	400(V4-V5)	Yes	HC	50000	SILVA	872	5.49487	149.298
QIIME SortMeRna SUMACLUST	400(V4-V5)	Yes	HC	100000	SILVA	1244	5.52194	146.483
QIIME SortMeRna SUMACLUST	400(V4-V5)	No	LC	25000	SILVA	94	3.65624	9.76129
QIIME SortMeRna SUMACLUST	400(V4-V5)	No	LC	50000	SILVA	94	3.67402	10.1019
QIIME SortMeRna SUMACLUST	400(V4-V5)	No	LC	100000	SILVA	94	3.65471	9.76782
QIIME SortMeRna SUMACLUST	400(V4-V5)	No	MC	25000	SILVA	94	2.43613	6.06625
QIIME SortMeRna SUMACLUST	400(V4-V5)	No	MC	50000	SILVA	94	2.44811	6.11039
QIIME SortMeRna SUMACLUST	400(V4-V5)	No	MC	100000	SILVA	94	2.44331	6.08934
QIIME SortMeRna SUMACLUST	400(V4-V5)	No	HC	25000	SILVA	94	4.40017	69.7111
QIIME SortMeRna SUMACLUST	400(V4-V5)	No	HC	50000	SILVA	94	4.40254	69.6055
QIIME SortMeRna SUMACLUST	400(V4-V5)	No	HC	100000	SILVA	94	4.40473	69.9266
QIIME SortMeRna SUMACLUST	real				SILVA	4390	5.52903	63.9501

## Sheet: Richness & diversity indices (a
Pipeline	Amplicon / Dataset	Error simulation	Complexity	Throughput	Rank	Bank	CHAO1	Shannon	Inv Simpson
BMP	200(V3)	No	LC	25000	family	Greengenes	55	3.09434	7.48619
BMP	200(V3)	No	LC	25000	genus	Greengenes	74	3.25825	7.60308
BMP	200(V3)	No	LC	50000	family	Greengenes	55	3.09714	7.47441
BMP	200(V3)	No	LC	50000	genus	Greengenes	74	3.26018	7.58747
BMP	200(V3)	No	LC	100000	family	Greengenes	54	3.0873	7.42789
BMP	200(V3)	No	LC	100000	genus	Greengenes	73	3.25949	7.55005
BMP	200(V3)	No	MC	25000	family	Greengenes	54	1.98934	3.95183
BMP	200(V3)	No	MC	25000	genus	Greengenes	73	2.03617	3.95446
BMP	200(V3)	No	MC	50000	family	Greengenes	53	1.99091	3.95046
BMP	200(V3)	No	MC	50000	genus	Greengenes	72	2.04172	3.95343
BMP	200(V3)	No	MC	100000	family	Greengenes	52	1.97372	3.91361
BMP	200(V3)	No	MC	100000	genus	Greengenes	71	2.02131	3.91626
BMP	200(V3)	No	HC	25000	family	Greengenes	55	3.75726	33.6728
BMP	200(V3)	No	HC	25000	genus	Greengenes	74	4.00293	39.7908
BMP	200(V3)	No	HC	50000	family	Greengenes	54	3.7258	32.3535
BMP	200(V3)	No	HC	50000	genus	Greengenes	73	3.97105	37.9645
BMP	200(V3)	No	HC	100000	family	Greengenes	53	3.73024	32.8482
BMP	200(V3)	No	HC	100000	genus	Greengenes	72	3.97386	38.3845
BMP	400(V4-V5)	No	LC	25000	family	Greengenes	54	3.07119	7.52707
BMP	400(V4-V5)	No	LC	25000	genus	Greengenes	70	3.27393	8.14238
BMP	400(V4-V5)	No	LC	50000	family	Greengenes	53	3.06867	7.64574
BMP	400(V4-V5)	No	LC	50000	genus	Greengenes	68	3.28041	8.3927
BMP	400(V4-V5)	No	LC	100000	family	Greengenes	53	3.0514	7.43811
BMP	400(V4-V5)	No	LC	100000	genus	Greengenes	68	3.24725	8.08221
BMP	400(V4-V5)	No	MC	25000	family	Greengenes	54	1.99613	3.97015
BMP	400(V4-V5)	No	MC	25000	genus	Greengenes	69	2.26517	5.30227
BMP	400(V4-V5)	No	MC	50000	family	Greengenes	54	2.00592	4.00244
BMP	400(V4-V5)	No	MC	50000	genus	Greengenes	68	2.27406	5.34411
BMP	400(V4-V5)	No	MC	100000	family	Greengenes	53	1.99698	3.96685
BMP	400(V4-V5)	No	MC	100000	genus	Greengenes	68	2.27103	5.31432
BMP	400(V4-V5)	No	HC	25000	family	Greengenes	54	3.69337	29.5056
BMP	400(V4-V5)	No	HC	25000	genus	Greengenes	69	3.94005	35.7842
BMP	400(V4-V5)	No	HC	50000	family	Greengenes	53	3.67542	28.9765
BMP	400(V4-V5)	No	HC	50000	genus	Greengenes	67	3.90738	34.7015
BMP	400(V4-V5)	No	HC	100000	family	Greengenes	53	3.6771	28.9236
BMP	400(V4-V5)	No	HC	100000	genus	Greengenes	68	3.91439	34.641
BMP	200(V3)	Yes	LC	25000	family	Greengenes	69	3.12955	7.53947
BMP	200(V3)	Yes	LC	25000	genus	Greengenes	107	3.63511	15.4474
BMP	200(V3)	Yes	LC	50000	family	Greengenes	67	3.13973	7.69985
BMP	200(V3)	Yes	LC	50000	genus	Greengenes	106	3.64789	16.1128
BMP	200(V3)	Yes	LC	100000	family	Greengenes	69	3.24222	9.16736
BMP	200(V3)	Yes	LC	100000	genus	Greengenes	108	3.70886	17.9937
BMP	200(V3)	Yes	MC	25000	family	Greengenes	62	2.05828	4.14037
BMP	200(V3)	Yes	MC	25000	genus	Greengenes	87	2.498	6.64385
BMP	200(V3)	Yes	MC	50000	family	Greengenes	66	2.01764	3.99736
BMP	200(V3)	Yes	MC	50000	genus	Greengenes	94	2.44372	6.12545
BMP	200(V3)	Yes	MC	100000	family	Greengenes	62	2.01151	3.97562
BMP	200(V3)	Yes	MC	100000	genus	Greengenes	87	2.44592	6.25835
BMP	200(V3)	Yes	HC	25000	family	Greengenes	73	3.81973	34.7105
BMP	200(V3)	Yes	HC	25000	genus	Greengenes	108	4.14237	45.1214
BMP	200(V3)	Yes	HC	50000	family	Greengenes	73	3.80679	33.477
BMP	200(V3)	Yes	HC	50000	genus	Greengenes	109	4.1343	43.4741
BMP	200(V3)	Yes	HC	100000	family	Greengenes	81	3.81428	33.8634
BMP	200(V3)	Yes	HC	100000	genus	Greengenes	126	4.16814	44.9243
BMP	400(V4-V5)	Yes	LC	25000	family	Greengenes	58	3.01409	6.68537
BMP	400(V4-V5)	Yes	LC	25000	genus	Greengenes	94	3.36366	8.57356
BMP	400(V4-V5)	Yes	LC	50000	family	Greengenes	60	3.05877	7.20421
BMP	400(V4-V5)	Yes	LC	50000	genus	Greengenes	97	3.45938	10.3866
BMP	400(V4-V5)	Yes	LC	100000	family	Greengenes	59	3.09634	7.56376
BMP	400(V4-V5)	Yes	LC	100000	genus	Greengenes	101	3.52661	11.4693
BMP	400(V4-V5)	Yes	MC	25000	family	Greengenes	58	1.86499	3.71491
BMP	400(V4-V5)	Yes	MC	25000	genus	Greengenes	90	2.25478	5.12129
BMP	400(V4-V5)	Yes	MC	50000	family	Greengenes	56	1.90884	3.82317
BMP	400(V4-V5)	Yes	MC	50000	genus	Greengenes	89	2.2518	4.72784
BMP	400(V4-V5)	Yes	MC	100000	family	Greengenes	57	1.95239	3.90454
BMP	400(V4-V5)	Yes	MC	100000	genus	Greengenes	96	2.36137	5.17968
BMP	400(V4-V5)	Yes	HC	25000	family	Greengenes	60	3.73908	31.9459
BMP	400(V4-V5)	Yes	HC	25000	genus	Greengenes	99	4.07333	42.313
BMP	400(V4-V5)	Yes	HC	50000	family	Greengenes	63	3.72146	31.6973
BMP	400(V4-V5)	Yes	HC	50000	genus	Greengenes	97	4.02382	39.806
BMP	400(V4-V5)	Yes	HC	100000	family	Greengenes	60	3.72806	32.1494
BMP	400(V4-V5)	Yes	HC	100000	genus	Greengenes	98	4.06187	41.6338
BMP	real				family	Greengenes	43	1.85812	4.44852
BMP	real				genus	Greengenes	73	2.49445	7.58424
BMP	200(V3)	No	LC	25000	family	SILVA	62	3.10295	7.38052
BMP	200(V3)	No	LC	25000	genus	SILVA	82	3.25678	7.47831
BMP	200(V3)	No	LC	50000	family	SILVA	62	3.10335	7.35067
BMP	200(V3)	No	LC	50000	genus	SILVA	81	3.4792	13.5063
BMP	200(V3)	No	LC	100000	family	SILVA	61	3.11028	7.35997
BMP	200(V3)	No	LC	100000	genus	SILVA	80	3.26099	7.4486
BMP	200(V3)	No	MC	25000	family	SILVA	62	1.99768	3.94592
BMP	200(V3)	No	MC	25000	genus	SILVA	83	2.32461	5.89691
BMP	200(V3)	No	MC	50000	family	SILVA	60	1.99823	3.94918
BMP	200(V3)	No	MC	50000	genus	SILVA	79	2.32431	5.93317
BMP	200(V3)	No	MC	100000	family	SILVA	61	1.98595	3.91232
BMP	200(V3)	No	MC	100000	genus	SILVA	81	2.31434	5.87967
BMP	200(V3)	No	HC	25000	family	SILVA	60	3.73979	28.8133
BMP	200(V3)	No	HC	25000	genus	SILVA	83	4.02907	34.916
BMP	200(V3)	No	HC	50000	family	SILVA	63	3.7806	30.0243
BMP	200(V3)	No	HC	50000	genus	SILVA	82	4.04097	36.6444
BMP	200(V3)	No	HC	100000	family	SILVA	59	3.7413	29.3312
BMP	200(V3)	No	HC	100000	genus	SILVA	79	3.99839	35.0991
BMP	400(V4-V5)	No	LC	25000	family	SILVA	55	3.0798	7.52658
BMP	400(V4-V5)	No	LC	25000	genus	SILVA	76	3.52814	14.7471
BMP	400(V4-V5)	No	LC	50000	family	SILVA	55	3.08983	7.66058
BMP	400(V4-V5)	No	LC	50000	genus	SILVA	75	3.53689	15.1281
BMP	400(V4-V5)	No	LC	100000	family	SILVA	55	3.07331	7.45256
BMP	400(V4-V5)	No	LC	100000	genus	SILVA	76	3.52152	14.667
BMP	400(V4-V5)	No	MC	25000	family	SILVA	56	2.0021	3.97047
BMP	400(V4-V5)	No	MC	25000	genus	SILVA	77	2.28229	5.30348
BMP	400(V4-V5)	No	MC	50000	family	SILVA	56	2.01251	4.00282
BMP	400(V4-V5)	No	MC	50000	genus	SILVA	76	2.48126	6.85837
BMP	400(V4-V5)	No	MC	100000	family	SILVA	55	1.99568	3.95378
BMP	400(V4-V5)	No	MC	100000	genus	SILVA	76	2.47302	6.84623
BMP	400(V4-V5)	No	HC	25000	family	SILVA	56	3.72058	29.8318
BMP	400(V4-V5)	No	HC	25000	genus	SILVA	75	4.00712	37.2987
BMP	400(V4-V5)	No	HC	50000	family	SILVA	55	3.71093	29.5543
BMP	400(V4-V5)	No	HC	50000	genus	SILVA	74	3.99212	36.6467
BMP	400(V4-V5)	No	HC	100000	family	SILVA	55	3.70743	29.3549
BMP	400(V4-V5)	No	HC	100000	genus	SILVA	75	4.00047	36.6329
BMP	200(V3)	Yes	LC	25000	family	SILVA	106	3.22963	8.09124
BMP	200(V3)	Yes	LC	25000	genus	SILVA	270	4.31789	32.1381
BMP	200(V3)	Yes	LC	50000	family	SILVA	125	3.31932	8.95125
BMP	200(V3)	Yes	LC	50000	genus	SILVA	358	4.42277	37.8255
BMP	200(V3)	Yes	LC	100000	family	SILVA	168	3.33945	9.01887
BMP	200(V3)	Yes	LC	100000	genus	SILVA	475	4.34564	25.3659
BMP	200(V3)	Yes	MC	25000	family	SILVA	78	2.06764	4.14986
BMP	200(V3)	Yes	MC	25000	genus	SILVA	145	2.7206	6.54017
BMP	200(V3)	Yes	MC	50000	family	SILVA	80	2.03203	4.03203
BMP	200(V3)	Yes	MC	50000	genus	SILVA	163	2.69117	6.30334
BMP	200(V3)	Yes	MC	100000	family	SILVA	94	2.07194	4.11614
BMP	200(V3)	Yes	MC	100000	genus	SILVA	189	2.74812	6.62995
BMP	200(V3)	Yes	HC	25000	family	SILVA	126	3.88236	31.2969
BMP	200(V3)	Yes	HC	25000	genus	SILVA	317	4.35139	38.1014
BMP	200(V3)	Yes	HC	50000	family	SILVA	152	3.87175	31.1091
BMP	200(V3)	Yes	HC	50000	genus	SILVA	430	4.44566	40.5134
BMP	200(V3)	Yes	HC	100000	family	SILVA	185	3.85536	30.7254
BMP	200(V3)	Yes	HC	100000	genus	SILVA	616	4.45556	39.3616
BMP	400(V4-V5)	Yes	LC	25000	family	SILVA	68	3.05128	6.69229
BMP	400(V4-V5)	Yes	LC	25000	genus	SILVA	216	4.05943	26.6676
BMP	400(V4-V5)	Yes	LC	50000	family	SILVA	66	3.09692	7.2093
BMP	400(V4-V5)	Yes	LC	50000	genus	SILVA	234	4.16795	30.2062
BMP	400(V4-V5)	Yes	LC	100000	family	SILVA	77	3.14117	7.58485
BMP	400(V4-V5)	Yes	LC	100000	genus	SILVA	312	4.23856	35.3034
BMP	400(V4-V5)	Yes	MC	25000	family	SILVA	61	1.86841	3.71343
BMP	400(V4-V5)	Yes	MC	25000	genus	SILVA	143	2.60179	6.54943
BMP	400(V4-V5)	Yes	MC	50000	family	SILVA	65	1.91369	3.81253
BMP	400(V4-V5)	Yes	MC	50000	genus	SILVA	178	2.67569	6.68013
BMP	400(V4-V5)	Yes	MC	100000	family	SILVA	69	1.9593	3.89313
BMP	400(V4-V5)	Yes	MC	100000	genus	SILVA	213	2.71854	6.88613
BMP	400(V4-V5)	Yes	HC	25000	family	SILVA	68	3.76871	32.0006
BMP	400(V4-V5)	Yes	HC	25000	genus	SILVA	184	4.24462	44.4077
BMP	400(V4-V5)	Yes	HC	50000	family	SILVA	75	3.79134	32.5064
BMP	400(V4-V5)	Yes	HC	50000	genus	SILVA	229	4.27065	44.1969
BMP	400(V4-V5)	Yes	HC	100000	family	SILVA	71	3.78449	32.7755
BMP	400(V4-V5)	Yes	HC	100000	genus	SILVA	275	4.27038	44.4417
BMP	real				family	SILVA	55	1.61745	3.24393
BMP	real				genus	SILVA	173	3.00033	11.2657
kraken	200(V3)	No	LC	25000	family	MiniKraken DB	45	2.83602	6.25169
kraken	200(V3)	No	LC	25000	genus	MiniKraken DB	55	3.75071	29.4772
kraken	200(V3)	No	LC	50000	family	MiniKraken DB	45	2.84212	6.27186
kraken	200(V3)	No	LC	50000	genus	MiniKraken DB	55	3.75601	29.8627
kraken	200(V3)	No	LC	100000	family	MiniKraken DB	45	2.83457	6.18075
kraken	200(V3)	No	LC	100000	genus	MiniKraken DB	55	3.76762	30.6532
kraken	200(V3)	No	MC	25000	family	MiniKraken DB	45	1.8688	3.7723
kraken	200(V3)	No	MC	25000	genus	MiniKraken DB	55	2.11292	3.753
kraken	200(V3)	No	MC	50000	family	MiniKraken DB	45	1.87397	3.77327
kraken	200(V3)	No	MC	50000	genus	MiniKraken DB	55	2.122	3.78768
kraken	200(V3)	No	MC	100000	family	MiniKraken DB	45	1.86158	3.7455
kraken	200(V3)	No	MC	100000	genus	MiniKraken DB	55	2.10615	3.7485
kraken	200(V3)	No	HC	25000	family	MiniKraken DB	45	3.51403	24.9717
kraken	200(V3)	No	HC	25000	genus	MiniKraken DB	55	3.76673	30.6457
kraken	200(V3)	No	HC	50000	family	MiniKraken DB	45	3.50504	24.5266
kraken	200(V3)	No	HC	50000	genus	MiniKraken DB	55	3.76668	30.5758
kraken	200(V3)	No	HC	100000	family	MiniKraken DB	45	3.51064	24.8564
kraken	200(V3)	No	HC	100000	genus	MiniKraken DB	55	3.76841	30.7639
kraken	400(V4-V5)	No	LC	25000	family	MiniKraken DB	50	2.99638	7.08265
kraken	400(V4-V5)	No	LC	25000	genus	MiniKraken DB	64	3.22059	7.9034
kraken	400(V4-V5)	No	LC	50000	family	MiniKraken DB	50	3.00801	7.25442
kraken	400(V4-V5)	No	LC	50000	genus	MiniKraken DB	64	3.23535	8.13853
kraken	400(V4-V5)	No	LC	100000	family	MiniKraken DB	50	2.99332	7.09789
kraken	400(V4-V5)	No	LC	100000	genus	MiniKraken DB	64	3.2162	7.9088
kraken	400(V4-V5)	No	MC	25000	family	MiniKraken DB	50	1.95422	3.90133
kraken	400(V4-V5)	No	MC	25000	genus	MiniKraken DB	64	2.29001	5.89668
kraken	400(V4-V5)	No	MC	50000	family	MiniKraken DB	50	1.96737	3.94011
kraken	400(V4-V5)	No	MC	50000	genus	MiniKraken DB	64	2.30614	5.94484
kraken	400(V4-V5)	No	MC	100000	family	MiniKraken DB	50	1.95849	3.9004
kraken	400(V4-V5)	No	MC	100000	genus	MiniKraken DB	64	2.30154	5.92693
kraken	400(V4-V5)	No	HC	25000	family	MiniKraken DB	50	3.63477	27.9829
kraken	400(V4-V5)	No	HC	25000	genus	MiniKraken DB	64	3.90251	34.4907
kraken	400(V4-V5)	No	HC	50000	family	MiniKraken DB	50	3.62719	27.6366
kraken	400(V4-V5)	No	HC	50000	genus	MiniKraken DB	64	3.89718	34.091
kraken	400(V4-V5)	No	HC	100000	family	MiniKraken DB	50	3.62783	27.5433
kraken	400(V4-V5)	No	HC	100000	genus	MiniKraken DB	64	3.897	33.9478
kraken	200(V3)	Yes	LC	25000	family	MiniKraken DB	49	2.83794	6.50564
kraken	200(V3)	Yes	LC	25000	genus	MiniKraken DB	67	3.69817	26.7976
kraken	200(V3)	Yes	LC	50000	family	MiniKraken DB	53	2.84197	6.4535
kraken	200(V3)	Yes	LC	50000	genus	MiniKraken DB	70	3.70183	26.9164
kraken	200(V3)	Yes	LC	100000	family	MiniKraken DB	61	2.83618	6.37524
kraken	200(V3)	Yes	LC	100000	genus	MiniKraken DB	86	3.71795	27.7067
kraken	200(V3)	Yes	MC	25000	family	MiniKraken DB	46	1.87305	3.83713
kraken	200(V3)	Yes	MC	25000	genus	MiniKraken DB	59	2.1046	3.73926
kraken	200(V3)	Yes	MC	50000	family	MiniKraken DB	49	1.88458	3.85213
kraken	200(V3)	Yes	MC	50000	genus	MiniKraken DB	62	2.12517	3.80134
kraken	200(V3)	Yes	MC	100000	family	MiniKraken DB	51	1.86943	3.81545
kraken	200(V3)	Yes	MC	100000	genus	MiniKraken DB	68	2.1094	3.75658
kraken	200(V3)	Yes	HC	25000	family	MiniKraken DB	51	3.46088	23.5179
kraken	200(V3)	Yes	HC	25000	genus	MiniKraken DB	66	3.69485	27.3598
kraken	200(V3)	Yes	HC	50000	family	MiniKraken DB	54	3.45937	23.2516
kraken	200(V3)	Yes	HC	50000	genus	MiniKraken DB	73	3.69999	27.3063
kraken	200(V3)	Yes	HC	100000	family	MiniKraken DB	61	3.46211	23.4134
kraken	200(V3)	Yes	HC	100000	genus	MiniKraken DB	91	3.7038	27.4316
kraken	400(V4-V5)	Yes	LC	25000	family	MiniKraken DB	52	2.96177	6.72172
kraken	400(V4-V5)	Yes	LC	25000	genus	MiniKraken DB	73	3.24599	8.19437
kraken	400(V4-V5)	Yes	LC	50000	family	MiniKraken DB	54	2.9796	6.91774
kraken	400(V4-V5)	Yes	LC	50000	genus	MiniKraken DB	77	3.2658	8.48068
kraken	400(V4-V5)	Yes	LC	100000	family	MiniKraken DB	58	2.96526	6.768
kraken	400(V4-V5)	Yes	LC	100000	genus	MiniKraken DB	86	3.25153	8.26692
kraken	400(V4-V5)	Yes	MC	25000	family	MiniKraken DB	51	1.92602	3.8369
kraken	400(V4-V5)	Yes	MC	25000	genus	MiniKraken DB	68	2.27148	5.8236
kraken	400(V4-V5)	Yes	MC	50000	family	MiniKraken DB	51	1.93492	3.86551
kraken	400(V4-V5)	Yes	MC	50000	genus	MiniKraken DB	70	2.28429	5.85551
kraken	400(V4-V5)	Yes	MC	100000	family	MiniKraken DB	54	1.92659	3.82812
kraken	400(V4-V5)	Yes	MC	100000	genus	MiniKraken DB	74	2.2841	5.85196
kraken	400(V4-V5)	Yes	HC	25000	family	MiniKraken DB	53	3.63303	27.7565
kraken	400(V4-V5)	Yes	HC	25000	genus	MiniKraken DB	75	3.90695	34.2174
kraken	400(V4-V5)	Yes	HC	50000	family	MiniKraken DB	55	3.62725	27.5008
kraken	400(V4-V5)	Yes	HC	50000	genus	MiniKraken DB	81	3.90666	33.9992
kraken	400(V4-V5)	Yes	HC	100000	family	MiniKraken DB	61	3.62815	27.3366
kraken	400(V4-V5)	Yes	HC	100000	genus	MiniKraken DB	96	3.90473	33.6163
kraken	real				family	MiniKraken DB	55	1.9653	5.03835
kraken	real				genus	MiniKraken DB	64	2.67102	10.8612
mothur	200(V3)	No	LC	25000	family	SILVA	46	2.92705	6.97328
mothur	200(V3)	No	LC	25000	genus	SILVA	56	3.05787	7.07632
mothur	200(V3)	No	LC	50000	family	SILVA	46	2.93498	7.0111
mothur	200(V3)	No	LC	50000	genus	SILVA	56	3.06212	7.10853
mothur	200(V3)	No	LC	100000	family	SILVA	46	2.91505	6.88061
mothur	200(V3)	No	LC	100000	genus	SILVA	56	3.04372	6.97595
mothur	200(V3)	No	MC	25000	family	SILVA	46	1.92618	3.88803
mothur	200(V3)	No	MC	25000	genus	SILVA	56	1.96379	3.8906
mothur	200(V3)	No	MC	50000	family	SILVA	46	1.93957	3.9085
mothur	200(V3)	No	MC	50000	genus	SILVA	57	1.98258	3.91174
mothur	200(V3)	No	MC	100000	family	SILVA	46	1.92311	3.86891
mothur	200(V3)	No	MC	100000	genus	SILVA	56	1.9588	3.87122
mothur	200(V3)	No	HC	25000	family	SILVA	46	3.53581	25.8514
mothur	200(V3)	No	HC	25000	genus	SILVA	56	3.72555	29.1489
mothur	200(V3)	No	HC	50000	family	SILVA	45	3.53284	27.0138
mothur	200(V3)	No	HC	50000	genus	SILVA	55	3.72085	30.5172
mothur	200(V3)	No	HC	100000	family	SILVA	46	3.53393	25.8768
mothur	200(V3)	No	HC	100000	genus	SILVA	57	3.75	29.9975
mothur	400(V4-V5)	No	LC	25000	family	SILVA	43	2.79686	6.12242
mothur	400(V4-V5)	No	LC	25000	genus	SILVA	54	2.94033	6.20721
mothur	400(V4-V5)	No	LC	50000	family	SILVA	43	2.81422	6.29382
mothur	400(V4-V5)	No	LC	50000	genus	SILVA	54	2.95907	6.38623
mothur	400(V4-V5)	No	LC	100000	family	SILVA	43	2.80051	6.17165
mothur	400(V4-V5)	No	LC	100000	genus	SILVA	54	2.94501	6.25965
mothur	400(V4-V5)	No	MC	25000	family	SILVA	43	1.85344	3.74507
mothur	400(V4-V5)	No	MC	25000	genus	SILVA	54	1.89255	3.74742
mothur	400(V4-V5)	No	MC	50000	family	SILVA	43	1.86343	3.77635
mothur	400(V4-V5)	No	MC	50000	genus	SILVA	54	1.90337	3.77887
mothur	400(V4-V5)	No	MC	100000	family	SILVA	43	1.85618	3.74105
mothur	400(V4-V5)	No	MC	100000	genus	SILVA	54	1.89528	3.74341
mothur	400(V4-V5)	No	HC	25000	family	SILVA	43	3.45971	23.4896
mothur	400(V4-V5)	No	HC	25000	genus	SILVA	54	3.67663	26.6913
mothur	400(V4-V5)	No	HC	50000	family	SILVA	43	3.45588	23.3372
mothur	400(V4-V5)	No	HC	50000	genus	SILVA	54	3.67087	26.4835
mothur	400(V4-V5)	No	HC	100000	family	SILVA	43	3.45307	23.1582
mothur	400(V4-V5)	No	HC	100000	genus	SILVA	54	3.66831	26.2409
mothur	200(V3)	Yes	LC	25000	family	SILVA	52	2.98498	7.99817
mothur	200(V3)	Yes	LC	25000	genus	SILVA	76	3.15373	8.15458
mothur	200(V3)	Yes	LC	50000	family	SILVA	54	2.98736	7.85357
mothur	200(V3)	Yes	LC	50000	genus	SILVA	82	3.13136	7.97376
mothur	200(V3)	Yes	LC	100000	family	SILVA	56	2.96997	7.60034
mothur	200(V3)	Yes	LC	100000	genus	SILVA	85	3.13434	7.73219
mothur	200(V3)	Yes	MC	25000	family	SILVA	51	2.01166	4.12272
mothur	200(V3)	Yes	MC	25000	genus	SILVA	68	2.06251	4.13176
mothur	200(V3)	Yes	MC	50000	family	SILVA	52	2.01265	4.1269
mothur	200(V3)	Yes	MC	50000	genus	SILVA	76	2.0697	4.13715
mothur	200(V3)	Yes	MC	100000	family	SILVA	51	1.99586	4.08587
mothur	200(V3)	Yes	MC	100000	genus	SILVA	74	2.04463	4.0935
mothur	200(V3)	Yes	HC	25000	family	SILVA	56	3.47596	19.1479
mothur	200(V3)	Yes	HC	25000	genus	SILVA	85	3.69174	20.8634
mothur	200(V3)	Yes	HC	50000	family	SILVA	54	3.49076	19.7552
mothur	200(V3)	Yes	HC	50000	genus	SILVA	84	3.73701	21.8895
mothur	200(V3)	Yes	HC	100000	family	SILVA	56	3.48304	19.7319
mothur	200(V3)	Yes	HC	100000	genus	SILVA	93	3.713	21.6276
mothur	400(V4-V5)	Yes	LC	25000	family	SILVA	54	3.02766	6.84502
mothur	400(V4-V5)	Yes	LC	25000	genus	SILVA	85	3.31089	7.71395
mothur	400(V4-V5)	Yes	LC	50000	family	SILVA	56	3.0481	7.08155
mothur	400(V4-V5)	Yes	LC	50000	genus	SILVA	88	3.32747	7.96906
mothur	400(V4-V5)	Yes	LC	100000	family	SILVA	56	3.03072	6.92854
mothur	400(V4-V5)	Yes	LC	100000	genus	SILVA	90	3.29615	7.7118
mothur	400(V4-V5)	Yes	MC	25000	family	SILVA	54	1.95481	3.89255
mothur	400(V4-V5)	Yes	MC	25000	genus	SILVA	80	2.05375	3.99519
mothur	400(V4-V5)	Yes	MC	50000	family	SILVA	54	1.96806	3.93455
mothur	400(V4-V5)	Yes	MC	50000	genus	SILVA	86	2.06317	4.02279
mothur	400(V4-V5)	Yes	MC	100000	family	SILVA	54	1.96288	3.90608
mothur	400(V4-V5)	Yes	MC	100000	genus	SILVA	85	2.05774	3.99577
mothur	400(V4-V5)	Yes	HC	25000	family	SILVA	55	3.72087	32.7823
mothur	400(V4-V5)	Yes	HC	25000	genus	SILVA	85	4.05968	45.4012
mothur	400(V4-V5)	Yes	HC	50000	family	SILVA	55	3.71747	32.5516
mothur	400(V4-V5)	Yes	HC	50000	genus	SILVA	89	4.07298	45.9946
mothur	400(V4-V5)	Yes	HC	100000	family	SILVA	56	3.71671	32.3864
mothur	400(V4-V5)	Yes	HC	100000	genus	SILVA	89	4.0497	44.5141
mothur	real				family	SILVA	31	1.70458	3.77799
mothur	real				genus	SILVA	65	2.36337	6.98115
mothur	200(V3)	No	LC	25000	family	Greengenes	53	3.08029	7.56142
mothur	200(V3)	No	LC	25000	genus	Greengenes	64	3.21504	7.67865
mothur	200(V3)	No	LC	50000	family	Greengenes	54	3.09669	7.5827
mothur	200(V3)	No	LC	50000	genus	Greengenes	64	3.21183	7.67643
mothur	200(V3)	No	LC	100000	family	Greengenes	52	3.06951	7.47697
mothur	200(V3)	No	LC	100000	genus	Greengenes	63	3.20349	7.58763
mothur	200(V3)	No	MC	25000	family	Greengenes	52	1.99778	3.98698
mothur	200(V3)	No	MC	25000	genus	Greengenes	62	2.03246	3.98933
mothur	200(V3)	No	MC	50000	family	Greengenes	51	1.99681	3.98601
mothur	200(V3)	No	MC	50000	genus	Greengenes	61	2.03214	3.98844
mothur	200(V3)	No	MC	100000	family	Greengenes	52	1.98655	3.94988
mothur	200(V3)	No	MC	100000	genus	Greengenes	62	2.02027	3.95205
mothur	200(V3)	No	HC	25000	family	Greengenes	54	3.74202	32.6892
mothur	200(V3)	No	HC	25000	genus	Greengenes	64	3.91516	37.0903
mothur	200(V3)	No	HC	50000	family	Greengenes	54	3.72637	31.7531
mothur	200(V3)	No	HC	50000	genus	Greengenes	64	3.90234	36.0456
mothur	200(V3)	No	HC	100000	family	Greengenes	54	3.73789	32.4024
mothur	200(V3)	No	HC	100000	genus	Greengenes	64	3.90739	36.5291
mothur	400(V4-V5)	No	LC	25000	family	Greengenes	48	2.92607	6.69824
mothur	400(V4-V5)	No	LC	25000	genus	Greengenes	59	3.06303	6.79073
mothur	400(V4-V5)	No	LC	50000	family	Greengenes	48	2.93818	6.8542
mothur	400(V4-V5)	No	LC	50000	genus	Greengenes	59	3.07679	6.95456
mothur	400(V4-V5)	No	LC	100000	family	Greengenes	48	2.92815	6.74537
mothur	400(V4-V5)	No	LC	100000	genus	Greengenes	59	3.06616	6.84126
mothur	400(V4-V5)	No	MC	25000	family	Greengenes	48	1.9131	3.83316
mothur	400(V4-V5)	No	MC	25000	genus	Greengenes	59	1.95176	3.83556
mothur	400(V4-V5)	No	MC	50000	family	Greengenes	48	1.9238	3.86618
mothur	400(V4-V5)	No	MC	50000	genus	Greengenes	59	1.96326	3.86876
mothur	400(V4-V5)	No	MC	100000	family	Greengenes	48	1.91974	3.83616
mothur	400(V4-V5)	No	MC	100000	genus	Greengenes	59	1.95834	3.83859
mothur	400(V4-V5)	No	HC	25000	family	Greengenes	48	3.57424	26.1309
mothur	400(V4-V5)	No	HC	25000	genus	Greengenes	59	3.77738	29.5941
mothur	400(V4-V5)	No	HC	50000	family	Greengenes	48	3.5708	25.9381
mothur	400(V4-V5)	No	HC	50000	genus	Greengenes	59	3.77246	29.3473
mothur	400(V4-V5)	No	HC	100000	family	Greengenes	48	3.56926	25.7895
mothur	400(V4-V5)	No	HC	100000	genus	Greengenes	59	3.77088	29.1334
mothur	200(V3)	Yes	LC	25000	family	Greengenes	62	3.18904	9.55668
mothur	200(V3)	Yes	LC	25000	genus	Greengenes	91	3.36118	9.75113
mothur	200(V3)	Yes	LC	50000	family	Greengenes	61	3.17213	9.43036
mothur	200(V3)	Yes	LC	50000	genus	Greengenes	90	3.33809	9.60881
mothur	200(V3)	Yes	LC	100000	family	Greengenes	63	3.1535	9.09224
mothur	200(V3)	Yes	LC	100000	genus	Greengenes	94	3.32842	9.26819
mothur	200(V3)	Yes	MC	25000	family	Greengenes	57	2.10155	4.32286
mothur	200(V3)	Yes	MC	25000	genus	Greengenes	79	2.15656	4.32679
mothur	200(V3)	Yes	MC	50000	family	Greengenes	59	2.1	4.30013
mothur	200(V3)	Yes	MC	50000	genus	Greengenes	82	2.15705	4.30536
mothur	200(V3)	Yes	MC	100000	family	Greengenes	59	2.08567	4.27278
mothur	200(V3)	Yes	MC	100000	genus	Greengenes	87	2.13699	4.27681
mothur	200(V3)	Yes	HC	25000	family	Greengenes	62	3.62299	25.2812
mothur	200(V3)	Yes	HC	25000	genus	Greengenes	91	3.85719	28.073
mothur	200(V3)	Yes	HC	50000	family	Greengenes	62	3.63897	26.2244
mothur	200(V3)	Yes	HC	50000	genus	Greengenes	92	3.88505	29.3636
mothur	200(V3)	Yes	HC	100000	family	Greengenes	64	3.65167	26.9542
mothur	200(V3)	Yes	HC	100000	genus	Greengenes	97	3.89685	30.3122
mothur	400(V4-V5)	Yes	LC	25000	family	Greengenes	63	3.10824	7.37521
mothur	400(V4-V5)	Yes	LC	25000	genus	Greengenes	94	3.55648	14.166
mothur	400(V4-V5)	Yes	LC	50000	family	Greengenes	63	3.12128	7.58034
mothur	400(V4-V5)	Yes	LC	50000	genus	Greengenes	96	3.5658	14.532
mothur	400(V4-V5)	Yes	LC	100000	family	Greengenes	63	3.10853	7.4483
mothur	400(V4-V5)	Yes	LC	100000	genus	Greengenes	97	3.55253	14.2117
mothur	400(V4-V5)	Yes	MC	25000	family	Greengenes	60	1.9996	3.98218
mothur	400(V4-V5)	Yes	MC	25000	genus	Greengenes	89	2.32129	5.28751
mothur	400(V4-V5)	Yes	MC	50000	family	Greengenes	61	2.01543	4.02399
mothur	400(V4-V5)	Yes	MC	50000	genus	Greengenes	92	2.3291	5.27768
mothur	400(V4-V5)	Yes	MC	100000	family	Greengenes	62	2.01224	4.00148
mothur	400(V4-V5)	Yes	MC	100000	genus	Greengenes	96	2.32763	5.25966
mothur	400(V4-V5)	Yes	HC	25000	family	Greengenes	62	3.76147	31.6732
mothur	400(V4-V5)	Yes	HC	25000	genus	Greengenes	95	4.08581	40.6466
mothur	400(V4-V5)	Yes	HC	50000	family	Greengenes	63	3.76235	31.6869
mothur	400(V4-V5)	Yes	HC	50000	genus	Greengenes	95	4.08247	40.5511
mothur	400(V4-V5)	Yes	HC	100000	family	Greengenes	63	3.76213	31.4722
mothur	400(V4-V5)	Yes	HC	100000	genus	Greengenes	98	4.08723	40.4895
mothur	real				family	Greengenes	39	1.73858	3.81032
mothur	real				genus	Greengenes	78	2.1415	4.54173
One Codex	200(V3)	No	LC	25000	family	RefSeq 65	47	2.90399	6.67125
One Codex	200(V3)	No	LC	25000	genus	RefSeq 65	59	3.79277	29.4768
One Codex	200(V3)	No	LC	50000	family	RefSeq 65	47	2.90776	6.68335
One Codex	200(V3)	No	LC	50000	genus	RefSeq 65	59	3.79391	29.4893
One Codex	200(V3)	No	LC	100000	family	RefSeq 65	47	2.90145	6.58707
One Codex	200(V3)	No	LC	100000	genus	RefSeq 65	59	3.80817	30.5217
One Codex	200(V3)	No	MC	25000	family	RefSeq 65	47	1.91406	3.85442
One Codex	200(V3)	No	MC	25000	genus	RefSeq 65	59	2.20811	3.97273
One Codex	200(V3)	No	MC	50000	family	RefSeq 65	47	1.91428	3.84653
One Codex	200(V3)	No	MC	50000	genus	RefSeq 65	59	2.21298	3.99634
One Codex	200(V3)	No	MC	100000	family	RefSeq 65	47	1.90327	3.82033
One Codex	200(V3)	No	MC	100000	genus	RefSeq 65	59	2.19741	3.95558
One Codex	200(V3)	No	HC	25000	family	RefSeq 65	47	3.55739	25.7589
One Codex	200(V3)	No	HC	25000	genus	RefSeq 65	59	3.80967	30.6811
One Codex	200(V3)	No	HC	50000	family	RefSeq 65	47	3.54771	25.2526
One Codex	200(V3)	No	HC	50000	genus	RefSeq 65	59	3.80474	30.2454
One Codex	200(V3)	No	HC	100000	family	RefSeq 65	47	3.55332	25.5798
One Codex	200(V3)	No	HC	100000	genus	RefSeq 65	59	3.80936	30.6358
One Codex	400(V4-V5)	No	LC	25000	family	RefSeq 65	50	2.99637	7.08295
One Codex	400(V4-V5)	No	LC	25000	genus	RefSeq 65	65	3.24908	8.11382
One Codex	400(V4-V5)	No	LC	50000	family	RefSeq 65	50	3.00797	7.25396
One Codex	400(V4-V5)	No	LC	50000	genus	RefSeq 65	65	3.2639	8.35981
One Codex	400(V4-V5)	No	LC	100000	family	RefSeq 65	50	2.99334	7.09803
One Codex	400(V4-V5)	No	LC	100000	genus	RefSeq 65	65	3.24494	8.12359
One Codex	400(V4-V5)	No	MC	25000	family	RefSeq 65	50	1.95418	3.90114
One Codex	400(V4-V5)	No	MC	25000	genus	RefSeq 65	65	2.30486	5.93636
One Codex	400(V4-V5)	No	MC	50000	family	RefSeq 65	50	1.96746	3.94026
One Codex	400(V4-V5)	No	MC	50000	genus	RefSeq 65	65	2.32226	5.98963
One Codex	400(V4-V5)	No	MC	100000	family	RefSeq 65	50	1.95848	3.90035
One Codex	400(V4-V5)	No	MC	100000	genus	RefSeq 65	65	2.31804	5.97298
One Codex	400(V4-V5)	No	HC	25000	family	RefSeq 65	50	3.63474	27.9813
One Codex	400(V4-V5)	No	HC	25000	genus	RefSeq 65	65	3.92183	35.3969
One Codex	400(V4-V5)	No	HC	50000	family	RefSeq 65	50	3.62716	27.6345
One Codex	400(V4-V5)	No	HC	50000	genus	RefSeq 65	65	3.91652	34.9541
One Codex	400(V4-V5)	No	HC	100000	family	RefSeq 65	50	3.62783	27.5432
One Codex	400(V4-V5)	No	HC	100000	genus	RefSeq 65	65	3.91785	34.8913
One Codex	200(V3)	Yes	LC	25000	family	RefSeq 65	53	2.96641	7.28731
One Codex	200(V3)	Yes	LC	25000	genus	RefSeq 65	74	3.83661	30.4371
One Codex	200(V3)	Yes	LC	50000	family	RefSeq 65	61	2.97447	7.31429
One Codex	200(V3)	Yes	LC	50000	genus	RefSeq 65	81	3.8423	30.5814
One Codex	200(V3)	Yes	LC	100000	family	RefSeq 65	68	2.97046	7.21474
One Codex	200(V3)	Yes	LC	100000	genus	RefSeq 65	98	3.85923	31.6078
One Codex	200(V3)	Yes	MC	25000	family	RefSeq 65	50	1.94936	3.98035
One Codex	200(V3)	Yes	MC	25000	genus	RefSeq 65	69	2.22737	3.97436
One Codex	200(V3)	Yes	MC	50000	family	RefSeq 65	55	1.95246	3.97913
One Codex	200(V3)	Yes	MC	50000	genus	RefSeq 65	73	2.23497	4.00967
One Codex	200(V3)	Yes	MC	100000	family	RefSeq 65	56	1.9392	3.94658
One Codex	200(V3)	Yes	MC	100000	genus	RefSeq 65	77	2.21767	3.96473
One Codex	200(V3)	Yes	HC	25000	family	RefSeq 65	56	3.57015	26.024
One Codex	200(V3)	Yes	HC	25000	genus	RefSeq 65	75	3.84459	31.5372
One Codex	200(V3)	Yes	HC	50000	family	RefSeq 65	59	3.56052	25.5055
One Codex	200(V3)	Yes	HC	50000	genus	RefSeq 65	82	3.84168	31.1965
One Codex	200(V3)	Yes	HC	100000	family	RefSeq 65	67	3.56923	25.8584
One Codex	200(V3)	Yes	HC	100000	genus	RefSeq 65	100	3.84723	31.4931
One Codex	400(V4-V5)	Yes	LC	25000	family	RefSeq 65	50	2.99032	7.06639
One Codex	400(V4-V5)	Yes	LC	25000	genus	RefSeq 65	73	3.26612	8.13231
One Codex	400(V4-V5)	Yes	LC	50000	family	RefSeq 65	51	3.00352	7.24227
One Codex	400(V4-V5)	Yes	LC	50000	genus	RefSeq 65	78	3.2834	8.38363
One Codex	400(V4-V5)	Yes	LC	100000	family	RefSeq 65	54	2.98909	7.08779
One Codex	400(V4-V5)	Yes	LC	100000	genus	RefSeq 65	89	3.26626	8.15477
One Codex	400(V4-V5)	Yes	MC	25000	family	RefSeq 65	50	1.95157	3.89847
One Codex	400(V4-V5)	Yes	MC	25000	genus	RefSeq 65	71	2.31105	5.94266
One Codex	400(V4-V5)	Yes	MC	50000	family	RefSeq 65	50	1.96563	3.9393
One Codex	400(V4-V5)	Yes	MC	50000	genus	RefSeq 65	71	2.32693	5.99153
One Codex	400(V4-V5)	Yes	MC	100000	family	RefSeq 65	51	1.95682	3.89946
One Codex	400(V4-V5)	Yes	MC	100000	genus	RefSeq 65	73	2.32211	5.97234
One Codex	400(V4-V5)	Yes	HC	25000	family	RefSeq 65	51	3.62943	27.8018
One Codex	400(V4-V5)	Yes	HC	25000	genus	RefSeq 65	74	3.94704	35.559
One Codex	400(V4-V5)	Yes	HC	50000	family	RefSeq 65	51	3.62052	27.4149
One Codex	400(V4-V5)	Yes	HC	50000	genus	RefSeq 65	78	3.94002	35.0543
One Codex	400(V4-V5)	Yes	HC	100000	family	RefSeq 65	52	3.62132	27.3283
One Codex	400(V4-V5)	Yes	HC	100000	genus	RefSeq 65	89	3.94402	35.0014
One Codex	200(V3)	No	LC	25000	family	One Codex 28k	45	2.79386	5.92369
One Codex	200(V3)	No	LC	25000	genus	One Codex 28k	54	3.684	25.8782
One Codex	200(V3)	No	LC	50000	family	One Codex 28k	45	2.79014	5.89903
One Codex	200(V3)	No	LC	50000	genus	One Codex 28k	54	3.68172	25.746
One Codex	200(V3)	No	LC	100000	family	One Codex 28k	45	2.78941	5.84646
One Codex	200(V3)	No	LC	100000	genus	One Codex 28k	54	3.69743	26.7415
One Codex	200(V3)	No	MC	25000	family	One Codex 28k	45	1.84143	3.71859
One Codex	200(V3)	No	MC	25000	genus	One Codex 28k	54	2.08545	3.73441
One Codex	200(V3)	No	MC	50000	family	One Codex 28k	45	1.84226	3.71037
One Codex	200(V3)	No	MC	50000	genus	One Codex 28k	54	2.08944	3.75455
One Codex	200(V3)	No	MC	100000	family	One Codex 28k	45	1.83071	3.68568
One Codex	200(V3)	No	MC	100000	genus	One Codex 28k	54	2.07574	3.71847
One Codex	200(V3)	No	HC	25000	family	One Codex 28k	45	3.49635	23.7127
One Codex	200(V3)	No	HC	25000	genus	One Codex 28k	54	3.69671	26.8124
One Codex	200(V3)	No	HC	50000	family	One Codex 28k	45	3.48444	23.1434
One Codex	200(V3)	No	HC	50000	genus	One Codex 28k	54	3.69221	26.4228
One Codex	200(V3)	No	HC	100000	family	One Codex 28k	45	3.49226	23.5074
One Codex	200(V3)	No	HC	100000	genus	One Codex 28k	54	3.69827	26.8043
One Codex	400(V4-V5)	No	LC	25000	family	One Codex 28k	49	2.88776	6.13778
One Codex	400(V4-V5)	No	LC	25000	genus	One Codex 28k	61	3.09857	6.82251
One Codex	400(V4-V5)	No	LC	50000	family	One Codex 28k	49	2.90398	6.30508
One Codex	400(V4-V5)	No	LC	50000	genus	One Codex 28k	61	3.1185	7.05567
One Codex	400(V4-V5)	No	LC	100000	family	One Codex 28k	49	2.88922	6.16905
One Codex	400(V4-V5)	No	LC	100000	genus	One Codex 28k	61	3.09908	6.85669
One Codex	400(V4-V5)	No	MC	25000	family	One Codex 28k	49	1.87373	3.73195
One Codex	400(V4-V5)	No	MC	25000	genus	One Codex 28k	61	2.20774	5.63643
One Codex	400(V4-V5)	No	MC	50000	family	One Codex 28k	49	1.88834	3.77012
One Codex	400(V4-V5)	No	MC	50000	genus	One Codex 28k	61	2.22538	5.68745
One Codex	400(V4-V5)	No	MC	100000	family	One Codex 28k	49	1.87613	3.7285
One Codex	400(V4-V5)	No	MC	100000	genus	One Codex 28k	61	2.21866	5.6682
One Codex	400(V4-V5)	No	HC	25000	family	One Codex 28k	49	3.6056	26.6072
One Codex	400(V4-V5)	No	HC	25000	genus	One Codex 28k	61	3.85947	32.7542
One Codex	400(V4-V5)	No	HC	50000	family	One Codex 28k	49	3.60449	26.52
One Codex	400(V4-V5)	No	HC	50000	genus	One Codex 28k	61	3.86019	32.6893
One Codex	400(V4-V5)	No	HC	100000	family	One Codex 28k	49	3.60066	26.1812
One Codex	400(V4-V5)	No	HC	100000	genus	One Codex 28k	61	3.85596	32.1976
One Codex	200(V3)	Yes	LC	25000	family	One Codex 28k	65	3.24873	13.2536
One Codex	200(V3)	Yes	LC	25000	genus	One Codex 28k	96	3.49703	13.7205
One Codex	200(V3)	Yes	LC	50000	family	One Codex 28k	72	3.26128	13.3628
One Codex	200(V3)	Yes	LC	50000	genus	One Codex 28k	118	3.51087	13.799
One Codex	200(V3)	Yes	LC	100000	family	One Codex 28k	84	3.26045	13.2254
One Codex	200(V3)	Yes	LC	100000	genus	One Codex 28k	140	3.51124	13.6167
One Codex	200(V3)	Yes	MC	25000	family	One Codex 28k	56	2.23843	5.85142
One Codex	200(V3)	Yes	MC	25000	genus	One Codex 28k	74	2.21045	4.93336
One Codex	200(V3)	Yes	MC	50000	family	One Codex 28k	58	2.24722	5.88969
One Codex	200(V3)	Yes	MC	50000	genus	One Codex 28k	81	2.21998	4.95756
One Codex	200(V3)	Yes	MC	100000	family	One Codex 28k	66	2.23728	5.84481
One Codex	200(V3)	Yes	MC	100000	genus	One Codex 28k	102	2.2152	4.92972
One Codex	200(V3)	Yes	HC	25000	family	One Codex 28k	72	3.66527	28.0578
One Codex	200(V3)	Yes	HC	25000	genus	One Codex 28k	106	3.87779	31.1999
One Codex	200(V3)	Yes	HC	50000	family	One Codex 28k	76	3.65306	27.7514
One Codex	200(V3)	Yes	HC	50000	genus	One Codex 28k	119	3.87228	30.8849
One Codex	200(V3)	Yes	HC	100000	family	One Codex 28k	87	3.66041	27.9775
One Codex	200(V3)	Yes	HC	100000	genus	One Codex 28k	149	3.88367	31.3233
One Codex	400(V4-V5)	Yes	LC	25000	family	One Codex 28k	68	2.97626	6.78465
One Codex	400(V4-V5)	Yes	LC	25000	genus	One Codex 28k	98	3.21069	7.62973
One Codex	400(V4-V5)	Yes	LC	50000	family	One Codex 28k	71	2.99224	6.95923
One Codex	400(V4-V5)	Yes	LC	50000	genus	One Codex 28k	114	3.2354	7.87653
One Codex	400(V4-V5)	Yes	LC	100000	family	One Codex 28k	82	2.98059	6.82672
One Codex	400(V4-V5)	Yes	LC	100000	genus	One Codex 28k	143	3.22362	7.68267
One Codex	400(V4-V5)	Yes	MC	25000	family	One Codex 28k	56	1.92869	3.8476
One Codex	400(V4-V5)	Yes	MC	25000	genus	One Codex 28k	79	2.27243	5.83259
One Codex	400(V4-V5)	Yes	MC	50000	family	One Codex 28k	57	1.94507	3.88768
One Codex	400(V4-V5)	Yes	MC	50000	genus	One Codex 28k	83	2.29227	5.88477
One Codex	400(V4-V5)	Yes	MC	100000	family	One Codex 28k	69	1.94025	3.85423
One Codex	400(V4-V5)	Yes	MC	100000	genus	One Codex 28k	103	2.29449	5.88155
One Codex	400(V4-V5)	Yes	HC	25000	family	One Codex 28k	67	3.63936	27.2135
One Codex	400(V4-V5)	Yes	HC	25000	genus	One Codex 28k	98	3.91623	32.9758
One Codex	400(V4-V5)	Yes	HC	50000	family	One Codex 28k	79	3.6388	26.9673
One Codex	400(V4-V5)	Yes	HC	50000	genus	One Codex 28k	126	3.92263	32.6708
One Codex	400(V4-V5)	Yes	HC	100000	family	One Codex 28k	93	3.6409	26.8108
One Codex	400(V4-V5)	Yes	HC	100000	genus	One Codex 28k	165	3.92898	32.5302
One Codex	real				family	RefSeq 65	81	2.34189	6.56778
One Codex	real				genus	RefSeq 65	118	2.87152	12.2869
One Codex	real				family	One Codex 28k	97	2.38715	7.34463
One Codex	real				genus	One Codex 28k	162	2.99669	13.2025
One Codex	200(V3)	No	LC	25000	family	SILVA	36	3.42409	26.4032
One Codex	200(V3)	No	LC	25000	genus	SILVA	38	3.49365	28.1323
One Codex	200(V3)	No	LC	50000	family	SILVA	36	3.42117	26.3036
One Codex	200(V3)	No	LC	50000	genus	SILVA	38	3.48865	27.9228
One Codex	200(V3)	No	LC	100000	family	SILVA	36	3.42665	26.6042
One Codex	200(V3)	No	LC	100000	genus	SILVA	38	3.49532	28.3357
One Codex	200(V3)	No	MC	25000	family	SILVA	36	1.61785	2.91396
One Codex	200(V3)	No	MC	25000	genus	SILVA	38	1.6162	2.88986
One Codex	200(V3)	No	MC	50000	family	SILVA	36	1.59158	2.8725
One Codex	200(V3)	No	MC	50000	genus	SILVA	38	1.58572	2.84509
One Codex	200(V3)	No	MC	100000	family	SILVA	36	1.58989	2.87249
One Codex	200(V3)	No	MC	100000	genus	SILVA	38	1.58324	2.84265
One Codex	200(V3)	No	HC	25000	family	SILVA	36	3.43381	26.949
One Codex	200(V3)	No	HC	25000	genus	SILVA	38	3.49768	28.4706
One Codex	200(V3)	No	HC	50000	family	SILVA	36	3.42257	26.2976
One Codex	200(V3)	No	HC	50000	genus	SILVA	38	3.49407	28.1493
One Codex	200(V3)	No	HC	100000	family	SILVA	36	3.42327	26.3343
One Codex	200(V3)	No	HC	100000	genus	SILVA	38	3.49471	28.1706
One Codex	400(V4-V5)	No	LC	25000	family	SILVA	35	2.24302	3.30215
One Codex	400(V4-V5)	No	LC	25000	genus	SILVA	38	3.49295	29.5612
One Codex	400(V4-V5)	No	LC	50000	family	SILVA	35	2.25413	3.35192
One Codex	400(V4-V5)	No	LC	50000	genus	SILVA	38	3.4879	29.0816
One Codex	400(V4-V5)	No	LC	100000	family	SILVA	35	2.23754	3.28641
One Codex	400(V4-V5)	No	LC	100000	genus	SILVA	38	3.49654	29.4415
One Codex	400(V4-V5)	No	MC	25000	family	SILVA	35	1.52803	3.17478
One Codex	400(V4-V5)	No	MC	25000	genus	SILVA	38	1.56248	2.80946
One Codex	400(V4-V5)	No	MC	50000	family	SILVA	35	1.54155	3.20527
One Codex	400(V4-V5)	No	MC	50000	genus	SILVA	38	1.58137	2.84091
One Codex	400(V4-V5)	No	MC	100000	family	SILVA	35	1.52964	3.17104
One Codex	400(V4-V5)	No	MC	100000	genus	SILVA	38	1.57824	2.8335
One Codex	400(V4-V5)	No	HC	25000	family	SILVA	35	3.34517	22.5473
One Codex	400(V4-V5)	No	HC	25000	genus	SILVA	38	3.48723	28.9415
One Codex	400(V4-V5)	No	HC	50000	family	SILVA	35	3.34686	22.5118
One Codex	400(V4-V5)	No	HC	50000	genus	SILVA	38	3.49458	29.2456
One Codex	400(V4-V5)	No	HC	100000	family	SILVA	35	3.34854	22.4986
One Codex	400(V4-V5)	No	HC	100000	genus	SILVA	38	3.49431	29.3208
One Codex	200(V3)	Yes	LC	25000	family	SILVA	99	3.3116	11.6207
One Codex	200(V3)	Yes	LC	25000	genus	SILVA	187	3.56323	12.4136
One Codex	200(V3)	Yes	LC	50000	family	SILVA	126	3.34149	12.0528
One Codex	200(V3)	Yes	LC	50000	genus	SILVA	243	3.59863	12.8353
One Codex	200(V3)	Yes	LC	100000	family	SILVA	135	3.32657	11.5858
One Codex	200(V3)	Yes	LC	100000	genus	SILVA	306	3.60199	12.4015
One Codex	200(V3)	Yes	MC	25000	family	SILVA	76	2.19662	5.25418
One Codex	200(V3)	Yes	MC	25000	genus	SILVA	120	2.33316	5.47454
One Codex	200(V3)	Yes	MC	50000	family	SILVA	89	2.19987	5.26666
One Codex	200(V3)	Yes	MC	50000	genus	SILVA	164	2.3368	5.47636
One Codex	200(V3)	Yes	MC	100000	family	SILVA	101	2.19314	5.25514
One Codex	200(V3)	Yes	MC	100000	genus	SILVA	189	2.33142	5.46729
One Codex	200(V3)	Yes	HC	25000	family	SILVA	108	3.79489	33.1286
One Codex	200(V3)	Yes	HC	25000	genus	SILVA	214	4.12164	40.1727
One Codex	200(V3)	Yes	HC	50000	family	SILVA	127	3.78691	31.9448
One Codex	200(V3)	Yes	HC	50000	genus	SILVA	260	4.12442	38.8924
One Codex	200(V3)	Yes	HC	100000	family	SILVA	146	3.7894	32.2099
One Codex	200(V3)	Yes	HC	100000	genus	SILVA	333	4.13654	39.3521
One Codex	400(V4-V5)	Yes	LC	25000	family	SILVA	96	3.06484	6.83771
One Codex	400(V4-V5)	Yes	LC	25000	genus	SILVA	210	3.7625	14.1094
One Codex	400(V4-V5)	Yes	LC	50000	family	SILVA	114	3.09118	7.04815
One Codex	400(V4-V5)	Yes	LC	50000	genus	SILVA	249	3.77793	14.1829
One Codex	400(V4-V5)	Yes	LC	100000	family	SILVA	129	3.07478	6.86788
One Codex	400(V4-V5)	Yes	LC	100000	genus	SILVA	335	3.7817	13.8678
One Codex	400(V4-V5)	Yes	MC	25000	family	SILVA	76	1.97286	3.91578
One Codex	400(V4-V5)	Yes	MC	25000	genus	SILVA	138	2.33953	5.11964
One Codex	400(V4-V5)	Yes	MC	50000	family	SILVA	85	1.99018	3.96449
One Codex	400(V4-V5)	Yes	MC	50000	genus	SILVA	176	2.36221	5.14841
One Codex	400(V4-V5)	Yes	MC	100000	family	SILVA	101	1.97963	3.91444
One Codex	400(V4-V5)	Yes	MC	100000	genus	SILVA	225	2.36566	5.14097
One Codex	400(V4-V5)	Yes	HC	25000	family	SILVA	104	3.76037	31.523
One Codex	400(V4-V5)	Yes	HC	25000	genus	SILVA	233	4.25385	47.5229
One Codex	400(V4-V5)	Yes	HC	50000	family	SILVA	119	3.76468	31.4918
One Codex	400(V4-V5)	Yes	HC	50000	genus	SILVA	278	4.27591	48.0566
One Codex	400(V4-V5)	Yes	HC	100000	family	SILVA	132	3.7632	31.4235
One Codex	400(V4-V5)	Yes	HC	100000	genus	SILVA	375	4.29225	48.2634
One Codex	real				family	SILVA	136	2.81474	9.13875
One Codex	real				genus	SILVA	265	2.91051	7.29534
QIIME UCLUST	200(V3)	No	LC	25000	family	Greengenes	54	3.07327	7.51367
QIIME UCLUST	200(V3)	No	LC	25000	genus	Greengenes	65	3.21624	7.88752
QIIME UCLUST	200(V3)	No	LC	50000	family	Greengenes	52	3.04099	7.46583
QIIME UCLUST	200(V3)	No	LC	50000	genus	Greengenes	65	3.20656	7.8406
QIIME UCLUST	200(V3)	No	LC	100000	family	Greengenes	53	3.04745	7.39191
QIIME UCLUST	200(V3)	No	LC	100000	genus	Greengenes	65	3.20625	7.76849
QIIME UCLUST	200(V3)	No	MC	25000	family	Greengenes	53	1.99448	3.98513
QIIME UCLUST	200(V3)	No	MC	25000	genus	Greengenes	68	2.31787	5.95535
QIIME UCLUST	200(V3)	No	MC	50000	family	Greengenes	53	2.00095	3.98569
QIIME UCLUST	200(V3)	No	MC	50000	genus	Greengenes	67	2.32561	5.98805
QIIME UCLUST	200(V3)	No	MC	100000	family	Greengenes	53	1.98527	3.949
QIIME UCLUST	200(V3)	No	MC	100000	genus	Greengenes	67	2.30974	5.93266
QIIME UCLUST	200(V3)	No	HC	25000	family	Greengenes	53	3.69782	30.4947
QIIME UCLUST	200(V3)	No	HC	25000	genus	Greengenes	67	3.9395	37.0187
QIIME UCLUST	200(V3)	No	HC	50000	family	Greengenes	55	3.72035	30.453
QIIME UCLUST	200(V3)	No	HC	50000	genus	Greengenes	68	3.9325	36.073
QIIME UCLUST	200(V3)	No	HC	100000	family	Greengenes	54	3.71393	30.7231
QIIME UCLUST	200(V3)	No	HC	100000	genus	Greengenes	67	3.92733	36.4771
QIIME UCLUST	400(V4-V5)	No	LC	25000	family	Greengenes	54	3.08644	7.58144
QIIME UCLUST	400(V4-V5)	No	LC	25000	genus	Greengenes	66	3.28205	8.65978
QIIME UCLUST	400(V4-V5)	No	LC	50000	family	Greengenes	54	3.09764	7.75733
QIIME UCLUST	400(V4-V5)	No	LC	50000	genus	Greengenes	67	3.32048	8.95958
QIIME UCLUST	400(V4-V5)	No	LC	100000	family	Greengenes	54	3.08399	7.59284
QIIME UCLUST	400(V4-V5)	No	LC	100000	genus	Greengenes	66	3.2874	8.69933
QIIME UCLUST	400(V4-V5)	No	MC	25000	family	Greengenes	54	2.00286	3.97827
QIIME UCLUST	400(V4-V5)	No	MC	25000	genus	Greengenes	66	2.31957	5.99034
QIIME UCLUST	400(V4-V5)	No	MC	50000	family	Greengenes	54	2.0147	4.0165
QIIME UCLUST	400(V4-V5)	No	MC	50000	genus	Greengenes	66	2.33363	6.02515
QIIME UCLUST	400(V4-V5)	No	MC	100000	family	Greengenes	54	2.00915	3.98151
QIIME UCLUST	400(V4-V5)	No	MC	100000	genus	Greengenes	67	2.33092	6.00854
QIIME UCLUST	400(V4-V5)	No	HC	25000	family	Greengenes	54	3.71081	30.0334
QIIME UCLUST	400(V4-V5)	No	HC	25000	genus	Greengenes	68	3.95965	37.4529
QIIME UCLUST	400(V4-V5)	No	HC	50000	family	Greengenes	54	3.70526	29.7411
QIIME UCLUST	400(V4-V5)	No	HC	50000	genus	Greengenes	66	3.92823	36.3775
QIIME UCLUST	400(V4-V5)	No	HC	100000	family	Greengenes	54	3.7072	29.7012
QIIME UCLUST	400(V4-V5)	No	HC	100000	genus	Greengenes	65	3.90449	35.5283
QIIME UCLUST	200(V3)	Yes	LC	25000	family	Greengenes	66	3.06606	7.23915
QIIME UCLUST	200(V3)	Yes	LC	25000	genus	Greengenes	96	3.48547	13.0736
QIIME UCLUST	200(V3)	Yes	LC	50000	family	Greengenes	69	3.12589	7.80803
QIIME UCLUST	200(V3)	Yes	LC	50000	genus	Greengenes	98	3.53349	13.0802
QIIME UCLUST	200(V3)	Yes	LC	100000	family	Greengenes	70	3.11057	7.42275
QIIME UCLUST	200(V3)	Yes	LC	100000	genus	Greengenes	105	3.54389	13.8953
QIIME UCLUST	200(V3)	Yes	MC	25000	family	Greengenes	63	1.98405	3.93577
QIIME UCLUST	200(V3)	Yes	MC	25000	genus	Greengenes	83	2.33568	5.58548
QIIME UCLUST	200(V3)	Yes	MC	50000	family	Greengenes	66	1.99479	3.94878
QIIME UCLUST	200(V3)	Yes	MC	50000	genus	Greengenes	92	2.36599	5.62283
QIIME UCLUST	200(V3)	Yes	MC	100000	family	Greengenes	69	1.9832	3.92607
QIIME UCLUST	200(V3)	Yes	MC	100000	genus	Greengenes	97	2.34066	5.60349
QIIME UCLUST	200(V3)	Yes	HC	25000	family	Greengenes	64	3.79585	32.9608
QIIME UCLUST	200(V3)	Yes	HC	25000	genus	Greengenes	95	4.0615	39.7373
QIIME UCLUST	200(V3)	Yes	HC	50000	family	Greengenes	72	3.73255	30.1078
QIIME UCLUST	200(V3)	Yes	HC	50000	genus	Greengenes	109	4.00906	36.0577
QIIME UCLUST	200(V3)	Yes	HC	100000	family	Greengenes	76	3.77422	31.7677
QIIME UCLUST	200(V3)	Yes	HC	100000	genus	Greengenes	113	4.0649	39.9651
QIIME UCLUST	400(V4-V5)	Yes	LC	25000	family	Greengenes	55	3.06349	7.3807
QIIME UCLUST	400(V4-V5)	Yes	LC	25000	genus	Greengenes	86	3.58096	15.9187
QIIME UCLUST	400(V4-V5)	Yes	LC	50000	family	Greengenes	56	3.07551	7.60509
QIIME UCLUST	400(V4-V5)	Yes	LC	50000	genus	Greengenes	93	3.526	12.5669
QIIME UCLUST	400(V4-V5)	Yes	LC	100000	family	Greengenes	60	3.06674	7.43946
QIIME UCLUST	400(V4-V5)	Yes	LC	100000	genus	Greengenes	100	3.62786	18.0704
QIIME UCLUST	400(V4-V5)	Yes	MC	25000	family	Greengenes	56	1.95769	3.90838
QIIME UCLUST	400(V4-V5)	Yes	MC	25000	genus	Greengenes	84	2.41875	6.45054
QIIME UCLUST	400(V4-V5)	Yes	MC	50000	family	Greengenes	54	1.96867	3.93797
QIIME UCLUST	400(V4-V5)	Yes	MC	50000	genus	Greengenes	86	2.41976	6.4308
QIIME UCLUST	400(V4-V5)	Yes	MC	100000	family	Greengenes	58	1.98726	3.96613
QIIME UCLUST	400(V4-V5)	Yes	MC	100000	genus	Greengenes	94	2.44556	6.5096
QIIME UCLUST	400(V4-V5)	Yes	HC	25000	family	Greengenes	54	3.70715	30.4531
QIIME UCLUST	400(V4-V5)	Yes	HC	25000	genus	Greengenes	85	4.02339	38.1785
QIIME UCLUST	400(V4-V5)	Yes	HC	50000	family	Greengenes	57	3.69767	30.0098
QIIME UCLUST	400(V4-V5)	Yes	HC	50000	genus	Greengenes	98	4.02722	37.9721
QIIME UCLUST	400(V4-V5)	Yes	HC	100000	family	Greengenes	62	3.70966	29.9761
QIIME UCLUST	400(V4-V5)	Yes	HC	100000	genus	Greengenes	99	4.03067	36.6246
QIIME UCLUST	real				family	Greengenes	102	2.03955	5.39946
QIIME UCLUST	real				genus	Greengenes	153	2.61347	8.72276
QIIME UCLUST	200(V3)	No	LC	25000	family	SILVA	58	3.08994	7.47938
QIIME UCLUST	200(V3)	No	LC	25000	genus	SILVA	77	3.265	7.84948
QIIME UCLUST	200(V3)	No	LC	50000	family	SILVA	57	3.08501	7.48566
QIIME UCLUST	200(V3)	No	LC	50000	genus	SILVA	76	3.26125	7.84537
QIIME UCLUST	200(V3)	No	LC	100000	family	SILVA	57	3.08329	7.4096
QIIME UCLUST	200(V3)	No	LC	100000	genus	SILVA	78	3.28032	7.78819
QIIME UCLUST	200(V3)	No	MC	25000	family	SILVA	58	1.99849	3.97267
QIIME UCLUST	200(V3)	No	MC	25000	genus	SILVA	75	2.31879	5.92638
QIIME UCLUST	200(V3)	No	MC	50000	family	SILVA	57	2.00788	3.98513
QIIME UCLUST	200(V3)	No	MC	50000	genus	SILVA	77	2.33706	5.98622
QIIME UCLUST	200(V3)	No	MC	100000	family	SILVA	57	1.99385	3.94871
QIIME UCLUST	200(V3)	No	MC	100000	genus	SILVA	79	2.32784	5.93206
QIIME UCLUST	200(V3)	No	HC	25000	family	SILVA	59	3.76411	30.4076
QIIME UCLUST	200(V3)	No	HC	25000	genus	SILVA	77	3.99227	35.3871
QIIME UCLUST	200(V3)	No	HC	50000	family	SILVA	58	3.74434	29.7542
QIIME UCLUST	200(V3)	No	HC	50000	genus	SILVA	78	3.99271	34.795
QIIME UCLUST	200(V3)	No	HC	100000	family	SILVA	57	3.73226	29.7569
QIIME UCLUST	200(V3)	No	HC	100000	genus	SILVA	75	3.93781	33.0629
QIIME UCLUST	400(V4-V5)	No	LC	25000	family	SILVA	56	3.0978	7.58609
QIIME UCLUST	400(V4-V5)	No	LC	25000	genus	SILVA	75	3.56964	15.7037
QIIME UCLUST	400(V4-V5)	No	LC	50000	family	SILVA	56	3.10878	7.76189
QIIME UCLUST	400(V4-V5)	No	LC	50000	genus	SILVA	74	3.58289	16.5203
QIIME UCLUST	400(V4-V5)	No	LC	100000	family	SILVA	56	3.09406	7.59555
QIIME UCLUST	400(V4-V5)	No	LC	100000	genus	SILVA	75	3.56597	15.7036
QIIME UCLUST	400(V4-V5)	No	MC	25000	family	SILVA	56	2.00574	3.97833
QIIME UCLUST	400(V4-V5)	No	MC	25000	genus	SILVA	75	2.48203	6.85424
QIIME UCLUST	400(V4-V5)	No	MC	50000	family	SILVA	56	2.01019	4.00465
QIIME UCLUST	400(V4-V5)	No	MC	50000	genus	SILVA	74	2.48387	6.86773
QIIME UCLUST	400(V4-V5)	No	MC	100000	family	SILVA	56	2.0029	3.96822
QIIME UCLUST	400(V4-V5)	No	MC	100000	genus	SILVA	74	2.47872	6.84066
QIIME UCLUST	400(V4-V5)	No	HC	25000	family	SILVA	56	3.7268	30.1665
QIIME UCLUST	400(V4-V5)	No	HC	25000	genus	SILVA	75	4.02289	37.8398
QIIME UCLUST	400(V4-V5)	No	HC	50000	family	SILVA	56	3.72365	29.9386
QIIME UCLUST	400(V4-V5)	No	HC	50000	genus	SILVA	75	4.02798	37.9703
QIIME UCLUST	400(V4-V5)	No	HC	100000	family	SILVA	56	3.72305	29.8273
QIIME UCLUST	400(V4-V5)	No	HC	100000	genus	SILVA	75	4.02016	37.3912
QIIME UCLUST	200(V3)	Yes	LC	25000	family	SILVA	95	3.05798	7.04299
QIIME UCLUST	200(V3)	Yes	LC	25000	genus	SILVA	253	4.07555	31.6772
QIIME UCLUST	200(V3)	Yes	LC	50000	family	SILVA	130	3.3472	10.6483
QIIME UCLUST	200(V3)	Yes	LC	50000	genus	SILVA	317	4.23107	37.0748
QIIME UCLUST	200(V3)	Yes	LC	100000	family	SILVA	141	3.34599	10.7988
QIIME UCLUST	200(V3)	Yes	LC	100000	genus	SILVA	416	4.22652	35.8201
QIIME UCLUST	200(V3)	Yes	MC	25000	family	SILVA	73	2.03211	4.14679
QIIME UCLUST	200(V3)	Yes	MC	25000	genus	SILVA	140	2.88435	8.92165
QIIME UCLUST	200(V3)	Yes	MC	50000	family	SILVA	82	2.20418	4.84606
QIIME UCLUST	200(V3)	Yes	MC	50000	genus	SILVA	180	2.95084	9.13411
QIIME UCLUST	200(V3)	Yes	MC	100000	family	SILVA	87	1.99928	3.97141
QIIME UCLUST	200(V3)	Yes	MC	100000	genus	SILVA	206	2.76894	7.90104
QIIME UCLUST	200(V3)	Yes	HC	25000	family	SILVA	107	3.77272	29.0716
QIIME UCLUST	200(V3)	Yes	HC	25000	genus	SILVA	256	4.27371	38.1852
QIIME UCLUST	200(V3)	Yes	HC	50000	family	SILVA	135	3.80255	29.3087
QIIME UCLUST	200(V3)	Yes	HC	50000	genus	SILVA	357	4.25851	37.0535
QIIME UCLUST	200(V3)	Yes	HC	100000	family	SILVA	175	3.82284	29.7457
QIIME UCLUST	200(V3)	Yes	HC	100000	genus	SILVA	490	4.36619	40.3637
QIIME UCLUST	400(V4-V5)	Yes	LC	25000	family	SILVA	73	3.10563	7.28055
QIIME UCLUST	400(V4-V5)	Yes	LC	25000	genus	SILVA	203	4.11309	27.0275
QIIME UCLUST	400(V4-V5)	Yes	LC	50000	family	SILVA	87	3.11079	7.45112
QIIME UCLUST	400(V4-V5)	Yes	LC	50000	genus	SILVA	271	3.90346	17.985
QIIME UCLUST	400(V4-V5)	Yes	LC	100000	family	SILVA	89	3.09173	7.26789
QIIME UCLUST	400(V4-V5)	Yes	LC	100000	genus	SILVA	320	4.06395	26.8789
QIIME UCLUST	400(V4-V5)	Yes	MC	25000	family	SILVA	66	1.95502	3.87339
QIIME UCLUST	400(V4-V5)	Yes	MC	25000	genus	SILVA	137	2.62405	6.87366
QIIME UCLUST	400(V4-V5)	Yes	MC	50000	family	SILVA	70	1.97571	3.91533
QIIME UCLUST	400(V4-V5)	Yes	MC	50000	genus	SILVA	174	2.56813	6.04439
QIIME UCLUST	400(V4-V5)	Yes	MC	100000	family	SILVA	82	1.98557	3.91213
QIIME UCLUST	400(V4-V5)	Yes	MC	100000	genus	SILVA	221	2.61803	6.58598
QIIME UCLUST	400(V4-V5)	Yes	HC	25000	family	SILVA	76	3.78713	31.3878
QIIME UCLUST	400(V4-V5)	Yes	HC	25000	genus	SILVA	185	4.21093	41.2761
QIIME UCLUST	400(V4-V5)	Yes	HC	50000	family	SILVA	84	3.77294	30.7135
QIIME UCLUST	400(V4-V5)	Yes	HC	50000	genus	SILVA	253	4.20748	39.6124
QIIME UCLUST	400(V4-V5)	Yes	HC	100000	family	SILVA	91	3.76583	30.2164
QIIME UCLUST	400(V4-V5)	Yes	HC	100000	genus	SILVA	314	4.21549	39.3712
QIIME UCLUST	real				family	SILVA	120	1.77906	3.57621
QIIME UCLUST	real				genus	SILVA	325	3.16176	13.5241
QIIME SortMeRna SUMACLUST	200(V3)	No	LC	25000	family	Greengenes	53	3.06494	7.50847
QIIME SortMeRna SUMACLUST	200(V3)	No	LC	25000	genus	Greengenes	63	3.21316	7.89055
QIIME SortMeRna SUMACLUST	200(V3)	No	LC	50000	family	Greengenes	53	3.05457	7.47586
QIIME SortMeRna SUMACLUST	200(V3)	No	LC	50000	genus	Greengenes	64	3.27397	8.73064
QIIME SortMeRna SUMACLUST	200(V3)	No	LC	100000	family	Greengenes	52	3.04188	7.39153
QIIME SortMeRna SUMACLUST	200(V3)	No	LC	100000	genus	Greengenes	62	3.18941	7.7591
QIIME SortMeRna SUMACLUST	200(V3)	No	MC	25000	family	Greengenes	52	1.99211	3.985
QIIME SortMeRna SUMACLUST	200(V3)	No	MC	25000	genus	Greengenes	66	2.31548	5.9551
QIIME SortMeRna SUMACLUST	200(V3)	No	MC	50000	family	Greengenes	53	2.00192	3.98579
QIIME SortMeRna SUMACLUST	200(V3)	No	MC	50000	genus	Greengenes	65	2.32364	5.9893
QIIME SortMeRna SUMACLUST	200(V3)	No	MC	100000	family	Greengenes	53	1.98292	3.94817
QIIME SortMeRna SUMACLUST	200(V3)	No	MC	100000	genus	Greengenes	63	2.30109	5.93252
QIIME SortMeRna SUMACLUST	200(V3)	No	HC	25000	family	Greengenes	53	3.70342	30.6581
QIIME SortMeRna SUMACLUST	200(V3)	No	HC	25000	genus	Greengenes	65	3.93334	37.7556
QIIME SortMeRna SUMACLUST	200(V3)	No	HC	50000	family	Greengenes	54	3.70798	30.278
QIIME SortMeRna SUMACLUST	200(V3)	No	HC	50000	genus	Greengenes	67	3.94368	36.3212
QIIME SortMeRna SUMACLUST	200(V3)	No	HC	100000	family	Greengenes	52	3.67001	29.0763
QIIME SortMeRna SUMACLUST	200(V3)	No	HC	100000	genus	Greengenes	62	3.8831	35.2294
QIIME SortMeRna SUMACLUST	400(V4-V5)	No	LC	25000	family	Greengenes	53	3.07337	7.57123
QIIME SortMeRna SUMACLUST	400(V4-V5)	No	LC	25000	genus	Greengenes	62	3.25026	8.50332
QIIME SortMeRna SUMACLUST	400(V4-V5)	No	LC	50000	family	Greengenes	53	3.0835	7.74482
QIIME SortMeRna SUMACLUST	400(V4-V5)	No	LC	50000	genus	Greengenes	64	3.29065	8.78111
QIIME SortMeRna SUMACLUST	400(V4-V5)	No	LC	100000	family	Greengenes	53	3.06951	7.58028
QIIME SortMeRna SUMACLUST	400(V4-V5)	No	LC	100000	genus	Greengenes	63	3.26025	8.53824
QIIME SortMeRna SUMACLUST	400(V4-V5)	No	MC	25000	family	Greengenes	53	1.99878	3.978
QIIME SortMeRna SUMACLUST	400(V4-V5)	No	MC	25000	genus	Greengenes	63	2.32141	6.01341
QIIME SortMeRna SUMACLUST	400(V4-V5)	No	MC	50000	family	Greengenes	53	2.01093	4.01626
QIIME SortMeRna SUMACLUST	400(V4-V5)	No	MC	50000	genus	Greengenes	63	2.32704	6.02444
QIIME SortMeRna SUMACLUST	400(V4-V5)	No	MC	100000	family	Greengenes	53	2.0051	3.98124
QIIME SortMeRna SUMACLUST	400(V4-V5)	No	MC	100000	genus	Greengenes	64	2.33419	6.03538
QIIME SortMeRna SUMACLUST	400(V4-V5)	No	HC	25000	family	Greengenes	53	3.69168	29.693
QIIME SortMeRna SUMACLUST	400(V4-V5)	No	HC	25000	genus	Greengenes	63	3.90063	35.9201
QIIME SortMeRna SUMACLUST	400(V4-V5)	No	HC	50000	family	Greengenes	53	3.68579	29.3958
QIIME SortMeRna SUMACLUST	400(V4-V5)	No	HC	50000	genus	Greengenes	63	3.8973	35.5574
QIIME SortMeRna SUMACLUST	400(V4-V5)	No	HC	100000	family	Greengenes	53	3.68753	29.3504
QIIME SortMeRna SUMACLUST	400(V4-V5)	No	HC	100000	genus	Greengenes	62	3.87823	34.9662
QIIME SortMeRna SUMACLUST	200(V3)	Yes	LC	25000	family	Greengenes	65	3.27651	10.7817
QIIME SortMeRna SUMACLUST	200(V3)	Yes	LC	25000	genus	Greengenes	91	3.527	11.561
QIIME SortMeRna SUMACLUST	200(V3)	Yes	LC	50000	family	Greengenes	67	3.08465	7.42669
QIIME SortMeRna SUMACLUST	200(V3)	Yes	LC	50000	genus	Greengenes	95	3.32003	8.03534
QIIME SortMeRna SUMACLUST	200(V3)	Yes	LC	100000	family	Greengenes	70	3.17605	8.39129
QIIME SortMeRna SUMACLUST	200(V3)	Yes	LC	100000	genus	Greengenes	100	3.48864	10.7641
QIIME SortMeRna SUMACLUST	200(V3)	Yes	MC	25000	family	Greengenes	59	1.99519	3.95267
QIIME SortMeRna SUMACLUST	200(V3)	Yes	MC	25000	genus	Greengenes	79	2.40481	6.28485
QIIME SortMeRna SUMACLUST	200(V3)	Yes	MC	50000	family	Greengenes	60	1.99715	3.96882
QIIME SortMeRna SUMACLUST	200(V3)	Yes	MC	50000	genus	Greengenes	84	2.39986	6.23207
QIIME SortMeRna SUMACLUST	200(V3)	Yes	MC	100000	family	Greengenes	63	1.98521	3.93413
QIIME SortMeRna SUMACLUST	200(V3)	Yes	MC	100000	genus	Greengenes	87	2.32085	5.92077
QIIME SortMeRna SUMACLUST	200(V3)	Yes	HC	25000	family	Greengenes	68	3.7753	32.2095
QIIME SortMeRna SUMACLUST	200(V3)	Yes	HC	25000	genus	Greengenes	102	4.03765	38.8056
QIIME SortMeRna SUMACLUST	200(V3)	Yes	HC	50000	family	Greengenes	68	3.70536	29.7252
QIIME SortMeRna SUMACLUST	200(V3)	Yes	HC	50000	genus	Greengenes	99	4.02052	37.221
QIIME SortMeRna SUMACLUST	200(V3)	Yes	HC	100000	family	Greengenes	74	3.77354	32.2464
QIIME SortMeRna SUMACLUST	200(V3)	Yes	HC	100000	genus	Greengenes	108	4.03491	39.3424
QIIME SortMeRna SUMACLUST	400(V4-V5)	Yes	LC	25000	family	Greengenes	54	3.05869	7.36457
QIIME SortMeRna SUMACLUST	400(V4-V5)	Yes	LC	25000	genus	Greengenes	79	3.58747	18.8091
QIIME SortMeRna SUMACLUST	400(V4-V5)	Yes	LC	50000	family	Greengenes	54	3.07403	7.55453
QIIME SortMeRna SUMACLUST	400(V4-V5)	Yes	LC	50000	genus	Greengenes	82	3.28173	7.99824
QIIME SortMeRna SUMACLUST	400(V4-V5)	Yes	LC	100000	family	Greengenes	57	3.06353	7.4098
QIIME SortMeRna SUMACLUST	400(V4-V5)	Yes	LC	100000	genus	Greengenes	89	3.4335	10.9406
QIIME SortMeRna SUMACLUST	400(V4-V5)	Yes	MC	25000	family	Greengenes	55	1.9752	3.92539
QIIME SortMeRna SUMACLUST	400(V4-V5)	Yes	MC	25000	genus	Greengenes	78	2.36484	5.95656
QIIME SortMeRna SUMACLUST	400(V4-V5)	Yes	MC	50000	family	Greengenes	55	1.98863	3.96354
QIIME SortMeRna SUMACLUST	400(V4-V5)	Yes	MC	50000	genus	Greengenes	83	2.27145	4.66841
QIIME SortMeRna SUMACLUST	400(V4-V5)	Yes	MC	100000	family	Greengenes	55	1.98747	3.94106
QIIME SortMeRna SUMACLUST	400(V4-V5)	Yes	MC	100000	genus	Greengenes	86	2.48988	7.01768
QIIME SortMeRna SUMACLUST	400(V4-V5)	Yes	HC	25000	family	Greengenes	56	3.69001	29.4556
QIIME SortMeRna SUMACLUST	400(V4-V5)	Yes	HC	25000	genus	Greengenes	82	3.98448	37.0344
QIIME SortMeRna SUMACLUST	400(V4-V5)	Yes	HC	50000	family	Greengenes	53	3.68077	29.1196
QIIME SortMeRna SUMACLUST	400(V4-V5)	Yes	HC	50000	genus	Greengenes	81	3.97687	36.636
QIIME SortMeRna SUMACLUST	400(V4-V5)	Yes	HC	100000	family	Greengenes	58	3.68457	29.086
QIIME SortMeRna SUMACLUST	400(V4-V5)	Yes	HC	100000	genus	Greengenes	92	3.97999	36.7501
QIIME SortMeRna SUMACLUST	real				family	Greengenes	53	1.91119	4.61319
QIIME SortMeRna SUMACLUST	real				genus	Greengenes	91	2.55865	7.71656
QIIME SortMeRna SUMACLUST	200(V3)	No	LC	25000	family	SILVA	58	3.10889	7.51549
QIIME SortMeRna SUMACLUST	200(V3)	No	LC	25000	genus	SILVA	68	3.30911	8.79273
QIIME SortMeRna SUMACLUST	200(V3)	No	LC	50000	family	SILVA	56	3.08811	7.50366
QIIME SortMeRna SUMACLUST	200(V3)	No	LC	50000	genus	SILVA	66	3.28519	8.73461
QIIME SortMeRna SUMACLUST	200(V3)	No	LC	100000	family	SILVA	58	3.09054	7.20627
QIIME SortMeRna SUMACLUST	200(V3)	No	LC	100000	genus	SILVA	68	3.30481	8.68128
QIIME SortMeRna SUMACLUST	200(V3)	No	MC	25000	family	SILVA	57	1.99564	3.9593
QIIME SortMeRna SUMACLUST	200(V3)	No	MC	25000	genus	SILVA	66	2.30682	5.92947
QIIME SortMeRna SUMACLUST	200(V3)	No	MC	50000	family	SILVA	57	2.00987	3.98533
QIIME SortMeRna SUMACLUST	200(V3)	No	MC	50000	genus	SILVA	68	2.32836	5.98762
QIIME SortMeRna SUMACLUST	200(V3)	No	MC	100000	family	SILVA	55	1.97809	3.9252
QIIME SortMeRna SUMACLUST	200(V3)	No	MC	100000	genus	SILVA	67	2.29787	5.90583
QIIME SortMeRna SUMACLUST	200(V3)	No	HC	25000	family	SILVA	58	3.76901	31.5837
QIIME SortMeRna SUMACLUST	200(V3)	No	HC	25000	genus	SILVA	68	3.9657	37.9454
QIIME SortMeRna SUMACLUST	200(V3)	No	HC	50000	family	SILVA	56	3.72159	29.1533
QIIME SortMeRna SUMACLUST	200(V3)	No	HC	50000	genus	SILVA	69	3.95554	35.8469
QIIME SortMeRna SUMACLUST	200(V3)	No	HC	100000	family	SILVA	56	3.72248	29.8349
QIIME SortMeRna SUMACLUST	200(V3)	No	HC	100000	genus	SILVA	66	3.91414	35.394
QIIME SortMeRna SUMACLUST	400(V4-V5)	No	LC	25000	family	SILVA	55	3.09468	7.58583
QIIME SortMeRna SUMACLUST	400(V4-V5)	No	LC	25000	genus	SILVA	69	3.35201	9.18757
QIIME SortMeRna SUMACLUST	400(V4-V5)	No	LC	50000	family	SILVA	55	3.09874	7.74593
QIIME SortMeRna SUMACLUST	400(V4-V5)	No	LC	50000	genus	SILVA	67	3.34309	9.42845
QIIME SortMeRna SUMACLUST	400(V4-V5)	No	LC	100000	family	SILVA	55	3.08421	7.58046
QIIME SortMeRna SUMACLUST	400(V4-V5)	No	LC	100000	genus	SILVA	69	3.3646	9.22297
QIIME SortMeRna SUMACLUST	400(V4-V5)	No	MC	25000	family	SILVA	55	2.00306	3.97799
QIIME SortMeRna SUMACLUST	400(V4-V5)	No	MC	25000	genus	SILVA	68	2.34508	6.04558
QIIME SortMeRna SUMACLUST	400(V4-V5)	No	MC	50000	family	SILVA	55	2.01512	4.01625
QIIME SortMeRna SUMACLUST	400(V4-V5)	No	MC	50000	genus	SILVA	69	2.36254	6.09053
QIIME SortMeRna SUMACLUST	400(V4-V5)	No	MC	100000	family	SILVA	55	2.00879	3.98116
QIIME SortMeRna SUMACLUST	400(V4-V5)	No	MC	100000	genus	SILVA	67	2.33313	6.00761
QIIME SortMeRna SUMACLUST	400(V4-V5)	No	HC	25000	family	SILVA	55	3.72301	30.1718
QIIME SortMeRna SUMACLUST	400(V4-V5)	No	HC	25000	genus	SILVA	69	3.98331	37.6063
QIIME SortMeRna SUMACLUST	400(V4-V5)	No	HC	50000	family	SILVA	55	3.71925	29.9355
QIIME SortMeRna SUMACLUST	400(V4-V5)	No	HC	50000	genus	SILVA	68	3.94664	35.6941
QIIME SortMeRna SUMACLUST	400(V4-V5)	No	HC	100000	family	SILVA	55	3.70794	29.3278
QIIME SortMeRna SUMACLUST	400(V4-V5)	No	HC	100000	genus	SILVA	67	3.93797	35.473
QIIME SortMeRna SUMACLUST	200(V3)	Yes	LC	25000	family	SILVA	87	3.14596	7.65009
QIIME SortMeRna SUMACLUST	200(V3)	Yes	LC	25000	genus	SILVA	179	3.72996	13.9087
QIIME SortMeRna SUMACLUST	200(V3)	Yes	LC	50000	family	SILVA	100	3.14471	7.56737
QIIME SortMeRna SUMACLUST	200(V3)	Yes	LC	50000	genus	SILVA	212	3.81582	15.8092
QIIME SortMeRna SUMACLUST	200(V3)	Yes	LC	100000	family	SILVA	106	3.14091	7.87227
QIIME SortMeRna SUMACLUST	200(V3)	Yes	LC	100000	genus	SILVA	256	3.71815	15.0972
QIIME SortMeRna SUMACLUST	200(V3)	Yes	MC	25000	family	SILVA	72	2.02492	4.03425
QIIME SortMeRna SUMACLUST	200(V3)	Yes	MC	25000	genus	SILVA	124	2.5993	7.33983
QIIME SortMeRna SUMACLUST	200(V3)	Yes	MC	50000	family	SILVA	66	2.03458	4.0617
QIIME SortMeRna SUMACLUST	200(V3)	Yes	MC	50000	genus	SILVA	127	2.5264	6.62319
QIIME SortMeRna SUMACLUST	200(V3)	Yes	MC	100000	family	SILVA	74	2.03181	4.05747
QIIME SortMeRna SUMACLUST	200(V3)	Yes	MC	100000	genus	SILVA	159	2.26577	4.63436
QIIME SortMeRna SUMACLUST	200(V3)	Yes	HC	25000	family	SILVA	105	3.81348	31.44
QIIME SortMeRna SUMACLUST	200(V3)	Yes	HC	25000	genus	SILVA	209	4.18156	37.5917
QIIME SortMeRna SUMACLUST	200(V3)	Yes	HC	50000	family	SILVA	102	3.79207	30.3102
QIIME SortMeRna SUMACLUST	200(V3)	Yes	HC	50000	genus	SILVA	233	4.18171	36.978
QIIME SortMeRna SUMACLUST	200(V3)	Yes	HC	100000	family	SILVA	123	3.79978	30.2378
QIIME SortMeRna SUMACLUST	200(V3)	Yes	HC	100000	genus	SILVA	271	4.14536	36.7447
QIIME SortMeRna SUMACLUST	400(V4-V5)	Yes	LC	25000	family	SILVA	63	3.08794	7.37148
QIIME SortMeRna SUMACLUST	400(V4-V5)	Yes	LC	25000	genus	SILVA	127	3.45061	9.58855
QIIME SortMeRna SUMACLUST	400(V4-V5)	Yes	LC	50000	family	SILVA	70	3.1045	7.58362
QIIME SortMeRna SUMACLUST	400(V4-V5)	Yes	LC	50000	genus	SILVA	154	3.52428	10.6194
QIIME SortMeRna SUMACLUST	400(V4-V5)	Yes	LC	100000	family	SILVA	76	3.10743	7.43538
QIIME SortMeRna SUMACLUST	400(V4-V5)	Yes	LC	100000	genus	SILVA	187	3.56412	10.4171
QIIME SortMeRna SUMACLUST	400(V4-V5)	Yes	MC	25000	family	SILVA	65	1.98819	3.92023
QIIME SortMeRna SUMACLUST	400(V4-V5)	Yes	MC	25000	genus	SILVA	109	2.14499	4.1611
QIIME SortMeRna SUMACLUST	400(V4-V5)	Yes	MC	50000	family	SILVA	62	1.99546	3.96172
QIIME SortMeRna SUMACLUST	400(V4-V5)	Yes	MC	50000	genus	SILVA	131	2.57676	7.10284
QIIME SortMeRna SUMACLUST	400(V4-V5)	Yes	MC	100000	family	SILVA	66	1.99692	3.93929
QIIME SortMeRna SUMACLUST	400(V4-V5)	Yes	MC	100000	genus	SILVA	140	2.49352	6.38686
QIIME SortMeRna SUMACLUST	400(V4-V5)	Yes	HC	25000	family	SILVA	68	3.74848	29.8743
QIIME SortMeRna SUMACLUST	400(V4-V5)	Yes	HC	25000	genus	SILVA	118	4.06011	36.8239
QIIME SortMeRna SUMACLUST	400(V4-V5)	Yes	HC	50000	family	SILVA	67	3.73761	29.5238
QIIME SortMeRna SUMACLUST	400(V4-V5)	Yes	HC	50000	genus	SILVA	133	4.06325	36.9982
QIIME SortMeRna SUMACLUST	400(V4-V5)	Yes	HC	100000	family	SILVA	71	3.75739	30.2776
QIIME SortMeRna SUMACLUST	400(V4-V5)	Yes	HC	100000	genus	SILVA	201	4.08448	35.7972
QIIME SortMeRna SUMACLUST	real				family	SILVA	76	1.66153	3.48549
QIIME SortMeRna SUMACLUST	real				genus	SILVA	216	2.96902	10.475
CLARK	200(V3)	No	LC	25000	family	RefSeq Bacteria	47	3.56074	24.9584
CLARK	200(V3)	No	LC	25000	genus	RefSeq Bacteria	60	3.8108	29.9834
CLARK	200(V3)	No	LC	50000	family	RefSeq Bacteria	47	3.5667	25.2
CLARK	200(V3)	No	LC	50000	genus	RefSeq Bacteria	60	3.81326	30.0719
CLARK	200(V3)	No	LC	100000	family	RefSeq Bacteria	47	3.57545	25.8082
CLARK	200(V3)	No	LC	100000	genus	RefSeq Bacteria	60	3.82718	31.1085
CLARK	200(V3)	No	MC	25000	family	RefSeq Bacteria	47	2.1051	3.87647
CLARK	200(V3)	No	MC	25000	genus	RefSeq Bacteria	60	2.22099	3.99454
CLARK	200(V3)	No	MC	50000	family	RefSeq Bacteria	47	2.11642	3.9169
CLARK	200(V3)	No	MC	50000	genus	RefSeq Bacteria	60	2.23034	4.02858
CLARK	200(V3)	No	MC	100000	family	RefSeq Bacteria	47	2.10017	3.8715
CLARK	200(V3)	No	MC	100000	genus	RefSeq Bacteria	60	2.2125	3.98208
CLARK	200(V3)	No	HC	25000	family	RefSeq Bacteria	47	3.57512	25.8357
CLARK	200(V3)	No	HC	25000	genus	RefSeq Bacteria	60	3.82779	31.219
CLARK	200(V3)	No	HC	50000	family	RefSeq Bacteria	47	3.57059	25.5352
CLARK	200(V3)	No	HC	50000	genus	RefSeq Bacteria	60	3.82316	30.7905
CLARK	200(V3)	No	HC	100000	family	RefSeq Bacteria	47	3.57459	25.8283
CLARK	200(V3)	No	HC	100000	genus	RefSeq Bacteria	60	3.82846	31.2313
CLARK	400(V4-V5)	No	LC	25000	family	RefSeq Bacteria	48	2.94132	6.78792
CLARK	400(V4-V5)	No	LC	25000	genus	RefSeq Bacteria	65	3.24908	8.11382
CLARK	400(V4-V5)	No	LC	50000	family	RefSeq Bacteria	48	2.95489	6.96852
CLARK	400(V4-V5)	No	LC	50000	genus	RefSeq Bacteria	65	3.2639	8.35981
CLARK	400(V4-V5)	No	LC	100000	family	RefSeq Bacteria	48	2.93821	6.80184
CLARK	400(V4-V5)	No	LC	100000	genus	RefSeq Bacteria	65	3.24494	8.12359
CLARK	400(V4-V5)	No	MC	25000	family	RefSeq Bacteria	48	1.92347	3.85181
CLARK	400(V4-V5)	No	MC	25000	genus	RefSeq Bacteria	65	2.30486	5.93636
CLARK	400(V4-V5)	No	MC	50000	family	RefSeq Bacteria	48	1.93891	3.89377
CLARK	400(V4-V5)	No	MC	50000	genus	RefSeq Bacteria	65	2.32226	5.98963
CLARK	400(V4-V5)	No	MC	100000	family	RefSeq Bacteria	48	1.93013	3.85491
CLARK	400(V4-V5)	No	MC	100000	genus	RefSeq Bacteria	65	2.31804	5.97298
CLARK	400(V4-V5)	No	HC	25000	family	RefSeq Bacteria	48	3.58842	26.685
CLARK	400(V4-V5)	No	HC	25000	genus	RefSeq Bacteria	65	3.92183	35.3969
CLARK	400(V4-V5)	No	HC	50000	family	RefSeq Bacteria	48	3.58087	26.3772
CLARK	400(V4-V5)	No	HC	50000	genus	RefSeq Bacteria	65	3.91652	34.9541
CLARK	400(V4-V5)	No	HC	100000	family	RefSeq Bacteria	48	3.58166	26.2793
CLARK	400(V4-V5)	No	HC	100000	genus	RefSeq Bacteria	65	3.91785	34.8913
CLARK	200(V3)	Yes	LC	25000	family	RefSeq Bacteria	68	3.59953	26.0089
CLARK	200(V3)	Yes	LC	25000	genus	RefSeq Bacteria	95	3.90446	32.2026
CLARK	200(V3)	Yes	LC	50000	family	RefSeq Bacteria	73	3.60947	26.2647
CLARK	200(V3)	Yes	LC	50000	genus	RefSeq Bacteria	108	3.91067	32.3125
CLARK	200(V3)	Yes	LC	100000	family	RefSeq Bacteria	87	3.62049	26.8661
CLARK	200(V3)	Yes	LC	100000	genus	RefSeq Bacteria	130	3.92984	33.4753
CLARK	200(V3)	Yes	MC	25000	family	RefSeq Bacteria	63	2.47587	5.2856
CLARK	200(V3)	Yes	MC	25000	genus	RefSeq Bacteria	87	2.62935	5.48749
CLARK	200(V3)	Yes	MC	50000	family	RefSeq Bacteria	64	2.48844	5.40818
CLARK	200(V3)	Yes	MC	50000	genus	RefSeq Bacteria	96	2.63972	5.60156
CLARK	200(V3)	Yes	MC	100000	family	RefSeq Bacteria	72	2.47532	5.31728
CLARK	200(V3)	Yes	MC	100000	genus	RefSeq Bacteria	109	2.62759	5.51323
CLARK	200(V3)	Yes	HC	25000	family	RefSeq Bacteria	68	3.59793	26.4156
CLARK	200(V3)	Yes	HC	25000	genus	RefSeq Bacteria	94	3.88661	32.6642
CLARK	200(V3)	Yes	HC	50000	family	RefSeq Bacteria	78	3.59832	26.2614
CLARK	200(V3)	Yes	HC	50000	genus	RefSeq Bacteria	115	3.89286	32.4896
CLARK	200(V3)	Yes	HC	100000	family	RefSeq Bacteria	88	3.60084	26.422
CLARK	200(V3)	Yes	HC	100000	genus	RefSeq Bacteria	137	3.89566	32.7449
CLARK	400(V4-V5)	Yes	LC	25000	family	RefSeq Bacteria	62	2.9825	7.07545
CLARK	400(V4-V5)	Yes	LC	25000	genus	RefSeq Bacteria	82	3.28815	8.30674
CLARK	400(V4-V5)	Yes	LC	50000	family	RefSeq Bacteria	64	2.99376	7.25518
CLARK	400(V4-V5)	Yes	LC	50000	genus	RefSeq Bacteria	96	3.30615	8.54493
CLARK	400(V4-V5)	Yes	LC	100000	family	RefSeq Bacteria	80	2.98283	7.11522
CLARK	400(V4-V5)	Yes	LC	100000	genus	RefSeq Bacteria	133	3.29754	8.36055
CLARK	400(V4-V5)	Yes	MC	25000	family	RefSeq Bacteria	54	1.9531	3.91854
CLARK	400(V4-V5)	Yes	MC	25000	genus	RefSeq Bacteria	73	2.32997	6.00267
CLARK	400(V4-V5)	Yes	MC	50000	family	RefSeq Bacteria	63	1.96854	3.95598
CLARK	400(V4-V5)	Yes	MC	50000	genus	RefSeq Bacteria	87	2.34947	6.05229
CLARK	400(V4-V5)	Yes	MC	100000	family	RefSeq Bacteria	67	1.96026	3.91957
CLARK	400(V4-V5)	Yes	MC	100000	genus	RefSeq Bacteria	96	2.34557	6.0365
CLARK	400(V4-V5)	Yes	HC	25000	family	RefSeq Bacteria	60	3.61129	27.3878
CLARK	400(V4-V5)	Yes	HC	25000	genus	RefSeq Bacteria	89	3.95891	35.9393
CLARK	400(V4-V5)	Yes	HC	50000	family	RefSeq Bacteria	74	3.60855	27.0512
CLARK	400(V4-V5)	Yes	HC	50000	genus	RefSeq Bacteria	111	3.9602	35.5198
CLARK	400(V4-V5)	Yes	HC	100000	family	RefSeq Bacteria	89	3.61032	26.9322
CLARK	400(V4-V5)	Yes	HC	100000	genus	RefSeq Bacteria	144	3.9652	35.4305
CLARK	real				family	RefSeq Bacteria	91	2.49761	6.4078
CLARK	real				genus	RefSeq Bacteria	145	2.95511	11.013
